# Supplementary material for: A large lung gene expression study identifying fibulin-5 as a novel player in tissue repair in COPD
Source: HighWire-hosted journal article supplement (doi:10.1136/thoraxjnl-2014-205091), 2014-07-02
Supplement: thoraxjnl-2014-205091supp_tableS1.xls [file thoraxjnl-2014-205091supp_tableS1.xls]

## Sheet: Blad1
Supplemental Table S1
Probeset	GeneSymbol	MetaZScore	MetaPValue	ZscoreCenter0	ZScoreCenter1	ZScoreCenter2
100137698_TGI_at	FBLN5	5.18477	2.16276e-07	4.08094	1.89503	2.72877
100310882_TGI_at	NCOA7	5.00079	5.70953e-07	3.1346	4.54255	0.975899
100148071_TGI_at	CSRP2	4.9362	7.96596e-07	4.1025	1.68428	2.4184
100125446_TGI_at	SLC6A14	4.82688	1.38688e-06	3.11618	1.59375	3.66365
100306412_TGI_at	VAPA	4.75977	1.93812e-06	3.39346	3.13543	1.57149
100161560_TGI_at	LEFTY2	4.69681	2.64252e-06	3.71592	0.975914	3.2013
100303815_TGI_at	IGHM	-4.6797	2.87289e-06	-3.80048	-1.40841	-2.60838
100124099_TGI_at	DUSP26	4.54517	5.48914e-06	2.55199	2.18228	3.28577
100134409_TGI_at	DNAJC5B	4.51743	6.2594e-06	3.14202	2.56371	2.02127
100304384_TGI_at	ASRGL1	4.4666	7.94709e-06	3.80824	1.77448	1.79934
100128639_TGI_at	MACF1	4.45588	8.35491e-06	4.40167	0.519305	2.23394
100307475_TGI_at	VEGFA	-4.44733	8.69449e-06	-1.91995	-3.04991	-3.08388
100128031_TGI_at	SNX1	4.43364	9.26561e-06	3.28437	2.55348	1.66687
100305087_TGI_at	MACF1	4.38289	1.17113e-05	4.02247	0.849891	2.27816
100145782_TGI_at	-	4.37002	1.24237e-05	3.24953	1.93144	2.22318
100307129_TGI_at	MACF1	4.34962	1.36375e-05	3.62349	1.42061	2.18401
100130024_TGI_at	MYH10	4.34518	1.39162e-05	2.68584	1.92037	2.96836
100125185_TGI_at	MAP2	4.30473	1.67191e-05	3.80633	1.39716	1.86435
100158947_TGI_at	KCTD6	4.27439	1.91666e-05	4.19533	1.23667	1.427
100143851_TGI_at	LIMCH1	4.2718	1.93903e-05	3.93995	0.902697	2.11754
100128203_TGI_at	MAP2	4.26097	2.03543e-05	3.95615	1.4189	1.54674
100306933_TGI_at	GPI	-4.25124	2.12593e-05	-2.79371	-3.05951	-1.4689
100309900_TGI_at	DNAJC5B	4.24121	2.22318e-05	3.27276	2.02647	1.8372
100311877_TGI_at	ELN	4.1785	2.93444e-05	2.26211	2.15912	2.98143
100311854_TGI_at	SLC25A46	-4.17668	2.95798e-05	-3.15113	-1.61468	-2.29778
100308557_TGI_at	PPP2CB	4.15316	3.27916e-05	3.78977	2.07466	0.893993
100124735_TGI_at	-	4.15258	3.28753e-05	3.03606	2.03272	1.98312
100159028_TGI_at	VEGFA	-4.13518	3.54674e-05	-2.2976	-2.23885	-2.76442
100158754_TGI_at	TREM2	4.12903	3.64296e-05	2.94535	1.61089	2.49268
100127124_TGI_at	-	4.11164	3.92866e-05	3.43634	1.73179	1.65226
100129084_TGI_at	SGIP1	4.08487	4.41023e-05	3.90673	1.39651	1.28726
100143973_TGI_at	CAMKK1	-4.08429	4.42111e-05	-2.34411	-1.24206	-3.61544
100310033_TGI_at	MAP1A	-4.08285	4.44867e-05	-2.87334	-1.8696	-2.23673
100150596_TGI_at	DUSP18	4.07512	4.59904e-05	3.9362	2.34102	0.26316
100309999_TGI_at	NKD2	4.07511	4.59925e-05	3.96178	1.02106	1.57439
100132323_TGI_at	ELN	4.05947	4.91841e-05	2.05725	2.07406	3.1157
100130960_TGI_at	-	-4.05129	5.0936e-05	-3.06714	-1.14823	-2.64053
100152796_TGI_at	MACF1	4.04263	5.2856e-05	2.93093	1.18051	2.77962
100310986_TGI_at	-	-4.03854	5.37842e-05	-3.14221	-2.05943	-1.58105
100304742_TGI_at	LRRK2	4.02411	5.71909e-05	2.36595	2.3058	2.37974
100305650_TGI_at	GANC	4.02319	5.74144e-05	1.96708	2.8841	2.3422
100160297_TGI_at	MACF1	3.99762	6.39825e-05	3.62325	0.408303	2.51566
100313780_TGI_at	POSTN	-3.99628	6.43456e-05	-2.60818	-2.12947	-2.16753
100133819_TGI_at	C20orf39	-3.99068	6.58847e-05	-4.15918	-0.552183	-1.61019
100152199_TGI_at	PLLP	3.98386	6.7804e-05	4.63511	0.385368	1.10537
100133229_TGI_at	A2M	3.97845	6.93655e-05	2.6574	2.07349	2.12072
100143423_TGI_at	PRPH	-3.96286	7.4056e-05	-2.74167	-2.81668	-1.21423
100162976_TGI_at	C10orf84	-3.94222	8.07315e-05	-3.73622	-1.48917	-1.14538
100157218_TGI_at	RASGRF2	3.93622	8.27758e-05	1.79497	2.86542	2.4271
100131485_TGI_at	MED1	3.93327	8.37989e-05	2.83613	2.19616	1.6571
100149304_TGI_at	F11R	3.91507	9.03778e-05	3.99327	-0.18296	2.44017
100161431_TGI_at	MFAP4	3.91393	9.08068e-05	3.26973	0.389989	2.85885
100303011_TGI_at	FRZB	3.90589	9.38785e-05	3.55596	1.29187	1.52481
100134457_TGI_at	BHLHB5	3.90004	9.61759e-05	3.13707	0.745272	2.65303
100152878_TGI_at	EME2	-3.89491	9.82337e-05	-2.29364	-1.29211	-3.25703
100131479_TGI_at	TRIM45	-3.89356	9.87819e-05	-3.23647	-1.56508	-1.66549
100304251_TGI_at	TSPAN14	3.88966	0.000100384	2.77307	1.49569	2.37255
100126810_TGI_at	IL1R1	3.88471	0.000102454	2.83919	0.443984	3.34388
100303684_TGI_at	GATA5	3.88457	0.000102512	3.51495	2.4425	0.365266
100132634_TGI_at	CDH5	3.87662	0.000105916	3.77026	-0.249789	2.74166
100150796_TGI_at	XPR1	3.86454	0.000111301	2.2262	3.2374	1.30536
100148546_TGI_at	GRM8	-3.85789	0.000114371	-2.25268	-3.45496	-1.03333
100161835_TGI_at	CXorf61	3.85651	0.000115019	2.31012	1.96742	2.46855
100128197_TGI_at	F8	3.85597	0.000115272	2.78042	1.71789	2.06847
100148494_TGI_at	VAPA	3.8541	0.000116157	3.01363	1.85475	1.60098
100123724_TGI_at	-	3.84081	0.00012263	2.41678	2.16699	2.08538
100134453_TGI_at	NNMT	3.83987	0.000123101	2.58091	1.46498	2.57169
100158022_TGI_at	LIMCH1	3.83712	0.000124485	3.75605	0.385105	2.03488
100309693_TGI_at	EIF4G3	-3.83005	0.000128117	-3.0826	-1.02765	-2.30111
100140595_TGI_at	SEPT3	3.82539	0.000130567	3.04007	1.79419	1.56879
100306056_TGI_at	C1QTNF7	3.82076	0.000133042	2.08191	0.971228	3.73091
100127552_TGI_at	MATN2	-3.81376	0.000136869	-2.73473	-2.15902	-1.59772
100306474_TGI_at	IDE	-3.80935	0.00013933	-2.71228	-1.25522	-2.54233
100303787_TGI_at	RALBP1	3.80618	0.000141127	2.00463	1.8543	2.90823
100307985_TGI_at	NTRK2	3.80472	0.000141964	3.55675	0.617015	2.01065
100134346_TGI_at	PLCXD3	-3.79336	0.000148625	-3.1526	-1.88481	-1.25609
100301455_TGI_at	MACF1	3.77462	0.000160253	2.90596	1.20562	2.25453
100160634_TGI_at	RNASE6	3.7628	0.00016802	2.94436	2.15638	1.20751
100150331_TGI_at	-	3.76246	0.000168249	3.47855	1.47412	1.16057
100159026_TGI_at	FCGR2A	3.75783	0.000171395	1.39	2.83707	2.66329
100310034_TGI_at	MATN2	-3.75463	0.000173601	-2.80234	-2.22728	-1.31625
100302547_TGI_at	YAP1	3.75163	0.00017569	2.57699	0.932754	2.94432
100161818_TGI_at	TMEM26	-3.74975	0.000177009	-1.90723	-2.53856	-2.23294
100138029_TGI_at	LIMCH1	3.73826	0.000185301	3.51267	0.323324	2.2391
100154736_TGI_at	NKD2	3.73468	0.00018795	4.05987	0.336173	1.45839
100145551_TGI_at	HS3ST3A1	-3.72539	0.000195017	-4.14636	-0.396678	-1.2579
100146939_TGI_at	NAP1L1	3.723	0.00019687	2.02953	1.39398	3.17751
100144600_TGI_at	CADM3	-3.7146	0.000203527	-2.69236	-1.73879	-1.88774
100151693_TGI_at	RABGAP1L	-3.71144	0.000206087	-4.14844	0.0175133	-1.64982
100313543_TGI_at	HOPX	3.71013	0.00020715	2.41857	1.20928	2.79964
100150788_TGI_at	TSPAN14	3.70203	0.000213877	2.5273	1.26264	2.57794
100136428_TGI_at	-	3.7014	0.000214416	2.42979	2.52619	1.42294
100302568_TGI_at	MAP3K5	3.69717	0.000218016	3.15508	0.597839	2.37409
100300387_TGI_at	MME	3.69581	0.000219188	2.81299	0.329864	3.12024
100311472_TGI_at	ZNF274	3.68996	0.000224285	3.09039	1.27418	1.75952
100147909_TGI_at	MATN2	-3.68942	0.000224769	-3.33486	-1.41723	-1.27272
100132729_TGI_at	LTBP2	3.68407	0.000229541	3.55429	0.762253	1.6254
100139628_TGI_at	TMEM108	3.67824	0.000234847	2.29554	1.78158	2.32312
100147413_TGI_at	PIGZ	-3.66581	0.000246559	-2.11934	-2.56347	-1.74542
100139604_TGI_at	C1QTNF7	3.66463	0.000247699	2.72737	1.09983	2.39145
100303364_TGI_at	VEGFA	-3.66271	0.000249564	-1.80264	-2.09476	-2.65762
100144567_TGI_at	TNRC17	-3.65891	0.000253293	-2.21344	-0.67581	-3.52695
100134891_TGI_at	POSTN	-3.65194	0.000260265	-2.22981	-2.09601	-2.04122
100129242_TGI_at	-	3.64982	0.000262419	3.00033	1.88941	1.17695
100305656_TGI_at	TMEM49	3.64521	0.000267179	1.20287	3.71377	1.80436
100150035_TGI_at	BCAT1	3.644	0.00026843	2.12696	0.0143525	4.29234
100135121_TGI_at	MAP2	3.64026	0.00027236	2.80255	2.13079	1.18646
100136397_TGI_at	-	3.63726	0.000275555	0.903733	3.25785	2.66944
100123589_TGI_at	MME	3.61912	0.000295611	2.51593	0.804863	2.89557
100137477_TGI_at	MTHFD2L	3.61805	0.000296832	2.63227	2.62656	0.873001
100148902_TGI_at	-	-3.61733	0.000297654	-2.49122	-2.82161	-0.868576
100146110_TGI_at	CACNA1C	3.61352	0.000302064	2.11128	2.57532	1.64032
100154349_TGI_at	NRXN2	-3.60987	0.000306355	-3.28533	-1.19505	-1.4097
100310951_TGI_at	FMO2	3.60659	0.000310243	3.84919	1.08306	0.733798
100132596_TGI_at	FMO2	3.60558	0.000311451	3.60736	1.19494	0.953717
100129464_TGI_at	TIMP2	3.60491	0.000312263	2.55245	2.18102	1.41233
100161626_TGI_at	ACP5	3.604	0.000313351	3.381	1.74209	0.706891
100307068_TGI_at	NTRK2	3.59769	0.000321061	3.20776	0.552685	2.14865
100311448_TGI_at	SDCCAG10	-3.59571	0.000323508	-3.26285	-2.17936	-0.408387
100138582_TGI_at	CA3	3.59426	0.000325317	2.1257	0.562236	3.63592
100129441_TGI_at	NTRK2	3.59399	0.000325647	3.20117	0.633428	2.06807
100131938_TGI_at	TGFBR2	3.5836	0.000338891	1.85676	1.53887	2.99194
100303047_TGI_at	ARG2	-3.58137	0.000341799	-1.10239	-2.95547	-2.5905
100305281_TGI_at	VAPA	3.57876	0.000345224	2.10254	2.71918	1.4364
100139741_TGI_at	-	3.57269	0.000353339	3.21916	1.34874	1.27073
100142228_TGI_at	STK16	-3.56919	0.00035809	-1.94012	-1.24683	-3.14534
100154294_TGI_at	-	-3.56187	0.000368224	-1.69879	-1.9873	-2.71062
100144573_TGI_at	C9orf165	-3.55542	0.000377377	-2.79883	-2.55937	-0.585237
100158139_TGI_at	SOAT1	3.55285	0.000381087	2.44644	1.7609	1.88458
100138129_TGI_at	SVEP1	3.54527	0.00039221	3.30571	0.907664	1.54586
100302129_TGI_at	CRIM1	3.5447	0.000393053	3.06918	0.817893	1.96506
100137190_TGI_at	MYH10	3.54126	0.000398222	2.43989	1.4433	2.19463
100140092_TGI_at	ASRGL1	3.53997	0.000400178	2.87674	1.7604	1.26139
100306527_TGI_at	-	3.53918	0.000401369	3.13494	1.66685	0.996432
100134745_TGI_at	TXLNB	3.53045	0.000414861	3.13386	0.323748	2.35093
100160051_TGI_at	TCF21	3.52706	0.000420201	2.12116	0.9054	3.15814
100312617_TGI_at	MME	3.52446	0.000424342	2.51537	0.450529	3.06923
100162367_TGI_at	EMP2	3.5201	0.000431389	3.87191	-0.0601347	1.69627
100150308_TGI_at	-	-3.51883	0.000433447	-1.89392	-2.5131	-1.81717
100150541_TGI_at	-	3.51824	0.000434419	1.48466	1.41837	3.50176
100130110_TGI_at	-	-3.51578	0.000438467	-3.04113	-0.724571	-2.04161
100125037_TGI_at	HOPX	3.51223	0.000444368	2.71555	0.917944	2.28971
100130336_TGI_at	SH3D19	3.50917	0.0004495	4.53211	-0.168268	0.867303
100311467_TGI_at	BAMBI	3.50903	0.00044974	3.22969	1.27863	1.20077
100143982_TGI_at	CLIC5	3.50895	0.000449873	3.2443	2.23757	0.201859
100143587_TGI_at	APAF1	3.50421	0.000457972	2.72008	2.01366	1.14941
100312615_TGI_at	GPR98	3.5006	0.000464208	2.06427	2.16962	1.89454
100132660_TGI_at	RBM20	3.5004	0.000464555	2.35167	2.0995	1.56626
100308922_TGI_at	JMJD1B	3.4976	0.00046947	2.27517	2.15682	1.6085
100306598_TGI_at	-	3.49488	0.000474268	3.23345	1.44885	0.99366
100307183_TGI_at	CNOT6	3.49346	0.000476802	2.20329	2.95754	0.883154
100157904_TGI_at	NLRC5	-3.4921	0.000479246	-1.95716	-1.53128	-2.67777
100156926_TGI_at	OR7E140P	-3.48965	0.000483645	-1.44121	-2.29457	-2.61114
100124879_TGI_at	RARRES2	3.48702	0.000488439	3.01243	0.97753	1.76606
100301207_TGI_at	IL11RA	-3.47982	0.000501748	-1.97279	-0.500815	-3.68301
100135532_TGI_at	-	-3.47832	0.000504568	-3.3841	-0.61767	-1.59936
100310998_TGI_at	-	3.47706	0.000506951	3.1104	1.3228	1.25775
100157449_TGI_at	PAPSS2	3.47435	0.000512095	2.90422	1.03778	1.82972
100308330_TGI_at	PSAT1	-3.47425	0.000512279	-1.96335	-2.888	-1.24929
100309819_TGI_at	SEPP1	3.47367	0.0005134	3.34001	1.22921	1.02738
100124476_TGI_at	GALNT14	-3.47115	0.000518232	-2.85544	-1.53323	-1.38561
100159409_TGI_at	SLC46A2	3.46098	0.000538219	2.17575	2.18449	1.64546
100142647_TGI_at	EXOC6B	3.45433	0.000551667	2.36433	0.250118	3.34383
100141227_TGI_at	HSPB3	-3.45244	0.000555543	-2.1914	-0.703372	-3.11793
100309408_TGI_at	MFAP4	3.45131	0.000557877	2.59287	0.599061	2.66415
100127053_TGI_at	SAMD4A	3.44914	0.00056237	4.32363	-0.704005	1.58403
100313713_TGI_at	IL1R1	3.44478	0.00057152	2.383	0.68553	2.85459
100155448_TGI_at	PAPLN	3.44277	0.000575788	3.32513	0.189084	2.04777
100152963_TGI_at	CRIM1	3.44132	0.000578893	3.34011	0.645963	1.55787
100131957_TGI_at	LRFN5	3.44129	0.000578947	1.57265	1.58985	3.05113
100142015_TGI_at	SMAD1	3.43278	0.00059743	2.60567	1.69653	1.48965
100146809_TGI_at	-	-3.43277	0.000597453	-2.50255	-3.51049	0.217914
100300499_TGI_at	PTEN	-3.42746	0.000609258	-2.13472	-2.38642	-1.42963
100139659_TGI_at	SFRP4	-3.42006	0.000626076	-1.99644	-2.74782	-1.23831
100129528_TGI_at	-	-3.41936	0.00062768	-3.68877	-0.883446	-0.78724
100124981_TGI_at	EZR	3.41894	0.000628645	2.93433	0.699835	2.02227
100309174_TGI_at	-	3.41879	0.000629005	2.96619	0.940256	1.73237
100147134_TGI_at	-	-3.41842	0.000629858	-1.68907	-2.51043	-1.90444
100141143_TGI_at	PRDM7	3.41779	0.000631323	2.42866	2.49601	0.890019
100151549_TGI_at	HK2	-3.41735	0.000632349	-3.0043	-2.41369	-0.173129
100153456_TGI_at	BLM	-3.41295	0.000642632	-1.63316	-2.32358	-2.1619
100161060_TGI_at	LIMK1	-3.41237	0.000643995	-2.19651	-1.53499	-2.18244
100302709_TGI_at	PAPSS2	3.4074	0.000655847	3.12233	0.759502	1.6771
100140292_TGI_at	ACAP2	-3.4071	0.000656582	-3.98222	0.272376	-1.53429
100156645_TGI_at	-	3.40294	0.00066666	2.14698	1.23753	2.53597
100156430_TGI_at	DLD	-3.40163	0.000669849	-3.2373	0.0226354	-2.30387
100312049_TGI_at	UBA5	-3.40099	0.000671423	-2.41322	-1.88322	-1.50326
100155376_TGI_at	-	3.39909	0.000676105	0.574955	3.225	2.68519
100122547_TGI_at	GIPR	-3.39682	0.000681734	-2.14739	-2.57249	-1.1611
100131929_TGI_at	DDIT4	-3.39225	0.000693224	-1.77363	-2.31264	-1.93657
100308793_TGI_at	DCBLD2	3.39179	0.000694385	2.53198	1.07605	2.14344
100302187_TGI_at	LMO7	3.38581	0.000709679	2.70906	1.38821	1.56693
100143465_TGI_at	C14orf53	-3.38573	0.000709883	-2.63667	-1.81983	-1.22698
100301187_TGI_at	TC2N	3.38542	0.000710701	2.11541	2.09752	1.66745
100152388_TGI_at	-	3.38338	0.000716001	2.62584	0.578197	2.50422
100307582_TGI_at	-	3.3817	0.000720386	2.63894	0.693673	2.36486
100309545_TGI_at	CD47	3.37805	0.000730017	2.93423	1.06977	1.56344
100302999_TGI_at	ADRBK1	-3.37732	0.000731952	-0.897609	-2.28957	-3.14784
100309483_TGI_at	XPR1	3.37547	0.000736907	2.22777	2.93252	0.639479
100158077_TGI_at	DPP6	-3.37266	0.000744468	-2.77864	-0.121707	-2.73627
100147953_TGI_at	CFDP1	3.36546	0.000764168	4.09446	0.506932	0.500156
100122947_TGI_at	-	-3.36445	0.00076697	-2.6881	-1.8515	-1.08077
100142426_TGI_at	-	3.36074	0.000777349	2.07845	1.21361	2.57152
100136258_TGI_at	MLL	3.35642	0.000789598	2.51843	0.809125	2.36414
100301387_TGI_at	SEPT4	3.35582	0.000791306	2.79313	-0.118506	2.92768
100149815_TGI_at	ALG14	-3.35429	0.000795702	-3.09046	-1.67472	-0.681697
100137417_TGI_at	PCYT1B	-3.35361	0.000797637	-2.93604	-3.13071	0.590637
100127433_TGI_at	COL28A1	-3.35313	0.000799019	-1.37399	-1.92681	-2.80771
100311894_TGI_at	UBE2J2	-3.35224	0.000801604	-2.1632	-1.59791	-2.04469
100131732_TGI_at	ANGPTL1	-3.35212	0.000801951	-2.63133	-0.937884	-2.06729
100132854_TGI_at	KIAA1467	3.34776	0.000814683	1.98071	1.31942	2.57353
100301996_TGI_at	C4orf43	3.34743	0.000815636	2.10646	1.48694	2.22717
100309397_TGI_at	CCNY	3.34724	0.000816209	2.79396	1.54004	1.21715
100153031_TGI_at	-	-3.34356	0.000827096	-1.91004	-1.54767	-2.43049
100302722_TGI_at	SEPT4	3.34312	0.00082841	2.72975	-0.0166292	2.8865
100127714_TGI_at	AIF1L	3.34267	0.000829764	2.85597	1.5141	1.14833
100162242_TGI_at	FMO2	3.33949	0.000839319	2.97924	1.17027	1.32148
100128942_TGI_at	STAT3	3.33794	0.000844022	2.49485	1.18404	1.97754
100156784_TGI_at	-	-3.33759	0.000845086	-2.94673	-0.719909	-1.8224
100123881_TGI_at	BAMBI	3.33648	0.000848466	3.06355	0.871756	1.5029
100301015_TGI_at	ATP2A3	-3.33302	0.000859094	-2.16776	-1.93539	-1.65569
100155099_TGI_at	PPP2CB	3.33269	0.000860115	2.26162	2.47579	0.973197
100305898_TGI_at	NTRK2	3.33208	0.000862002	3.16074	0.624506	1.61133
100313519_TGI_at	MACF1	3.3312	0.000864711	2.4315	1.11872	2.11881
100309666_TGI_at	JAGN1	3.33109	0.00086507	2.47973	0.526233	2.65609
100137965_TGI_at	CSDA	3.32955	0.000869867	2.23916	1.6193	1.87207
100306726_TGI_at	SFRS4	3.32634	0.00087994	1.53441	2.51093	1.93535
100133535_TGI_at	TPD52L1	-3.32486	0.000884621	-1.88552	-1.86983	-2.09857
100302903_TGI_at	PFDN4	-3.32355	0.000888808	-3.07091	-1.20125	-1.13069
100162901_TGI_at	TCF21	3.32339	0.00088931	2.48237	0.404161	2.76163
100129938_TGI_at	FLRT2	-3.31828	0.000905745	-3.13381	-1.46027	-0.76848
100309780_TGI_at	SORT1	3.31805	0.000906476	2.10577	2.93877	0.688218
100151051_TGI_at	SYT11	3.31781	0.000907274	0.57142	1.95382	3.82514
100140183_TGI_at	-	3.31692	0.000910163	1.84896	1.88315	2.11996
100131842_TGI_at	WNK4	-3.31535	0.000915274	-2.2703	-1.99494	-1.4172
100151646_TGI_at	HNRNPF	3.31046	0.00093144	3.74959	0.243707	1.13841
100123866_TGI_at	SFRP4	-3.30862	0.000937564	-1.80602	-2.89307	-1.13264
100127381_TGI_at	-	-3.30835	0.000938478	-2.67192	-2.02354	-0.815898
100160363_TGI_at	PTGIR	3.30806	0.00093944	2.55407	1.50446	1.50875
100145909_TGI_at	PDE3B	3.3076	0.000940988	2.75109	1.89663	0.833881
100130170_TGI_at	H1F0	-3.30672	0.000943958	-1.82111	-1.50736	-2.52178
100157132_TGI_at	SRP68	3.30394	0.000953348	1.45855	1.42305	3.10615
100130865_TGI_at	CBX4	-3.3038	0.000953824	-2.48657	-1.66519	-1.43008
100307626_TGI_at	SESN1	-3.30347	0.000954968	-2.29636	-0.0890765	-3.30193
100152495_TGI_at	NKIRAS1	3.30268	0.00095764	2.9902	0.895484	1.51326
100131659_TGI_at	COL15A1	-3.30233	0.000958838	-3.94356	0.447893	-1.55831
100137937_TGI_at	ZNF274	3.29765	0.000974976	2.85623	1.05134	1.5304
100312178_TGI_at	WWTR1	3.29743	0.000975729	2.59499	0.807804	2.14152
100147694_TGI_at	TGM2	3.29574	0.000981621	2.44663	0.524856	2.63305
100309373_TGI_at	NCAM2	3.2957	0.000981772	2.95965	-0.0841322	2.54134
100306804_TGI_at	BCAT1	3.29204	0.000994642	1.65341	1.11525	3.12566
100137825_TGI_at	-	3.29104	0.000998177	2.28168	0.89038	2.47996
100132424_TGI_at	SLN	-3.29034	0.00100065	-3.3276	-0.984255	-0.929178
100307678_TGI_at	GPR107	-3.28988	0.00100231	-1.70159	-2.07124	-2.07897
100147250_TGI_at	SLC4A1AP	-3.28851	0.00100718	-3.17625	-1.67048	-0.435692
100308718_TGI_at	PAPLN	3.28833	0.00100782	2.79788	0.533051	2.12176
merck-VZV_OKA_ORF44_s_at	-	-3.28786	0.00100952	-1.59581	-2.30411	-1.98436
100309497_TGI_at	TEX2	3.2833	0.00102601	3.03831	0.131266	2.18753
100126490_TGI_at	GPRC5C	-3.28222	0.00102992	-1.36177	-2.20753	-2.39693
100131640_TGI_at	SLC25A46	-3.28062	0.00103579	-2.60742	-0.278947	-2.63036
100131417_TGI_at	NPTX1	3.27999	0.00103812	2.80863	0.504986	2.11881
100122619_TGI_at	DUSP3	3.27894	0.00104199	1.89252	2.29085	1.56772
100158903_TGI_at	TNFAIP1	3.27785	0.001046	3.31236	0.161637	1.76482
100300299_TGI_at	-	-3.27662	0.00105057	-1.31024	-2.40452	-2.25637
100305278_TGI_at	BAALC	3.2727	0.00106525	2.17426	0.778657	2.7067
100126479_TGI_at	MBD6	-3.2724	0.00106639	-1.88984	-2.02598	-1.82867
100125286_TGI_at	BCAT1	3.26935	0.00107794	2.0908	0.254403	3.35093
100153914_TGI_at	-	-3.26831	0.00108193	-2.97695	-1.56368	-0.781366
100132177_TGI_at	MAPK1IP1L	3.26681	0.00108767	1.6551	2.68067	1.47577
100130701_TGI_at	SRD5A3	3.26655	0.00108866	1.56403	2.63144	1.65205
100136830_TGI_at	RAD1	3.26552	0.00109263	1.82347	2.51681	1.4064
100138479_TGI_at	PLXNB3	-3.26535	0.00109329	-2.18959	-2.473	-0.941918
100150096_TGI_at	MUC16	3.26453	0.00109647	2.66009	1.99013	0.779086
100304758_TGI_at	-	3.26374	0.0010995	1.9242	0.736987	3.07889
100305538_TGI_at	C7orf20	-3.26269	0.00110358	-1.74654	-1.94229	-2.09388
100138911_TGI_at	NTRK2	3.26194	0.00110654	2.9745	0.526023	1.83085
100125193_TGI_at	BOC	-3.26005	0.00111393	-3.0245	-1.47314	-0.791203
100310228_TGI_at	TNFRSF10B	3.25842	0.00112035	1.99096	1.09442	2.61079
100131048_TGI_at	-	3.25381	0.00113868	2.68742	1.84782	0.864955
100134262_TGI_at	PTGFRN	-3.25378	0.0011388	-2.70848	-2.08801	-0.590555
100308273_TGI_at	CLCN6	-3.24994	0.0011543	-1.95956	-2.0408	-1.67189
100307462_TGI_at	ATP13A4	3.24917	0.00115742	3.03175	-0.449617	2.72132
100128259_TGI_at	UBASH3B	3.24915	0.00115752	3.27853	1.38426	0.507122
100143470_TGI_at	C1QTNF7	3.2476	0.00116381	3.1624	-0.301363	2.38536
100145648_TGI_at	CTSF	3.24738	0.00116471	2.22901	0.73084	2.62894
100129397_TGI_at	BAZ2A	3.24735	0.00116487	3.46749	-0.344792	2.00515
100129117_TGI_at	MAN1C1	-3.24645	0.00116855	-1.37466	-3.25135	-1.24265
100146840_TGI_at	ITGB4	-3.24585	0.00117099	-1.6907	-2.5432	-1.5248
100135991_TGI_at	PDIA5	-3.24498	0.00117459	-2.26956	-0.891821	-2.40352
100154315_TGI_at	-	3.24489	0.00117497	1.7844	1.64355	2.3106
100137313_TGI_at	TRPM6	-3.24303	0.00118266	-1.6723	-2.12273	-1.97377
100146797_TGI_at	SLPI	3.24133	0.00118975	2.26023	1.25869	2.03488
100127992_TGI_at	SLITRK2	-3.2413	0.00118987	-2.96791	-1.18024	-1.13134
100313417_TGI_at	ACTN2	3.23866	0.00120091	1.98097	1.46883	2.20327
100122206_TGI_at	MME	3.2359	0.0012126	2.31362	-0.07862	3.31438
100131523_TGI_at	DTNA	3.23424	0.00121966	2.41134	1.54652	1.51707
100302981_TGI_at	CDH11	3.23325	0.0012239	2.36513	0.798904	2.34214
100156439_TGI_at	CDH11	3.23294	0.00122523	2.15237	0.730976	2.70652
100158471_TGI_at	FRZB	3.23145	0.00123165	3.12186	1.03774	1.04315
100142778_TGI_at	MRPL4	-3.23082	0.00123437	-0.875611	-3.26313	-1.89305
100312513_TGI_at	SPTLC3	3.22965	0.00123943	2.666	0.418352	2.3051
100140771_TGI_at	-	-3.22637	0.00125371	-2.4597	-2.60036	-0.358889
100159262_TGI_at	BCL7A	3.22417	0.00126339	4.41164	-0.763369	1.07388
100159632_TGI_at	MYH8	3.21964	0.0012835	1.59712	0.758861	3.42325
100310441_TGI_at	ARL6IP6	3.21803	0.00129074	1.57525	2.70557	1.46411
merck2-CMV_UL33_at	-	3.21611	0.0012994	2.05016	1.95757	1.56348
100134583_TGI_at	NGFRAP1	3.21566	0.00130144	2.88548	1.10811	1.26841
100134706_TGI_at	DHRS9	3.21517	0.00130368	2.27371	1.19	2.0341
100144725_TGI_at	MMP8	-3.21477	0.0013055	-1.31354	-1.24923	-3.30729
100124508_TGI_at	PLXDC1	-3.2144	0.00130717	-2.17568	-1.45827	-1.89508
100126970_TGI_at	STX12	3.21192	0.00131852	2.81148	1.27778	1.19067
100302683_TGI_at	CXCL14	-3.21166	0.0013197	-2.12429	-2.1101	-1.29596
100146052_TGI_at	MME	3.21097	0.00132288	2.20175	0.763121	2.5613
100158683_TGI_at	GPT2	-3.20836	0.00133495	-0.697045	-2.49391	-2.88132
100126543_TGI_at	ABCA6	3.20748	0.00133905	3.35201	-0.170214	1.90804
100146103_TGI_at	STC1	-3.20576	0.00134709	-0.897054	-1.23838	-3.87923
100142451_TGI_at	FOXA1	3.20416	0.00135457	2.52414	0.185585	2.68896
100307364_TGI_at	-	-3.2025	0.00136241	-1.45564	-3.11812	-1.17844
100156325_TGI_at	ANGPT2	3.19978	0.00137533	1.85015	0.503136	3.29291
100145858_TGI_at	SERPINA9	-3.19921	0.00137807	-2.77683	-1.20792	-1.28476
100137492_TGI_at	FCGRT	-3.19904	0.00137888	-1.92269	-1.2537	-2.42479
100122585_TGI_at	SON	-3.19822	0.0013828	-3.38468	-0.879728	-0.772893
100306241_TGI_at	SVEP1	3.19658	0.00139066	2.64111	0.95272	1.72856
100129131_TGI_at	SPTLC3	3.19409	0.00140271	2.17405	0.478063	2.85701
100158815_TGI_at	TC2N	3.19406	0.00140287	2.3248	2.11948	0.97264
100308510_TGI_at	NTRK2	3.19371	0.00140459	3.49027	0.0838686	1.4292
100124891_TGI_at	FAM178A	3.19259	0.00141001	3.08288	1.02805	1.02977
100160185_TGI_at	CGREF1	-3.19157	0.001415	-2.72945	-1.30821	-1.23308
100140451_TGI_at	PGR	3.18703	0.00143741	1.93526	1.14112	2.49826
100149289_TGI_at	STC1	-3.18657	0.00143969	-0.824173	-1.41275	-3.76437
100133466_TGI_at	ERCC4	3.18619	0.00144162	3.22295	1.31581	0.528721
100156420_TGI_at	-	-3.1834	0.00145558	-2.43934	-0.00691415	-2.94774
100302354_TGI_at	LSM14B	-3.18138	0.00146575	-1.2955	-2.27738	-2.21675
100140399_TGI_at	PARD6B	3.17777	0.00148411	3.08101	0.396954	1.64677
100127607_TGI_at	FAM161A	3.17765	0.00148474	2.18552	1.01554	2.25989
100304827_TGI_at	MED29	3.17689	0.00148866	2.36764	1.80809	1.19659
100301817_TGI_at	FCGR2A	3.17662	0.00149003	1.27107	2.47058	2.04408
100301929_TGI_at	C11orf71	3.17652	0.00149056	2.37885	1.89704	1.08952
100126502_TGI_at	AVPR2	-3.1753	0.00149682	-0.964668	-2.49583	-2.44153
100302652_TGI_at	FXR1	3.17451	0.0015009	3.13091	0.141862	1.83119
100159985_TGI_at	-	-3.17218	0.00151299	-1.99687	-1.49456	-2.02241
100300987_TGI_at	FTSJ1	-3.17187	0.00151461	-1.77891	-1.37495	-2.44676
merck2-Measles_ORF-F_s_at	-	-3.17154	0.00151632	-2.81946	-1.29051	-1.08612
100151321_TGI_at	EXOC1	-3.17141	0.00151703	-3.18218	0.651112	-2.56285
100305653_TGI_at	PRKG1	3.16834	0.00153314	3.29972	-0.169907	1.9024
100147060_TGI_at	MME	3.16547	0.00154832	2.39969	0.372623	2.59397
100127472_TGI_at	NAT2	-3.16495	0.00155111	-1.45779	-2.7378	-1.48867
100134927_TGI_at	DAZAP2	3.16273	0.00156299	2.84442	0.720309	1.61565
100127200_TGI_at	EFHA2	3.162	0.00156688	1.02427	2.83492	1.98621
100153900_TGI_at	RRAS	3.1618	0.00156795	2.75735	0.0561413	2.4125
100158367_TGI_at	-	3.16002	0.00157759	1.5552	1.60986	2.49436
100153367_TGI_at	REG4	-3.1594	0.00158092	-2.38105	-1.98546	-0.962131
100302828_TGI_at	EZR	3.15715	0.00159318	2.39694	1.86633	1.05711
100130153_TGI_at	ERAP2	3.15564	0.00160144	2.07957	2.20074	1.15397
100147325_TGI_at	TSHR	-3.15562	0.00160156	-2.67058	-1.31219	-1.23918
100123397_TGI_at	ICAM1	3.15467	0.0016068	1.66307	0.987108	2.9692
100145605_TGI_at	SGK2	-3.1545	0.00160773	-0.858577	-2.7052	-2.3339
100146937_TGI_at	-	-3.15363	0.00161254	-1.72661	-1.80812	-2.0411
100126249_TGI_at	DBC1	-3.15333	0.0016142	-2.80176	-3.58598	1.26774
100150209_TGI_at	CXCL16	3.15224	0.00162022	1.63669	3.55152	0.384448
100128371_TGI_at	NOTCH1	-3.1477	0.00164562	-1.70962	-2.21347	-1.63929
100157775_TGI_at	-	-3.14734	0.00164765	-2.67163	-2.0863	-0.431346
100311535_TGI_at	IGSF10	3.14546	0.00165826	2.10095	1.72455	1.58985
100312014_TGI_at	ZNF682	-3.14316	0.00167132	-1.8132	-1.52496	-2.18882
100125164_TGI_at	ADM2	-3.14113	0.00168296	-1.03905	-2.30767	-2.46205
100141848_TGI_at	CES3	-3.14045	0.00168686	-2.35415	-1.65721	-1.29667
100312809_TGI_at	LUM	3.13969	0.00169127	2.4274	1.58389	1.26815
100309334_TGI_at	ACBD3	3.13917	0.00169427	2.58899	1.66785	0.956887
100302461_TGI_at	PKIG	3.1381	0.00170049	3.76234	-0.608775	1.64697
100161656_TGI_at	C17orf88	-3.13698	0.00170697	-3.31632	-1.05416	-0.567868
100160844_TGI_at	-	-3.13697	0.00170701	-2.69419	-0.306748	-2.19508
100138880_TGI_at	AKR1B1	3.13564	0.00171479	2.1947	1.43637	1.73402
100157747_TGI_at	PRLR	-3.13534	0.00171656	-2.93954	-0.473384	-1.68082
100157205_TGI_at	ADAMTS5	-3.131	0.00174215	-1.92802	-1.77753	-1.74729
100154920_TGI_at	PGC	3.1288	0.00175521	1.33674	2.26637	2.06587
100313117_TGI_at	BACE1	3.12796	0.00176027	2.25581	1.19989	1.87506
100160354_TGI_at	PRELP	3.12772	0.00176167	3.80129	-0.693881	1.659
100127494_TGI_at	CD177	-3.12724	0.00176458	-2.98623	-1.0157	-1.04643
100139159_TGI_at	EFHC1	3.12529	0.00177628	2.14967	2.87746	0.305561
100300818_TGI_at	ACLY	-3.1248	0.00177927	-2.90917	-1.04122	-1.12262
100312993_TGI_at	ABCA6	3.11945	0.0018119	3.2291	0.00769014	1.72189
100140257_TGI_at	-	3.11921	0.00181339	1.7594	1.82618	1.90848
100152252_TGI_at	-	-3.11747	0.00182411	-3.52303	0.659881	-1.9906
100157083_TGI_at	GJC1	3.11594	0.00183359	1.59669	1.10136	2.86767
100127796_TGI_at	DNALI1	3.11382	0.00184683	2.60782	0.733031	1.83402
100132861_TGI_at	KLHDC8A	-3.11225	0.00185664	-2.63808	-1.89765	-0.600531
100155002_TGI_at	RAMP1	3.10877	0.0018787	2.03475	1.43084	1.9084
100135368_TGI_at	PLEC1	-3.10819	0.0018824	-2.07764	-2.98724	-0.259565
100157558_TGI_at	IRF2BP2	-3.10668	0.00189203	-1.51346	-1.14396	-2.92142
100160001_TGI_at	B3GALNT2	-3.10406	0.00190887	-0.866223	-1.66962	-3.27936
100147990_TGI_at	-	-3.10256	0.00191853	-3.66315	0.257285	-1.35536
100144628_TGI_at	KALRN	-3.10251	0.00191888	-3.00091	-1.08692	-0.904073
100313338_TGI_at	TJP1	3.1011	0.00192804	2.16995	1.19785	1.94293
100153254_TGI_at	TNFRSF10B	3.10048	0.0019321	2.09053	0.578581	2.68394
100143900_TGI_at	HS3ST2	3.09841	0.00194561	3.13491	0.860608	0.940591
100155350_TGI_at	PKM2	-3.09836	0.00194594	-2.5314	0.0770349	-2.73596
100135197_TGI_at	ZNF713	3.09831	0.00194631	2.14648	-0.6098	3.8144
100137463_TGI_at	PRKAA2	3.09805	0.00194799	3.50708	0.440589	0.851193
100136459_TGI_at	NAP1L1	3.09734	0.00195266	2.45406	0.241011	2.51689
100153327_TGI_at	-	3.09656	0.00195777	2.54012	0.96342	1.65864
100156940_TGI_at	-	3.09521	0.00196676	1.53861	1.54826	2.45108
100158314_TGI_at	-	-3.09414	0.00197385	-2.42681	-1.6909	-1.06901
100313439_TGI_at	PSD4	3.09242	0.00198535	3.15652	0.921913	0.83606
100306327_TGI_at	GPM6B	3.09207	0.00198769	1.88838	1.54735	1.95966
100133684_TGI_at	PTK2B	-3.09205	0.00198783	-3.25607	0.199817	-1.84152
100143401_TGI_at	-	3.09188	0.00198895	2.6608	1.05767	1.38541
100307563_TGI_at	DDIT4	-3.09157	0.001991	-1.62834	-2.15436	-1.70071
100147002_TGI_at	ABCA8	3.08985	0.0020026	2.46741	1.22439	1.48001
100121791_TGI_at	NEDD4L	3.08637	0.00202616	3.87724	0.0886296	0.672591
100139841_TGI_at	-	3.08186	0.00205711	1.36598	1.04964	3.17317
100134718_TGI_at	JMJD1B	3.08095	0.00206339	2.28862	2.18499	0.730631
100145016_TGI_at	RASA3	-3.08076	0.00206472	-2.50919	-1.21757	-1.41081
100142930_TGI_at	GREM2	-3.07975	0.00207176	-1.44699	-2.48678	-1.59
100155319_TGI_at	PCBP4	-3.0778	0.00208537	-1.53172	-2.81533	-1.13311
100137094_TGI_at	-	-3.07769	0.00208609	-1.28673	-2.14944	-2.15282
100150318_TGI_at	-	3.07723	0.00208933	2.44153	1.83996	0.862756
100310495_TGI_at	-	3.07189	0.00212705	2.2704	2.04142	0.884385
100151104_TGI_at	-	-3.07136	0.00213083	-2.78854	-1.03888	-1.18617
100304984_TGI_at	-	-3.06962	0.00214334	-1.61986	-2.3938	-1.42442
100309954_TGI_at	SLC33A1	-3.06837	0.00215226	-1.82357	-2.52303	-1.00697
100135551_TGI_at	CRTC3	3.06774	0.00215683	2.69525	0.958395	1.39072
100312071_TGI_at	SYT11	3.06743	0.00215907	0.655616	1.92152	3.24204
100301163_TGI_at	BTNL9	3.06732	0.00215987	3.11423	1.07526	0.688356
100144623_TGI_at	-	-3.06671	0.00216427	-1.21081	-1.50662	-2.89235
100160743_TGI_at	FPR3	3.06654	0.00216552	2.99213	1.06624	0.865695
100305740_TGI_at	-	-3.06443	0.00218083	-1.85438	-0.812212	-2.70191
100302697_TGI_at	B4GALT5	3.06309	0.00219067	2.02573	1.00813	2.2612
100159050_TGI_at	LRRC3B	-3.06285	0.00219237	-1.7997	-1.76698	-1.80056
100311754_TGI_at	-	-3.0609	0.00220671	-1.47152	-1.49965	-2.52555
100300636_TGI_at	NTRK2	3.06008	0.0022128	3.19284	0.0156978	1.64577
100158691_TGI_at	MINK1	-3.05923	0.00221909	-1.15745	-2.4031	-2.03686
100155247_TGI_at	-	3.05874	0.0022227	1.62439	1.83608	1.96551
100131669_TGI_at	TMEM49	3.05868	0.00222316	1.26832	2.61855	1.66186
100129201_TGI_at	FBXL19	-3.05762	0.00223105	-1.82067	-2.31471	-1.20211
100154706_TGI_at	ITGA8	3.05722	0.00223401	2.16635	1.29109	1.76535
100309496_TGI_at	PTPRM	3.05699	0.00223569	2.46798	0.433656	2.22057
100122715_TGI_at	VAPA	3.0559	0.00224385	1.93465	1.11184	2.26763
100308360_TGI_at	OMG	3.05573	0.0022451	2.00659	1.88152	1.38198
100308549_TGI_at	PDE3B	3.05557	0.00224634	2.11246	2.73268	0.366037
100133753_TGI_at	ABRA	-3.05375	0.00225998	-2.07387	-1.98979	-1.17406
100138059_TGI_at	-	3.05303	0.00226542	1.70334	3.02603	0.630255
100156338_TGI_at	SNAPC3	-3.05298	0.00226581	-2.27856	-2.03781	-0.839045
100145070_TGI_at	CAV1	3.05232	0.0022708	3.21179	0.560206	1.04839
100303964_TGI_at	ERAP2	3.05218	0.00227183	2.08629	2.04905	1.09321
100157756_TGI_at	-	3.05072	0.00228291	3.45506	-0.217018	1.50015
100136283_TGI_at	NOVA1	-3.05009	0.00228775	-2.61342	-1.02809	-1.39814
100138777_TGI_at	PLUNC	3.04947	0.00229248	3.68265	0.891165	0.0506228
100150009_TGI_at	REV3L	3.04481	0.00232831	2.85877	0.118695	1.97453
100127291_TGI_at	-	-3.04414	0.00233349	-1.07468	-1.90959	-2.62538
100305886_TGI_at	DENND2C	3.04371	0.00233676	1.45995	1.09916	2.916
100312715_TGI_at	SNX25	-3.04343	0.002339	-2.46789	-1.90979	-0.687499
100156581_TGI_at	NCAM2	3.04143	0.0023546	2.7924	0.00404531	2.17702
100162729_TGI_at	LMO7	3.0414	0.00235479	2.75242	1.11281	1.10121
100156466_TGI_at	LSAMP	3.04048	0.00236199	2.35268	1.00424	1.76572
100133165_TGI_at	ZMIZ2	-3.03919	0.00237218	-1.81247	-1.73081	-1.77257
100157279_TGI_at	FCGR2A	3.03844	0.00237806	0.989136	2.33067	2.30327
100142381_TGI_at	SLC1A6	-3.03744	0.00238597	-0.571315	-2.88988	-2.31137
100139603_TGI_at	IL15RA	3.03639	0.00239426	2.41526	-0.175188	2.87401
100137579_TGI_at	C10orf82	-3.03575	0.00239941	-3.14661	-0.789765	-0.871724
100128339_TGI_at	-	-3.03551	0.0024013	-1.49805	-1.64102	-2.29383
100131003_TGI_at	PDIA4	-3.03451	0.00240925	-3.78702	0.303625	-1.09486
100309382_TGI_at	ACTN2	3.03373	0.00241554	1.64129	1.63029	2.10213
100131566_TGI_at	DCBLD2	3.03295	0.00242172	1.21779	3.08797	1.20185
100131801_TGI_at	CLEC5A	3.03203	0.00242912	1.20092	0.963973	3.39066
100126225_TGI_at	-	3.03033	0.00244287	3.394	1.05045	0.251115
100131588_TGI_at	CD47	3.03002	0.00244538	2.10453	1.47966	1.60465
100305522_TGI_at	SFRP4	-3.02969	0.00244803	-1.72753	-2.82555	-0.754669
100307241_TGI_at	TJP1	3.02845	0.00245811	2.20131	1.2486	1.70277
100141490_TGI_at	-	3.02814	0.00246061	1.56709	1.97055	1.84695
100162423_TGI_at	N4BP2L2	-3.02649	0.00247409	-4.35602	1.07968	-1.07992
100162883_TGI_at	LSM14B	-3.02196	0.00251145	-1.72003	-2.27118	-1.31533
100300188_TGI_at	ETV1	3.02059	0.00252279	2.45029	0.153967	2.45798
100300561_TGI_at	KCNAB1	3.01918	0.00253463	1.25803	2.06659	2.16062
100156428_TGI_at	OR7E47P	3.01821	0.00254271	2.55594	0.365913	2.09015
100124569_TGI_at	-	-3.01756	0.00254818	-3.19642	1.24649	-2.84392
100156577_TGI_at	-	3.01725	0.00255082	1.68244	2.21735	1.41311
100147560_TGI_at	KCNAB1	3.01696	0.00255327	1.78188	1.75275	1.74838
100307168_TGI_at	COPS7A	-3.01551	0.00256546	-2.6291	-1.01179	-1.32408
100154807_TGI_at	MAGOH	-3.01485	0.00257107	-1.40504	-1.62985	-2.3933
100148488_TGI_at	SYT7	-3.01485	0.00257109	-2.03084	-1.33622	-1.82318
100137297_TGI_at	C1orf116	3.01399	0.00257839	2.55378	0.167343	2.28734
100142740_TGI_at	ZNF621	3.01295	0.00258725	1.98212	2.24654	0.958254
100124501_TGI_at	NTRK2	3.01273	0.00258907	2.66767	0.8181	1.46257
100141581_TGI_at	KDSR	3.01041	0.00260899	0.131647	2.16463	3.60853
100142387_TGI_at	PTGFRN	-3.0103	0.00260992	-3.22818	-0.758527	-0.739501
100160666_TGI_at	TIAL1	-3.01029	0.00260996	-1.25587	0.0644931	-4.32035
100306683_TGI_at	-	-3.00998	0.00261269	-1.07822	-2.60538	-1.84242
100123254_TGI_at	CLDN18	3.00993	0.00261306	3.00562	0.861842	0.942673
100306592_TGI_at	MCPH1	3.00936	0.00261795	2.41541	-0.188693	2.83372
100159896_TGI_at	-	-3.0093	0.00261853	-1.42107	-2.24302	-1.73432
100122248_TGI_at	-	3.00836	0.00262665	1.62835	2.40963	1.27436
100152912_TGI_at	RBM24	-3.00831	0.00262707	-2.33724	-1.83554	-0.874827
100303397_TGI_at	TMCC1	3.0064	0.00264364	1.87011	0.263358	3.1244
100303772_TGI_at	APP	-3.00593	0.00264772	-0.802167	-2.34105	-2.48772
100303567_TGI_at	OPRM1	-3.00586	0.0026483	-3.62262	-1.65469	0.731919
100303711_TGI_at	ECHDC1	-3.00553	0.00265122	-2.55167	-1.94543	-0.459146
100154478_TGI_at	SYNPO2	-3.00314	0.00267209	-2.49538	-2.30257	-0.168218
100144758_TGI_at	ATP2A3	-3.00276	0.00267547	-1.39916	-2.17698	-1.81912
100306456_TGI_at	PECAM1	3.00188	0.00268321	3.00692	-0.684575	2.50268
100306421_TGI_at	RRBP1	-3.00138	0.00268756	-2.20908	-1.06133	-1.8291
100305066_TGI_at	ITPR1	3.00113	0.00268981	1.54517	1.66449	2.13587
100136528_TGI_at	HOXB6	3.00035	0.00269669	1.84583	1.98784	1.38653
100304929_TGI_at	UGDH	2.99894	0.00270925	2.35917	0.202836	2.49159
100142692_TGI_at	-	2.99674	0.00272879	1.93067	0.86024	2.41197
100153836_TGI_at	-	-2.9957	0.00273814	-1.1976	-2.66495	-1.58728
100152857_TGI_at	PTPRM	2.99557	0.00273936	2.71543	0.29789	1.89276
100300773_TGI_at	RP9	-2.99546	0.00274033	-1.81168	-1.18206	-2.24642
100146427_TGI_at	DVL1	-2.99488	0.00274548	-1.8373	-0.755808	-2.64458
100302819_TGI_at	CHIT1	2.99294	0.00276305	2.66193	0.625464	1.62764
100307531_TGI_at	PHLDB1	-2.99276	0.00276463	-1.66385	-2.99319	-0.598523
100311223_TGI_at	ATG12	-2.99268	0.00276542	-2.1727	-0.773518	-2.15597
100151823_TGI_at	C18orf45	2.9907	0.00278339	0.869028	2.47115	2.2317
100121666_TGI_at	PRLR	-2.98966	0.0027929	-1.66661	-2.04043	-1.56063
100310814_TGI_at	DIO2	-2.98965	0.00279296	-2.09195	-1.34564	-1.67842
100313167_TGI_at	CD177	-2.98838	0.00280463	-3.16739	-0.39391	-1.15234
100154353_TGI_at	ITGA8	2.98795	0.00280853	1.77828	1.45257	2.00186
100125834_TGI_at	FBXL14	-2.98751	0.00281259	-1.59163	-0.403772	-3.33051
100303415_TGI_at	ZNF789	-2.98748	0.00281291	-1.97046	-0.996239	-2.19943
100305453_TGI_at	GPM6B	2.98714	0.00281601	0.538913	2.52631	2.62712
100313352_TGI_at	CREB3	2.98583	0.00282812	3.34468	0.373055	0.922134
100143288_TGI_at	TSPYL2	-2.98565	0.00282977	-1.87332	-2.14177	-1.16196
100160702_TGI_at	R3HCC1	2.98542	0.0028319	2.40256	1.39449	1.18845
100149904_TGI_at	PTPN21	2.98515	0.00283438	4.04307	0.578508	-0.259464
100307770_TGI_at	CABP7	-2.985	0.00283582	-1.19272	-1.62419	-2.63466
100309061_TGI_at	-	-2.98386	0.00284633	-0.825995	-2.05847	-2.69896
100144335_TGI_at	-	2.98375	0.00284737	1.38695	2.18604	1.78897
100151560_TGI_at	HN1L	2.9835	0.00284975	1.7333	2.44789	1.03992
100308882_TGI_at	LITAF	2.98338	0.00285085	1.20801	1.66449	2.56906
100160701_TGI_at	GLI1	-2.98297	0.00285466	-2.30852	-0.306627	-2.42425
100309283_TGI_at	IRF2BP2	-2.98282	0.00285604	-1.38049	-1.43274	-2.56471
100140144_TGI_at	CHST1	-2.98097	0.00287341	-1.88883	-2.16228	-1.11014
100305248_TGI_at	CD59	2.98004	0.00288208	2.43873	0.464291	2.0766
100139228_TGI_at	COL18A1	2.97822	0.00289927	0.994585	2.55592	1.94583
100149516_TGI_at	QSOX1	2.9772	0.00290894	2.37236	1.89824	0.700041
100137573_TGI_at	EDA	-2.97672	0.00291349	-1.84607	-1.07969	-2.26572
100132568_TGI_at	STK39	-2.9762	0.00291844	-2.16456	-2.30329	-0.573563
100141180_TGI_at	DTX4	2.9746	0.00293374	2.44774	0.0352894	2.49094
100151352_TGI_at	SCEL	2.97423	0.00293727	3.06184	0.889462	0.765191
100161418_TGI_at	PRMT8	-2.97329	0.00294629	-3.10189	-0.660421	-0.941354
100306071_TGI_at	PARP15	2.97155	0.00296301	2.36206	1.45269	1.15771
100134664_TGI_at	FAM107A	2.9703	0.00297508	3.19506	0.253949	1.22066
100157638_TGI_at	EDNRB	-2.96973	0.00298062	-1.5995	-2.0024	-1.65298
100155056_TGI_at	GNB4	2.96855	0.00299206	2.57852	0.915961	1.39855
100305454_TGI_at	NLRP1	-2.96785	0.00299895	-2.39507	-0.785816	-1.7849
100162587_TGI_at	NFKBIZ	2.96773	0.00300005	1.36382	2.67634	1.28891
100150179_TGI_at	-	-2.9674	0.00300326	-2.63571	-0.95677	-1.27515
100312497_TGI_at	-	2.96677	0.00300944	2.39802	0.705239	1.86087
100303016_TGI_at	EMP2	2.96553	0.00302167	2.96344	1.11111	0.658451
100148559_TGI_at	C2orf82	-2.96396	0.00303708	-2.70403	-2.04341	-0.0645812
100150727_TGI_at	GEMIN4	2.9616	0.00306045	2.66035	0.216784	1.98436
100307141_TGI_at	GM2A	2.96132	0.00306322	2.67685	1.78118	0.364667
100150868_TGI_at	C2CD2L	-2.95973	0.00307908	-1.03907	-1.21234	-3.21807
100135898_TGI_at	-	2.95908	0.00308554	1.94233	1.60689	1.55887
100131616_TGI_at	TLN2	-2.95886	0.00308779	-2.60479	-1.24141	-1.01066
100132841_TGI_at	SAMD4A	2.95834	0.00309299	2.25109	1.18518	1.55856
100148978_TGI_at	YWHAH	2.958	0.00309647	2.38055	1.12774	1.43655
100151418_TGI_at	-	-2.95744	0.00310202	-0.684783	-3.37532	-1.49892
100309401_TGI_at	CEPT1	2.95475	0.00312924	3.09147	0.754863	0.822528
100305733_TGI_at	-	2.95415	0.00313531	1.94201	2.22032	0.923574
100305714_TGI_at	-	2.95275	0.00314959	2.25737	1.10726	1.6182
100156131_TGI_at	C1orf198	2.9523	0.00315418	2.62097	1.513	0.697977
100135630_TGI_at	-	2.9521	0.00315616	1.6772	0.485057	3.05809
100140981_TGI_at	-	2.95144	0.003163	1.92623	1.78601	1.38323
100151237_TGI_at	RERGL	2.95111	0.00316638	2.65739	0.111732	2.07476
100160979_TGI_at	FREM3	-2.951	0.00316745	-2.81958	-0.86177	-1.08384
100309623_TGI_at	CYBA	-2.94948	0.00318313	-2.27806	-0.672905	-2.02611
100159445_TGI_at	NEBL	2.94843	0.00319391	3.86727	0.121322	0.378159
100313289_TGI_at	-	2.9478	0.00320048	1.68286	0.853011	2.66619
100305407_TGI_at	SMN2	-2.94704	0.00320832	-1.90109	-1.847	-1.34718
100309065_TGI_at	FAM108C1	2.94479	0.00323174	3.34837	0.17196	1.04039
100124103_TGI_at	ADAMTS5	-2.94449	0.00323492	-2.69679	-1.62501	-0.462743
100151800_TGI_at	-	2.94414	0.00323854	2.27923	1.00158	1.67848
100301221_TGI_at	SEPT3	2.94253	0.00325542	2.33654	1.44914	1.13897
100158628_TGI_at	CYBRD1	2.94107	0.00327079	3.44375	-1.14417	2.24332
100136639_TGI_at	SRPX2	2.93986	0.00328356	1.43151	1.7186	2.11651
100302780_TGI_at	PER2	-2.9398	0.00328426	-0.54104	-0.610167	-4.48492
100148997_TGI_at	TPMT	-2.93958	0.00328659	-1.96702	-1.40195	-1.69478
100306611_TGI_at	SLC22A18	-2.93855	0.00329747	-2.81989	0.414634	-2.36098
100154357_TGI_at	-	-2.93789	0.00330454	-2.8945	-0.932677	-0.881244
100121903_TGI_at	-	-2.93699	0.00331414	-2.2488	0.630363	-3.37166
100129733_TGI_at	BZRAP1	-2.93657	0.00331859	-2.55603	-0.399358	-1.89318
100154790_TGI_at	C2orf24	-2.93632	0.00332129	-2.95518	-1.11049	-0.612355
100161087_TGI_at	GDPD1	2.9351	0.00333441	2.17723	1.71941	1.0698
100309940_TGI_at	ORC2L	-2.93413	0.00334482	-2.25653	0.294402	-3.01243
100136959_TGI_at	SNX24	2.93271	0.00336019	2.21371	1.22576	1.51802
100137504_TGI_at	-	-2.93152	0.00337308	-3.11806	-0.134107	-1.37265
100303083_TGI_at	CXCL16	2.9313	0.00337543	1.37119	3.55546	0.309054
100146773_TGI_at	-	2.93064	0.00338263	2.63736	0.100377	2.07338
100301680_TGI_at	ADM2	-2.93044	0.00338486	-1.01382	-1.78877	-2.60662
100157396_TGI_at	ATP6V0D2	2.9303	0.0033863	3.60639	0.25132	0.571965
100311788_TGI_at	MSI2	-2.92976	0.00339226	-2.0661	-2.04739	-0.878937
100148051_TGI_at	IL17RC	-2.92887	0.00340193	-0.818675	-2.83525	-1.80695
100154999_TGI_at	C10orf107	2.92755	0.00341639	3.04096	0.505331	1.09312
100311709_TGI_at	IHPK2	-2.92665	0.00342639	-2.47135	-2.10249	-0.253301
100313459_TGI_at	ANKFY1	-2.92648	0.00342817	-4.10324	0.00507607	-0.135444
100162955_TGI_at	NFYB	2.92618	0.00343149	2.86813	-0.169918	2.01958
100148259_TGI_at	COL18A1	2.92522	0.00344208	1.52992	0.835476	2.85164
100301107_TGI_at	C21orf82	2.92391	0.00345667	1.94925	2.23041	0.842931
100121750_TGI_at	-	-2.92244	0.00347303	-2.45095	-0.538974	-1.8686
100128958_TGI_at	-	-2.92175	0.00348071	-1.88034	-1.79424	-1.37944
100145436_TGI_at	PTPRZ1	2.9211	0.00348793	1.95743	1.55239	1.51778
100134662_TGI_at	PRKACA	-2.92089	0.00349033	-2.81953	-0.980358	-0.90289
100157158_TGI_at	TIMP4	2.92088	0.00349048	2.45319	0.197109	2.21119
100122016_TGI_at	PACSIN3	2.92023	0.00349777	2.99399	-0.299084	1.96458
100161012_TGI_at	BCHE	-2.91838	0.00351855	-2.43311	0.179736	-2.61862
100129915_TGI_at	NPNT	2.91731	0.00353063	2.66071	0.707304	1.39509
100143008_TGI_at	SH3D19	2.91729	0.00353088	3.14964	0.438824	0.989488
100130980_TGI_at	-	2.91642	0.00354078	3.30163	-0.324697	1.55557
100311632_TGI_at	-	2.91554	0.00355071	2.59385	0.490034	1.70618
100149864_TGI_at	EIF3B	-2.91328	0.00357656	-1.45787	-1.58955	-2.15855
100310189_TGI_at	PRMT6	2.90926	0.00362281	3.21095	1.9932	-0.697709
100150240_TGI_at	PLEKHA5	2.90913	0.00362439	3.11536	0.662061	0.793079
100309911_TGI_at	EMP2	2.90889	0.00362714	3.30136	-0.521305	1.74154
100143296_TGI_at	-	-2.90855	0.00363109	-1.6371	-1.63658	-1.85206
100155573_TGI_at	TWF1	-2.90692	0.00365002	-3.00328	0.304927	-1.93111
100311839_TGI_at	TM4SF18	2.90525	0.0036696	2.18322	0.470367	2.27643
100139773_TGI_at	SEMA5B	-2.90508	0.00367163	-1.56041	-1.44244	-2.1498
100150459_TGI_at	-	-2.90473	0.00367576	-2.46255	-1.7864	-0.544363
100161121_TGI_at	-	2.90461	0.00367713	1.68579	1.0989	2.32515
100158249_TGI_at	JAM2	2.90427	0.00368115	3.39924	-1.03316	2.11856
100140052_TGI_at	PTCH2	-2.90406	0.00368363	-1.57298	-2.45318	-1.09899
100304702_TGI_at	SYK	-2.90078	0.00372236	-3.33233	-0.787215	-0.347198
100149526_TGI_at	ABCB6	-2.89956	0.00373687	-1.62847	-1.86695	-1.61107
100150930_TGI_at	ERAP2	2.89777	0.00375828	1.90029	1.98383	1.11047
100146451_TGI_at	MYEF2	2.89755	0.00376096	0.818057	2.4596	2.12866
100151194_TGI_at	ANO9	-2.89588	0.00378093	-2.50942	-0.679802	-1.59072
100149851_TGI_at	-	2.89537	0.00378715	2.20271	1.67552	0.999968
100313419_TGI_at	PTCH1	-2.89519	0.00378927	-3.87678	-0.169279	-0.209903
100161879_TGI_at	PYCR1	-2.89418	0.00380145	-3.30462	-0.436452	-0.730465
100302292_TGI_at	JMJD2A	-2.89275	0.00381884	-1.25992	-1.93266	-2.04265
100139240_TGI_at	-	-2.89273	0.0038191	-1.76893	-1.16727	-2.11616
100122146_TGI_at	GALR1	-2.89256	0.00382112	-2.39953	-1.75488	-0.639871
100146501_TGI_at	SLC6A9	-2.89226	0.00382485	-1.2892	-1.36279	-2.58245
100144500_TGI_at	SFN	2.89061	0.00384497	2.76539	0.229591	1.68382
100152864_TGI_at	tcag7.1228	2.89058	0.00384535	1.80059	2.29087	0.921413
100306108_TGI_at	MSI2	-2.89021	0.00384981	-1.30023	-1.10075	-2.83041
100146540_TGI_at	CARM1	-2.88982	0.00385463	-1.8675	-1.69521	-1.43469
100134132_TGI_at	-	-2.88967	0.00385641	-2.18246	-1.96384	-0.722584
100305138_TGI_at	SPINK5	2.88959	0.0038575	2.36539	1.06437	1.38594
100149887_TGI_at	ZAR1	2.88877	0.00386747	1.81558	1.22292	1.98666
100307960_TGI_at	AMN	2.88804	0.00387652	1.71794	1.04324	2.30422
100161892_TGI_at	ZNF92	-2.88758	0.00388219	-1.11953	-2.12184	-2.03444
100305489_TGI_at	NFYB	2.88723	0.00388653	2.52547	-0.0484625	2.29423
100145435_TGI_at	-	-2.88583	0.00390385	-1.75185	-2.63307	-0.630539
100156746_TGI_at	SUPT16H	2.88564	0.00390624	2.36427	1.95694	0.46889
100133454_TGI_at	CDH11	2.88518	0.00391196	1.79483	0.798031	2.44186
100303514_TGI_at	-	2.88512	0.00391267	2.84683	1.07607	0.695993
100308157_TGI_at	COIL	-2.88306	0.00393839	-3.12977	-0.834737	-0.544905
100311504_TGI_at	FUS	-2.88234	0.00394739	-1.89572	-1.58489	-1.49312
100307973_TGI_at	EZR	2.88228	0.00394808	2.74984	0.187667	1.73162
100146593_TGI_at	CDK2	2.88167	0.00395577	1.6314	2.16356	1.26869
100123181_TGI_at	ZBTB4	2.88163	0.0039562	3.19485	-0.277127	1.5861
100134167_TGI_at	PLAC2	2.88134	0.00395989	3.18754	1.0649	0.226347
100302690_TGI_at	LITAF	2.88127	0.00396073	1.26848	0.565284	3.40308
100162006_TGI_at	ZFP106	2.88081	0.00396652	2.53891	-0.0917372	2.30692
100136051_TGI_at	PTK7	2.88049	0.0039706	2.27652	-0.360126	2.94479
100303854_TGI_at	HLCS	-2.87985	0.00397861	-1.87447	-1.59175	-1.51071
100161967_TGI_at	-	2.87925	0.00398618	2.46122	0.0460428	2.2712
100313576_TGI_at	DPYD	2.87923	0.0039865	1.57838	2.52339	0.970374
100155639_TGI_at	LUM	2.87703	0.00401434	2.20953	1.19095	1.44838
100303708_TGI_at	-	2.87449	0.00404679	1.96992	0.730447	2.24619
100156696_TGI_at	MATR3	-2.8743	0.0040492	-2.8838	-1.66267	-0.0245191
100124616_TGI_at	-	2.87412	0.00405154	2.31949	1.1895	1.29123
100144514_TGI_at	PRCD	2.87397	0.00405346	3.06991	0.42078	1.03236
100124900_TGI_at	ABLIM2	-2.87242	0.00407338	-2.44891	-0.504708	-1.8067
100300033_TGI_at	ABCB4	-2.87086	0.00409351	-1.6905	-2.64136	-0.677504
100309921_TGI_at	ISCA2	2.87067	0.00409607	2.10075	1.52824	1.24272
100145568_TGI_at	RERE	-2.8704	0.00409957	-2.33585	-1.12793	-1.32389
100307644_TGI_at	COPS2	-2.86573	0.0041605	-1.99602	-1.75592	-1.14611
100301868_TGI_at	-	2.86565	0.00416151	2.95722	0.852611	0.731778
100151506_TGI_at	-	-2.86545	0.00416423	-2.70013	-0.635784	-1.30991
100145789_TGI_at	AGXT2L2	-2.86457	0.00417578	-0.336603	-1.82736	-3.37714
100307518_TGI_at	NAV2	2.86353	0.00418943	1.60363	1.65667	1.78834
100311818_TGI_at	-	-2.86302	0.00419621	-1.81661	-0.875669	-2.28821
100128018_TGI_at	-	-2.86301	0.00419637	-1.8418	-1.10128	-2.02299
100313555_TGI_at	PRKD3	2.86296	0.00419705	2.6471	1.46327	0.534336
100159425_TGI_at	BMP5	2.86239	0.00420456	2.4842	1.0427	1.18872
100307467_TGI_at	PAPSS2	2.86212	0.00420819	2.93498	0.653922	0.958374
100303707_TGI_at	PLUNC	2.86198	0.00421004	3.72431	0.578681	-0.0621232
100151536_TGI_at	-	-2.86192	0.00421084	-2.35793	-0.929638	-1.47864
100148008_TGI_at	CD9	2.86187	0.00421143	2.88253	1.34468	0.325985
100132178_TGI_at	FMO1	-2.86084	0.00422514	-3.57339	0.12076	-0.859028
100142383_TGI_at	ELN	2.86046	0.00423024	1.60691	0.797985	2.65382
100135340_TGI_at	CHL1	2.86036	0.00423156	1.29849	0.961304	2.91561
100139232_TGI_at	LIPA	2.85963	0.00424133	2.3575	0.944757	1.45925
100307901_TGI_at	SERPINA2	2.85896	0.00425035	0.435673	0.829598	4.24634
100159444_TGI_at	-	-2.85764	0.00426802	-2.72947	-1.18426	-0.69395
100125593_TGI_at	PAH	-2.8575	0.00426992	-2.2662	-0.740294	-1.7905
100148385_TGI_at	ICAM5	2.85741	0.0042712	1.96422	0.563651	2.39025
100309813_TGI_at	ABCG2	2.8551	0.00430228	2.67343	0.568143	1.39543
100152939_TGI_at	NR2F1	2.85445	0.0043111	2.42748	0.513784	1.7914
100310090_TGI_at	BCHE	-2.8544	0.00431183	-2.4092	-0.099664	-2.23924
100308923_TGI_at	MCPH1	2.85326	0.00432726	2.09856	0.45428	2.30689
100132059_TGI_at	SCARA3	-2.8531	0.00432952	-2.62453	-1.26709	-0.74623
100132143_TGI_at	TRPA1	-2.85307	0.00432994	-3.72525	0.29851	-0.813844
100159890_TGI_at	BNC2	-2.85295	0.00433151	-2.31824	-1.71871	-0.710794
100153616_TGI_at	NDP	-2.85294	0.00433164	-1.88072	-1.31376	-1.73203
100123771_TGI_at	TBX1	2.85269	0.00433509	1.34163	1.0998	2.69906
100307713_TGI_at	-	2.8516	0.00434994	1.67944	0.206147	3.13924
100310769_TGI_at	MAST4	2.85061	0.0043635	1.91955	0.582726	2.41932
100145660_TGI_at	-	2.84877	0.00438888	0.968084	2.07362	2.21676
100310116_TGI_at	FABP3	2.84849	0.00439269	2.75736	0.820275	1.00834
100145387_TGI_at	-	-2.84839	0.00439416	-3.33908	-1.4867	0.480318
100126556_TGI_at	KCNN1	-2.84716	0.00441106	-0.74103	-3.10717	-1.47455
100136465_TGI_at	-	2.84696	0.00441382	2.29704	2.51057	-0.0796418
100131023_TGI_at	AK5	2.84605	0.00442655	1.47637	1.91562	1.66614
100152334_TGI_at	SFTPD	2.84549	0.00443426	2.16301	1.16579	1.47584
100312922_TGI_at	C14orf159	-2.84477	0.00444431	-2.43507	-1.6393	-0.613156
100311422_TGI_at	SPATA7	2.84352	0.00446176	2.15316	1.92062	0.715415
100130469_TGI_at	VWF	2.84279	0.00447206	2.27692	0.130494	2.3685
100121625_TGI_at	TRMT1	-2.84268	0.00447359	-2.11455	-1.4241	-1.27403
100157869_TGI_at	SMAD1	2.84178	0.00448624	2.35825	1.31765	1.04214
100128987_TGI_at	-	-2.83994	0.00451226	-1.3374	-3.18919	-0.547627
100149280_TGI_at	CYC1	-2.83986	0.00451332	-1.8974	-0.9601	-2.04363
100127211_TGI_at	-	2.83756	0.00454598	1.97714	1.01049	1.87681
100142356_TGI_at	C2CD2	-2.83303	0.00461085	-1.51267	-2.61254	-0.87866
100163149_TGI_at	-	2.83284	0.00461366	3.15258	0.0982876	1.16455
100151224_TGI_at	MYH3	2.83267	0.00461614	2.16543	0.827288	1.7923
100128348_TGI_at	SECTM1	-2.83065	0.00464542	-1.52973	-1.07501	-2.419
100149827_TGI_at	-	2.83015	0.00465269	1.41929	1.7943	1.83757
100153793_TGI_at	PCP2	-2.82969	0.00465937	-2.58761	-0.792428	-1.23519
100162561_TGI_at	C20orf7	-2.82934	0.00466438	-2.63493	-0.338686	-1.6317
100140895_TGI_at	KLHL2	2.82906	0.00466847	1.91201	1.03063	1.92984
100301315_TGI_at	MSR1	2.82854	0.00467603	1.97175	1.23285	1.63944
100311376_TGI_at	-	2.8283	0.00467955	1.92051	1.34216	1.59864
100158977_TGI_at	-	2.8256	0.00471927	1.7252	1.14931	2.06146
100153681_TGI_at	NCOA7	2.82522	0.00472481	1.13124	2.25209	1.76098
100126686_TGI_at	-	2.82522	0.00472486	2.31382	0.765439	1.63433
100153580_TGI_at	C8orf54	2.82513	0.00472616	1.19891	0.97594	2.96885
100126719_TGI_at	KLC2	-2.82407	0.00474175	-1.60286	-2.01617	-1.34395
100123853_TGI_at	STK39	-2.8221	0.00477102	-0.965094	-1.17121	-3.08853
100308415_TGI_at	TMEM49	2.82186	0.00477454	1.34156	2.29047	1.42282
100141216_TGI_at	KLHL9	-2.82167	0.00477745	-1.71165	0.0234813	-3.2691
100308172_TGI_at	VSNL1	-2.82084	0.00478981	-2.24974	-1.11227	-1.36078
100159945_TGI_at	FBXO44	-2.8207	0.00479188	-1.56477	-1.31697	-2.1036
100139122_TGI_at	-	-2.81961	0.00480819	-0.744152	-1.80465	-2.74431
100123959_TGI_at	STEAP2	2.81959	0.00480854	0.159018	2.72336	2.62008
100153745_TGI_at	TYK2	-2.819	0.00481739	-2.41226	-2.17892	-0.0428939
100138385_TGI_at	-	-2.81884	0.0048197	-1.05744	-2.29637	-1.80564
100137735_TGI_at	CDKN2C	2.8188	0.00482032	1.92156	1.1828	1.74085
100302772_TGI_at	EDNRB	-2.81875	0.0048211	-1.3034	-1.68312	-2.08936
100140456_TGI_at	IL17REL	-2.8187	0.00482187	-2.52004	-1.97485	-0.100714
100308202_TGI_at	BPGM	2.81868	0.0048222	3.17025	-0.475028	1.69673
100151009_TGI_at	CDCP1	2.81835	0.00482712	2.35453	2.3347	-0.0371243
100301884_TGI_at	CD177	-2.8179	0.00483391	-3.11792	-0.462061	-0.811757
100141722_TGI_at	AACS	-2.81604	0.0048619	-1.54558	-2.13061	-1.29079
100162989_TGI_at	OSGIN2	2.81591	0.00486387	2.94868	1.4242	0.0613099
100161526_TGI_at	-	-2.81534	0.00487254	-1.51531	-2.05409	-1.40954
100311061_TGI_at	EHBP1L1	-2.81405	0.00489211	-2.71254	-1.56471	-0.242404
100142532_TGI_at	AQP3	2.81335	0.00490278	2.256	0.105683	2.36421
100307477_TGI_at	CBFA2T2	-2.8128	0.00491118	-1.42933	-1.01477	-2.58442
100153602_TGI_at	UTRN	2.81177	0.00492703	2.018	1.11273	1.66429
100141420_TGI_at	HS1BP3	2.81097	0.00493928	2.16811	0.156977	2.42927
100306447_TGI_at	PRL	-2.81093	0.00493986	-1.26354	-2.07062	-1.73379
100311072_TGI_at	-	-2.81085	0.00494111	-1.35015	-1.09992	-2.6037
100126529_TGI_at	DIO2	-2.8108	0.00494179	-2.46339	-0.549427	-1.61813
100156300_TGI_at	-	-2.8105	0.00494645	-1.82058	-1.05438	-1.99568
100149406_TGI_at	GTF2F2	-2.81005	0.00495331	-2.78121	-0.0564988	-1.67789
100306838_TGI_at	NCAM2	2.80991	0.00495548	1.96549	0.552749	2.30494
100129666_TGI_at	ANGPT1	2.80924	0.00496585	1.44882	0.804075	2.76523
100311140_TGI_at	TFPI	2.80914	0.00496738	1.9228	0.84171	2.0679
100131305_TGI_at	RASGRF2	2.80896	0.00497015	2.0123	1.83709	0.92752
100305170_TGI_at	VGLL3	2.80887	0.0049715	1.22745	1.16682	2.70203
100139156_TGI_at	-	2.80869	0.00497429	1.96997	1.88691	0.934988
100313138_TGI_at	GMEB2	-2.80757	0.00499162	-2.155	-1.46344	-1.10769
100148744_TGI_at	APOOL	-2.80732	0.00499562	-2.00296	-1.22154	-1.56529
100140018_TGI_at	-	2.80727	0.00499634	2.58468	-0.0171169	2.02059
100158741_TGI_at	CNOT7	2.80712	0.00499864	1.83252	2.90929	0.0796984
100149737_TGI_at	-	-2.80692	0.00500174	-1.74323	-0.898175	-2.25542
100157805_TGI_at	SORBS2	2.80575	0.00502004	1.80459	1.49727	1.55652
100137423_TGI_at	SFTPC	2.80569	0.00502092	2.0418	0.72023	2.01958
100306655_TGI_at	ALDH1A1	2.80534	0.00502636	3.28287	0.0618076	0.965877
100145867_TGI_at	hCG_22804	-2.80502	0.00503134	-3.09229	-0.830871	-0.445406
100145996_TGI_at	CXCL14	-2.80409	0.00504582	-1.72407	-2.03035	-1.12122
100305669_TGI_at	ALDH1A1	2.80362	0.00505324	3.17713	-0.0741727	1.24815
100158731_TGI_at	GPR31	-2.80318	0.00506013	-1.68141	-1.06055	-2.1682
100151169_TGI_at	AOC3	2.80303	0.00506255	2.33467	0.358158	1.97668
100157418_TGI_at	MMP21	-2.80282	0.00506583	-1.71573	-1.76157	-1.4045
100125484_TGI_at	CYP1B1	2.80239	0.0050726	2.88494	-0.619022	2.2077
100307515_TGI_at	PCNX	2.80153	0.00508611	1.67578	1.78659	1.43193
100159192_TGI_at	EBF2	-2.80132	0.00508936	-1.68024	-1.76903	-1.44324
100154311_TGI_at	UNC45B	2.80073	0.00509874	0.677239	2.20276	2.39346
100302234_TGI_at	ICOSLG	2.80067	0.00509967	3.79782	-0.318154	0.628588
100313974_TGI_at	RNGTT	2.80017	0.00510752	1.79089	2.12117	0.927867
100150825_TGI_at	NTN1	-2.7998	0.00511341	-2.41381	-1.51288	-0.682057
100308724_TGI_at	SSH1	2.79922	0.00512256	3.20195	-0.663083	1.80578
100152754_TGI_at	-	-2.79908	0.00512481	-2.25538	-0.518695	-1.91521
100154107_TGI_at	-	2.79799	0.00514225	1.21209	1.0681	2.80241
100134772_TGI_at	HOMEZ	2.79732	0.00515286	2.17918	1.31772	1.20233
100137582_TGI_at	-	-2.79613	0.00517193	-1.0689	-3.30927	-0.710933
100302799_TGI_at	AOC3	2.79494	0.00519099	2.14351	0.424293	2.15876
100150889_TGI_at	FAM107A	2.79466	0.00519537	2.71981	0.65603	1.12083
100147241_TGI_at	FUNDC2	-2.79392	0.0052073	-2.83783	-1.19265	-0.407789
100155291_TGI_at	CYP26C1	-2.79329	0.00521745	-2.75361	-0.821365	-0.902418
100141950_TGI_at	AJAP1	-2.79264	0.00522804	-1.45656	-2.60087	-0.888031
100123970_TGI_at	FKBPL	-2.79219	0.00523529	-1.44378	-0.893521	-2.64697
100139095_TGI_at	TXNDC16	2.7919	0.00523994	1.46078	1.35589	2.151
100130269_TGI_at	-	-2.79068	0.00525971	-3.26342	-0.820787	-0.189275
100312811_TGI_at	IGFBP5	-2.78974	0.00527499	-2.87102	-1.5454	0.00660274
100142955_TGI_at	CSDC2	2.78881	0.00529018	1.88003	0.595285	2.33826
100308106_TGI_at	RPS9	2.7883	0.00529857	2.96498	0.689698	0.733046
100306322_TGI_at	ARNT	2.78818	0.0053005	3.87741	-0.163367	0.335145
100126501_TGI_at	PDZD4	-2.7881	0.00530187	-2.56572	-1.50515	-0.455502
100161389_TGI_at	ORC2L	-2.78793	0.00530453	-2.49302	1.00605	-3.11849
100134839_TGI_at	TGIF1	2.78791	0.00530496	2.58018	0.582134	1.37682
100301196_TGI_at	MS4A4A	2.78715	0.00531747	2.90485	1.01357	0.483861
100162855_TGI_at	DNAJC3	-2.78696	0.00532059	-2.70106	-1.07522	-0.703807
100131242_TGI_at	CBLN1	-2.78582	0.00533928	-1.30735	-2.19216	-1.49883
100146348_TGI_at	OVCH2	2.78492	0.00535416	3.07549	-1.13981	2.43944
100307117_TGI_at	TUT1	2.78388	0.00537136	0.747473	1.2946	3.18889
100146764_TGI_at	SMPD3	-2.78273	0.00539043	-2.36751	-0.702938	-1.53878
100161652_TGI_at	SNORD67	-2.78193	0.00540366	-3.90725	0.0750337	-0.191093
100311069_TGI_at	METT5D1	-2.78102	0.00541876	-1.38083	-1.16634	-2.43383
100312063_TGI_at	GGA2	-2.7803	0.00543092	-2.41534	-1.34348	-0.813902
100151534_TGI_at	IHPK3	2.78009	0.00543446	2.59287	0.182427	1.75142
100141362_TGI_at	C15orf37	2.77999	0.00543609	2.51102	0.755576	1.28017
100301047_TGI_at	tcag7.1228	2.77953	0.0054438	1.14029	3.28117	0.607311
100308658_TGI_at	PLEKHA6	-2.77887	0.00545484	-2.8286	-1.06232	-0.523597
100306739_TGI_at	SPAG16	2.77784	0.00547208	1.63663	1.72347	1.50353
100144764_TGI_at	RP1-177G6.2	-2.77661	0.00549298	-1.7316	-2.27777	-0.803505
100162847_TGI_at	BICC1	-2.77643	0.00549591	-2.89492	-0.724959	-0.770782
100139206_TGI_at	IGFBP5	-2.77637	0.00549698	-2.86807	-1.83321	0.322815
100308580_TGI_at	-	-2.7759	0.00550492	-2.92176	-0.715	-0.742593
100135747_TGI_at	-	2.77583	0.00550618	1.74268	1.87752	1.19495
100128782_TGI_at	OTUD7B	2.77577	0.00550709	1.5185	0.617639	2.79191
100124804_TGI_at	MAN2A2	-2.77567	0.00550886	-1.39408	-2.53191	-1.01141
100154302_TGI_at	ASB6	-2.77526	0.0055157	-1.50288	-2.55993	-0.830812
100146439_TGI_at	PPIL6	2.77486	0.00552256	2.00873	1.38653	1.32424
100148209_TGI_at	-	-2.77451	0.00552857	-2.16521	-2.35095	-0.12203
100162170_TGI_at	TRPC6	2.77414	0.00553477	1.93673	1.12059	1.69423
100145496_TGI_at	CACNA1C	2.77394	0.00553826	2.03934	1.82881	0.828575
100313308_TGI_at	IGFBP5	-2.77367	0.0055427	-2.85643	-1.13218	-0.403283
100304045_TGI_at	CUL4B	-2.77364	0.00554338	-1.55295	-1.98252	-1.34712
100310122_TGI_at	KBTBD10	2.77341	0.00554718	2.79489	1.16789	0.451853
100139820_TGI_at	C2orf12	2.7729	0.00555597	2.69224	-0.500478	2.29579
100158401_TGI_at	-	2.77252	0.00556238	1.28217	2.13281	1.56789
100162905_TGI_at	TMEM180	-2.77223	0.00556741	-2.84074	-0.421667	-1.14716
100148542_TGI_at	-	2.77212	0.00556924	3.19832	-0.138203	1.22126
100137493_TGI_at	PECAM1	2.77123	0.00558448	2.84535	-0.849903	2.43621
100149528_TGI_at	HSD17B6	2.77118	0.0055854	2.25765	0.578325	1.7956
100310330_TGI_at	SCPEP1	2.77007	0.00560439	2.03422	1.41101	1.25429
100125617_TGI_at	TBX15	-2.76888	0.00562502	-1.92585	-0.827313	-1.99809
100313712_TGI_at	MAP2	2.76882	0.0056259	2.29098	1.16622	1.14473
100123586_TGI_at	-	-2.76834	0.00563427	-2.89654	0.481747	-1.98366
100140787_TGI_at	ADAMTS13	-2.76829	0.00563506	-2.20147	-1.64644	-0.778092
100158480_TGI_at	MED24	2.76794	0.00564111	1.96534	0.335842	2.44282
100146583_TGI_at	USP3	-2.76742	0.00565015	-2.55276	-0.0913189	-1.87488
100123132_TGI_at	ANGPTL1	-2.76631	0.00566952	-2.14891	-0.453544	-2.06434
100159220_TGI_at	TMEM25	2.76587	0.00567711	2.13944	1.15418	1.36175
100148217_TGI_at	TRIM24	-2.76578	0.0056786	-2.0791	-1.50585	-1.08661
100146065_TGI_at	MAFG	-2.76491	0.00569385	0.282279	-3.22616	-2.61137
100313772_TGI_at	-	-2.76439	0.00570289	-3.33742	-0.106052	-0.763311
100132385_TGI_at	SNX22	2.7641	0.00570798	3.76858	2.05784	-1.82799
100313036_TGI_at	MS4A7	2.76385	0.00571239	0.894148	2.69324	1.51804
100162921_TGI_at	FAM117A	-2.76329	0.00572227	-2.71485	-0.542091	-1.18143
100131413_TGI_at	UNQ9374	-2.7631	0.00572549	-1.60724	-1.6015	-1.63946
100155457_TGI_at	F11R	2.76275	0.0057317	1.99497	0.986375	1.72751
100147244_TGI_at	-	-2.76208	0.00574346	-1.68304	-0.393896	-2.76424
100156782_TGI_at	-	-2.76171	0.00574999	-1.91727	-0.842301	-1.98044
100123821_TGI_at	MYOC	-2.76123	0.00575843	-1.56421	-2.40048	-0.880282
100157723_TGI_at	SNCB	2.76104	0.00576181	2.85122	0.713168	0.812863
100310798_TGI_at	CES4	2.7607	0.0057678	2.70072	0.218788	1.52579
100130944_TGI_at	TGOLN2	2.76049	0.00577155	2.09064	0.892135	1.6862
100147119_TGI_at	FAM38B2	2.76035	0.005774	1.30869	1.88632	1.75826
100134838_TGI_at	APBB2	2.76025	0.00577571	2.62984	-1.26131	3.13361
100130965_TGI_at	ZNRF1	-2.75868	0.00580358	-2.12803	-2.26404	-0.230832
100308823_TGI_at	VPS18	2.75833	0.00580978	1.8222	1.31889	1.61954
100138158_TGI_at	-	-2.75832	0.00580988	-2.0173	-1.68886	-0.9709
100126786_TGI_at	DCBLD2	2.75776	0.00581987	1.72046	1.32143	1.75722
100131034_TGI_at	-	-2.75736	0.00582694	-2.74037	0.625958	-2.32597
100132619_TGI_at	CDC42EP3	2.75699	0.00583364	1.46998	0.892714	2.54123
100307772_TGI_at	ZDHHC11	-2.7565	0.00584235	-1.04351	-2.35145	-1.64455
100301465_TGI_at	MLXIPL	-2.75637	0.00584461	-0.854918	-2.71749	-1.53292
100310299_TGI_at	CLU	-2.75551	0.00586014	-2.55643	-1.34384	-0.568042
100303588_TGI_at	PDE3B	2.75538	0.00586231	2.53521	1.92753	0.00171549
100130193_TGI_at	-	-2.755	0.00586916	-1.88279	-1.8815	-0.954662
100300087_TGI_at	-	2.75458	0.00587675	1.3925	1.46994	2.05514
100306740_TGI_at	-	-2.75438	0.00588027	-3.13311	-0.814169	-0.30478
100309028_TGI_at	DHX57	2.75415	0.00588454	2.56687	-0.0684741	1.99186
100155523_TGI_at	CBX3	-2.75408	0.00588582	-2.99065	0.895357	-2.24645
100303849_TGI_at	BAT3	2.75384	0.00589002	2.38018	2.04548	0.0937573
100155429_TGI_at	ZNF347	2.75329	0.00590002	1.33429	3.24457	0.322732
100132265_TGI_at	CXCL1	2.75316	0.00590234	1.63232	0.918167	2.28201
100125633_TGI_at	-	-2.75292	0.00590668	-2.66573	-0.862902	-0.901698
100126105_TGI_at	CCDC81	-2.7526	0.00591245	-1.64063	-1.99713	-1.16844
100159063_TGI_at	DICER1	2.75205	0.00592239	2.78076	0.697396	0.908969
100140230_TGI_at	IL11RA	-2.75189	0.00592522	-2.37802	-0.680597	-1.48553
100143756_TGI_at	SLC30A8	2.7516	0.00593043	2.66082	1.04487	0.72023
100125591_TGI_at	-	-2.75157	0.00593108	-2.57955	-1.2559	-0.617781
100312306_TGI_at	MME	2.75148	0.0059327	2.00201	-0.0584699	2.76138
100146898_TGI_at	SLC2A1	-2.75127	0.00593652	-1.36468	-1.68391	-1.86889
100135716_TGI_at	NPL	2.75018	0.00595627	3.11302	0.00977581	1.14508
100140733_TGI_at	RNF26	2.74937	0.00597095	2.03613	1.96215	0.648036
100124333_TGI_at	NAV2	2.74879	0.00598153	1.13722	2.18511	1.66867
100313134_TGI_at	AJAP1	-2.74876	0.00598206	-2.41182	-1.43201	-0.665615
100160318_TGI_at	-	-2.74783	0.00599917	-1.5355	-1.9162	-1.38761
100127967_TGI_at	-	2.7469	0.00601621	1.5493	1.58353	1.706
100140712_TGI_at	WDR33	2.74618	0.00602937	0.481231	3.19446	1.54527
100124409_TGI_at	LDLRAD3	-2.74526	0.00604621	-2.83071	-1.16744	-0.346425
100144565_TGI_at	-	2.74368	0.00607549	1.05676	1.30774	2.66551
100141118_TGI_at	AP1G1	2.74275	0.0060927	2.82943	0.402814	1.12337
100136369_TGI_at	INDO	2.74217	0.00610352	2.04334	0.208953	2.4125
100124654_TGI_at	-	2.74146	0.0061167	2.48864	0.84101	1.14731
100150470_TGI_at	APP	-2.74052	0.00613424	-0.654607	-1.45716	-3.06567
100301757_TGI_at	REEP1	-2.73979	0.0061478	-1.32176	-0.545863	-3.06686
100133128_TGI_at	MCTP1	-2.73896	0.00616346	-2.84771	-0.59364	-0.895701
100158844_TGI_at	TGS1	2.73862	0.00616982	2.22726	0.590072	1.76095
100145837_TGI_at	TIMM13	-2.73843	0.00617342	-1.63064	-1.37894	-1.78482
100149565_TGI_at	-	-2.73816	0.00617839	-2.00987	-1.14713	-1.49378
100136936_TGI_at	-	-2.73792	0.00618293	-1.65944	-1.29613	-1.8283
100309260_TGI_at	KCTD9	2.73655	0.00620876	2.21146	0.544666	1.82512
100151711_TGI_at	PDHA1	-2.73629	0.00621364	-2.07392	-0.283812	-2.28191
100300727_TGI_at	-	-2.73614	0.00621637	-1.43622	-2.43848	-0.969388
100145151_TGI_at	MS4A10	2.73613	0.00621666	1.64151	0.757712	2.39902
100150784_TGI_at	RIC8B	-2.73581	0.00622264	-1.48529	-1.32081	-2.04094
100144516_TGI_at	PRSS23	2.73575	0.00622383	2.11581	0.803696	1.69217
100306320_TGI_at	XPO1	-2.73533	0.00623169	-2.70768	-1.16416	-0.50096
100154918_TGI_at	HOXB3	2.7353	0.00623243	1.58394	2.85366	0.33877
100138993_TGI_at	ADCY2	-2.73522	0.0062339	-3.2083	-0.67944	-0.29955
100306697_TGI_at	ZNF510	2.73356	0.00626541	1.55858	2.91045	0.312606
100143747_TGI_at	-	2.73349	0.00626668	2.33367	0.484106	1.71097
100135040_TGI_at	BAALC	2.73308	0.00627441	1.35113	0.607171	2.95011
100157719_TGI_at	ZMIZ1	-2.73256	0.00628433	-2.15859	-1.77081	-0.639571
100155140_TGI_at	-	-2.73101	0.0063141	-2.50767	-0.23175	-1.72168
100143503_TGI_at	SPNS2	-2.73063	0.00632143	-0.959786	-3.31468	-0.726514
100313988_TGI_at	SLN	-2.72918	0.00634928	-2.15522	-1.16816	-1.25241
merck-NC_004718_ORF_1167_s_at	-	-2.72907	0.00635132	-1.79351	-1.53261	-1.38304
100155497_TGI_at	LAMP3	2.72903	0.00635212	0.934401	2.03242	2.06695
100146308_TGI_at	KMO	2.72796	0.00637265	2.64248	1.0891	0.653472
100126894_TGI_at	EGLN2	2.7277	0.00637778	1.56738	2.44163	0.767055
100147125_TGI_at	GGA2	-2.72711	0.00638921	-2.28987	-1.19831	-1.03039
100160329_TGI_at	HIST2H2BE	-2.72702	0.00639083	-3.10569	-0.0138558	-1.10495
100143028_TGI_at	-	2.72685	0.0063942	1.94173	0.998547	1.71755
100137594_TGI_at	LY6G6D	-2.726	0.00641063	-1.60377	-1.77523	-1.39306
100126622_TGI_at	C1QTNF2	-2.72376	0.00645427	-1.8729	0.297333	-3.12929
100152077_TGI_at	CHD1L	-2.72254	0.00647817	-2.3581	-0.0887924	-2.05855
100129419_TGI_at	BAG1	2.71992	0.00652977	2.35103	2.09574	0.0153746
100147720_TGI_at	C14orf106	-2.71962	0.00653574	-2.12853	-2.42041	0.00727346
100161513_TGI_at	CAMKK2	-2.71922	0.00654365	-2.86035	-0.086214	-1.35653
100132573_TGI_at	HIST1H2BD	-2.71845	0.00655876	-2.67623	-0.711664	-0.972727
100133943_TGI_at	ABT1	-2.71828	0.00656228	-2.12678	-0.935185	-1.50793
100310008_TGI_at	FAM172A	2.71816	0.00656458	2.20407	1.05718	1.2758
100303695_TGI_at	AGMAT	-2.71742	0.00657941	-1.53221	-1.17285	-2.09004
100313025_TGI_at	MAN1C1	-2.71741	0.00657953	-0.262328	-3.5668	-1.41224
100152067_TGI_at	-	2.71712	0.00658521	1.95586	0.493107	2.19424
100300827_TGI_at	LRRK2	2.71582	0.00661122	1.43791	1.60229	1.77973
100124978_TGI_at	SMCR2	-2.71574	0.0066128	-1.8553	-1.16265	-1.64808
100144592_TGI_at	UGCGL2	-2.71542	0.00661908	-2.07073	-0.210878	-2.31918
100135492_TGI_at	TMC7	2.71538	0.00661994	2.17335	1.35957	1.00441
100147073_TGI_at	PLA2G7	2.71485	0.00663053	2.99711	0.137239	1.1057
100148412_TGI_at	STOM	2.71468	0.00663402	2.26636	-0.0583174	2.32048
100305581_TGI_at	UTRN	2.71407	0.00664611	1.30208	1.98252	1.57706
100156986_TGI_at	BAALC	2.71325	0.00666276	1.83269	0.358276	2.49526
100151878_TGI_at	TTC33	2.71309	0.00666587	3.379	2.08419	-1.41511
100143998_TGI_at	-	-2.71304	0.00666691	-1.97498	-1.17418	-1.46459
100309641_TGI_at	C5orf22	2.71091	0.00670982	2.48228	0.761743	1.17615
100163073_TGI_at	C14orf147	2.71054	0.00671747	2.49584	0.0117295	1.92183
100145022_TGI_at	SESN1	-2.71032	0.00672192	-2.01859	0.130427	-2.72971
100134796_TGI_at	COX18	-2.71003	0.00672776	-1.53786	-1.15985	-2.08072
100121734_TGI_at	-	-2.70976	0.0067331	-1.52421	-1.346	-1.90924
100125468_TGI_at	HLA-DMB	2.70958	0.00673686	2.12557	2.25636	0.144225
100136154_TGI_at	MYLK4	-2.70927	0.00674309	-0.934904	-1.06541	-3.01355
100153549_TGI_at	IPO11	2.70924	0.0067438	2.23201	0.904689	1.37477
100131958_TGI_at	-	2.70858	0.00675728	1.70227	1.77385	1.22284
100147273_TGI_at	HIST1H2AB	-2.70835	0.00676196	-0.958094	-2.88686	-1.12098
100122125_TGI_at	GLTSCR2	2.70824	0.0067641	3.18451	-1.63959	2.64505
100127525_TGI_at	SNED1	2.70799	0.0067693	3.26479	-2.21946	3.12464
100305295_TGI_at	CFDP1	2.70789	0.00677131	2.85443	0.488733	0.931477
100132345_TGI_at	-	2.70762	0.00677682	0.717799	2.51227	1.83569
100148523_TGI_at	MAGEB6B	-2.70712	0.00678703	-2.9152	-0.0573928	-1.2856
merck-VZV_OKA_ORF38_s_at	-	-2.70704	0.00678851	-1.44587	-1.52122	-1.8339
100129570_TGI_at	-	-2.70692	0.00679105	-2.83956	-0.418207	-1.02218
100309494_TGI_at	-	2.70666	0.0067963	1.18576	1.92034	1.7874
100159196_TGI_at	DNAJB12	-2.70592	0.00681148	-1.33636	-2.39481	-1.0925
100122391_TGI_at	MT1F	2.70584	0.00681317	3.65153	0.0649601	0.251984
100304743_TGI_at	-	2.70564	0.00681725	1.13422	1.34072	2.4484
100306615_TGI_at	-	2.70496	0.0068313	2.72113	1.62991	-0.0535061
100305707_TGI_at	DDX39	-2.70451	0.0068406	-1.56312	-1.64669	-1.53787
100161840_TGI_at	IL6R	2.70418	0.00684733	2.45258	0.903369	1.0595
100307608_TGI_at	AGXT2L2	-2.70348	0.00686181	-0.543169	-1.04003	-3.57233
100150224_TGI_at	EDNRB	-2.703	0.00687172	-1.68982	-2.25359	-0.739531
100130412_TGI_at	RAD1	2.70114	0.00691016	1.55133	1.65932	1.53467
100154030_TGI_at	CHRM3	-2.70096	0.00691397	-1.90641	-0.46656	-2.25783
100309276_TGI_at	NKIRAS1	2.7006	0.00692149	1.98111	0.5458	2.07245
100308892_TGI_at	RABGEF1	2.70026	0.00692853	1.52071	0.937803	2.31165
100146331_TGI_at	-	-2.6997	0.00694011	-2.29809	-1.07622	-1.08893
100161490_TGI_at	-	2.69812	0.0069733	1.65612	0.722125	2.33925
100157682_TGI_at	MFNG	-2.69773	0.00698145	-0.872472	-1.73719	-2.39187
100137458_TGI_at	C6orf222	-2.69646	0.00700815	-1.83905	-1.25068	-1.5424
100136862_TGI_at	CAV1	2.6964	0.00700941	3.23244	0.368034	0.506376
100303658_TGI_at	CYP1B1	2.69605	0.00701676	2.81041	-0.76727	2.25061
100308769_TGI_at	HN1L	2.69557	0.00702685	1.85794	2.54988	0.188758
100153384_TGI_at	CDC37L1	-2.69534	0.00703166	-2.1318	-0.764759	-1.62912
100302175_TGI_at	FCF1	2.69498	0.00703936	1.18078	2.01741	1.67198
100134814_TGI_at	C1orf116	2.69473	0.00704459	1.99811	0.370382	2.2161
100303739_TGI_at	BCKDHB	-2.69452	0.00704905	-1.06501	-2.24576	-1.59897
100138139_TGI_at	-	2.69437	0.00705222	2.42962	1.52173	0.440918
100126314_TGI_at	VAPB	-2.69406	0.00705869	-1.27396	-1.57841	-1.98859
100132667_TGI_at	SERBP1	2.69343	0.0070721	1.16503	2.38285	1.31792
merck-NC_001405_ORF_1028_s_at	-	-2.69315	0.00707803	-1.59658	-0.0234575	-3.12498
100301842_TGI_at	SSX3	-2.69223	0.00709757	-1.39907	-1.99278	-1.38827
100133180_TGI_at	-	2.69219	0.00709853	2.19842	0.258013	2.04731
100135444_TGI_at	KCNS3	2.69197	0.00710311	4.06042	-0.546916	0.280395
100142621_TGI_at	BTNL9	2.69127	0.00711808	2.68167	1.08354	0.531542
100122002_TGI_at	IL32	2.69001	0.00714494	2.67229	0.994734	0.632682
100124892_TGI_at	ACSBG2	-2.68974	0.00715075	-1.21375	-1.01222	-2.64136
100160180_TGI_at	PLVAP	-2.68964	0.00715283	-1.02538	-1.40909	-2.49802
100124936_TGI_at	-	-2.68958	0.0071542	-2.80719	-1.90279	0.482176
100135668_TGI_at	-	2.68956	0.00715458	1.4253	1.65013	1.69611
100123915_TGI_at	-	2.68919	0.00716253	0.254542	2.97268	1.97302
merck2-Mumps_ORF_NP_at	-	-2.68904	0.0071658	-1.66773	-2.36912	-0.624528
100135427_TGI_at	SERPINB1	2.68865	0.00717413	1.34439	1.07932	2.38917
100127701_TGI_at	CCDC127	2.68852	0.00717697	1.37612	2.16222	1.23987
100157407_TGI_at	IGSF10	2.68852	0.00717703	2.00185	0.805246	1.75481
100301711_TGI_at	SRD5A3	2.68827	0.0071824	1.39315	1.48969	1.90192
100141151_TGI_at	-	2.68814	0.00718502	1.2065	1.23178	2.42423
100311478_TGI_at	HSPA9	-2.68801	0.00718783	-1.13835	-2.20669	-1.52394
100309012_TGI_at	TBX4	2.68744	0.00720025	2.04128	0.469628	2.04031
100305103_TGI_at	CXCR7	-2.68703	0.00720904	-1.74576	-0.997289	-1.91182
100121688_TGI_at	-	-2.68594	0.00723256	-1.43728	-2.41968	-0.887051
100144224_TGI_at	MAPK3	-2.68591	0.00723316	-1.89127	-1.53465	-1.15907
100162750_TGI_at	C10orf112	-2.68583	0.00723501	-2.3623	-2.15464	0.128337
100155088_TGI_at	ADRB2	2.68544	0.00724342	1.67145	0.475927	2.54389
100158990_TGI_at	FCHO1	-2.6851	0.00725081	-2.24772	-0.772675	-1.43954
100149634_TGI_at	ANO6	2.68476	0.00725814	2.40698	1.31526	0.663905
100312532_TGI_at	-	-2.6846	0.00726161	-2.49023	-1.08502	-0.782806
100130763_TGI_at	ZNF354A	-2.68411	0.00727233	-1.31366	-1.42315	-2.072
100142552_TGI_at	C7orf41	2.68385	0.00727797	3.55303	-0.502486	0.924036
100309689_TGI_at	CENPC1	-2.68328	0.00729032	-1.55775	0.256862	-3.44531
100156985_TGI_at	DDA1	-2.68326	0.0072908	-2.30082	-0.423355	-1.71849
100137665_TGI_at	PSMC2	-2.68289	0.00729895	-1.09152	-1.52239	-2.27703
100157063_TGI_at	HS3ST4	2.68286	0.00729964	2.77684	0.79099	0.681005
100134077_TGI_at	GSPT1	2.6827	0.00730311	2.4803	0.101155	1.79668
100311668_TGI_at	NAP1L1	2.68157	0.00732775	0.364789	2.02174	2.7749
100302679_TGI_at	PRDX6	2.68153	0.00732856	0.587639	2.40022	2.07893
100123705_TGI_at	PI4K2A	2.68144	0.00733063	2.71164	-0.0767861	1.65422
100309859_TGI_at	DLD	-2.68126	0.00733451	-3.31847	0.14101	-0.876036
100310271_TGI_at	NTNG1	-2.68078	0.00734518	-2.3622	-0.229704	-1.82583
100309826_TGI_at	HSD17B6	2.68053	0.00735054	2.27435	0.475444	1.69669
100156049_TGI_at	TMEM198	-2.68033	0.00735504	-2.26499	-2.23804	0.089152
100123350_TGI_at	SFRP2	-2.67912	0.00738151	-1.52981	-2.30306	-0.863848
100134228_TGI_at	NAP1L1	2.6791	0.00738208	0.326436	2.02602	2.81891
100305529_TGI_at	PJA1	2.67646	0.00744037	1.77016	1.06451	1.78826
100310029_TGI_at	STOM	2.67631	0.00744384	1.89423	1.00407	1.67719
100149407_TGI_at	PSMD9	-2.67612	0.00744794	-1.20947	-1.45824	-2.16508
100131214_TGI_at	CHIT1	2.67473	0.00747895	2.6429	0.236746	1.41648
100139432_TGI_at	-	-2.67413	0.00749238	-2.51746	-0.742093	-1.07399
100150932_TGI_at	-	2.67409	0.00749319	2.21686	0.477327	1.76184
100130406_TGI_at	POLI	2.67388	0.00749791	2.74137	0.514653	0.994382
100140091_TGI_at	LDLRAD1	2.67375	0.00750092	2.81547	0.547072	0.858052
100141753_TGI_at	FBXW4	2.67326	0.00751179	1.43544	0.458879	2.86502
100310600_TGI_at	-	2.67304	0.00751683	2.70018	1.5969	-0.0543203
100133038_TGI_at	AP2B1	2.67279	0.00752238	0.772991	1.68077	2.53798
100304075_TGI_at	TCF7L2	-2.67258	0.00752707	-2.60875	-1.13894	-0.539103
100156002_TGI_at	-	2.67255	0.0075278	1.41881	2.43787	0.867445
100160813_TGI_at	-	2.67229	0.00753355	0.919191	2.30338	1.69853
100154078_TGI_at	-	-2.67207	0.00753851	-3.40069	-1.337	0.764632
100309712_TGI_at	ZMYM6	2.67201	0.00753983	1.82738	0.232888	2.54839
100131344_TGI_at	-	-2.67192	0.0075419	-2.06122	-0.951602	-1.48989
100312186_TGI_at	PRPF40A	-2.67175	0.00754567	-1.4716	-2.08092	-1.15671
100305760_TGI_at	IBSP	-2.67162	0.00754856	-0.983868	-3.29271	-0.597862
100130236_TGI_at	PLEK	-2.67161	0.0075489	-2.96494	-0.959769	-0.224953
100125821_TGI_at	-	2.67142	0.00755321	2.39286	0.18769	1.80743
100156369_TGI_at	CGN	2.67129	0.00755592	2.11141	2.48789	-0.148644
100153759_TGI_at	NUTF2	2.6711	0.00756032	1.75269	0.476172	2.40215
100125723_TGI_at	NEO1	-2.6702	0.00758071	-2.40539	-0.83523	-1.12687
100303960_TGI_at	CLU	-2.66966	0.0075929	-2.03837	-1.52543	-0.931639
100132313_TGI_at	KBTBD10	2.66918	0.00760368	2.22252	1.26743	0.938005
100132370_TGI_at	GPSM1	2.66878	0.00761283	1.67872	0.115599	2.86823
100158007_TGI_at	-	2.66871	0.00761429	0.972785	0.791568	3.15948
100143302_TGI_at	HIST1H2AC	-2.66744	0.00764311	-3.3837	-0.299642	-0.308222
100160652_TGI_at	THBS1	2.66744	0.00764321	1.13753	1.06722	2.64672
100312802_TGI_at	-	2.66632	0.0076687	2.10674	-0.417083	2.812
100135575_TGI_at	SERPINA3	2.66625	0.00767016	1.55408	0.604172	2.53791
100308005_TGI_at	ZFAND5	-2.66556	0.00768609	-1.57848	-1.27956	-1.81349
100313472_TGI_at	ANXA7	2.6655	0.00768738	2.19405	0.447488	1.80686
100311058_TGI_at	CELSR1	2.66521	0.00769392	1.81629	1.35192	1.40847
100143719_TGI_at	IL6R	2.66451	0.00771013	2.28914	1.42929	0.670951
100311393_TGI_at	HSPA5	-2.66433	0.00771425	-3.12848	-1.33337	0.398038
100140343_TGI_at	TMEM201	-2.66406	0.00772038	-1.81678	-1.32259	-1.43541
100150270_TGI_at	C14orf147	2.66378	0.00772682	2.16833	0.69011	1.59161
100122758_TGI_at	FGD4	2.66377	0.00772708	0.576732	1.85553	2.61445
100159915_TGI_at	TAF9	-2.66373	0.00772788	-0.81644	-2.48084	-1.64321
100309274_TGI_at	SH2D4A	2.66328	0.00773822	1.63992	-0.502361	3.54173
100159681_TGI_at	ZDHHC21	2.6628	0.0077494	2.73538	0.0138648	1.49159
100124053_TGI_at	ST8SIA6	2.66243	0.00775785	2.2096	1.46318	0.742778
100151641_TGI_at	-	2.6618	0.00777244	2.01173	-0.392779	2.91023
100304293_TGI_at	CD109	2.66161	0.0077768	0.844697	0.981543	3.1295
100152936_TGI_at	CBL	2.6616	0.00777713	2.21381	1.05665	1.15006
100136839_TGI_at	TMEM86A	2.66092	0.0077928	3.01095	0.622342	0.484001
100156283_TGI_at	GSTCD	-2.66033	0.0078065	-0.496496	-1.6934	-2.88453
100155068_TGI_at	RLF	-2.65979	0.00781899	-1.65385	-0.251354	-2.74636
100144357_TGI_at	HIST1H2BF	-2.65886	0.00784064	-2.01513	-1.40225	-1.0681
100123656_TGI_at	STEAP2	2.6586	0.00784659	0.818553	2.37328	1.73979
100157826_TGI_at	CIRH1A	2.6577	0.00786761	1.99294	0.817448	1.69333
100311347_TGI_at	GTPBP10	2.65743	0.00787384	0.775308	0.531614	3.67669
100157818_TGI_at	-	-2.65657	0.00789401	-1.39558	-1.67518	-1.6461
100156305_TGI_at	NFKB1	2.65629	0.00790047	1.69291	0.165656	2.77255
100152258_TGI_at	DSCR9	-2.65609	0.00790525	-1.89329	-1.47418	-1.15853
100124806_TGI_at	-	-2.65596	0.0079084	-1.08353	-1.60853	-2.14656
100141622_TGI_at	NPY6R	-2.65585	0.00791078	-2.14479	-1.25741	-1.0297
100301576_TGI_at	PCDHAC1	-2.65582	0.00791148	-1.98422	-1.29035	-1.21919
100161990_TGI_at	CORIN	2.65575	0.00791316	0.965261	1.45738	2.46475
100137153_TGI_at	TMEM130	2.6554	0.00792144	2.6618	0.563307	1.01848
100150530_TGI_at	-	-2.65511	0.00792828	-2.2946	-1.02037	-1.06187
100160276_TGI_at	STON2	2.65429	0.00794764	3.38313	-0.528841	1.12813
100153775_TGI_at	-	2.65376	0.00796009	2.73477	-0.615015	2.11609
100305794_TGI_at	-	2.6529	0.00798031	2.23841	-0.0778213	2.25609
100131094_TGI_at	CHST10	-2.65253	0.00798916	-2.29276	-0.797708	-1.28647
100300337_TGI_at	IL15	2.65239	0.00799245	2.55396	3.00752	-1.33158
100137039_TGI_at	XG	-2.65235	0.00799342	-2.24892	-1.73125	-0.394509
100310836_TGI_at	TRDMT1	-2.65211	0.0079991	-2.958	-0.289225	-0.87992
100301444_TGI_at	BOC	-2.65198	0.00800206	-2.28413	-1.84287	-0.230953
100156916_TGI_at	-	-2.6519	0.008004	-1.31293	-1.7034	-1.72287
100134384_TGI_at	CHD5	2.6507	0.00803245	2.43097	0.189182	1.71166
100153724_TGI_at	PEX19	2.65001	0.00804882	0.782893	3.32521	0.80094
100155655_TGI_at	C3orf60	2.64977	0.00805464	0.909479	2.96537	0.991694
100305289_TGI_at	SH3D19	2.64949	0.00806124	3.86607	-0.730472	0.65313
100134231_TGI_at	-	-2.64815	0.00809335	-2.69436	-1.00163	-0.511543
100150196_TGI_at	-	-2.64762	0.00810614	-1.40768	-3.38112	0.129202
100308687_TGI_at	DSTN	2.64758	0.00810703	0.508675	1.99904	2.53034
100137688_TGI_at	GMPPA	-2.64625	0.0081389	-2.76738	0.23525	-1.66831
100149026_TGI_at	DNAJB11	-2.64585	0.00814867	-2.32386	-0.815801	-1.21148
100133926_TGI_at	PDGFRL	-2.64572	0.00815174	-2.57762	-0.757802	-0.917728
100135954_TGI_at	C2orf67	2.64571	0.00815195	1.14607	1.85588	1.78684
100136672_TGI_at	FSTL3	2.64565	0.00815342	3.2812	-0.0793422	0.793936
100134432_TGI_at	-	-2.64556	0.00815554	-1.24309	-0.790673	-2.73859
100144196_TGI_at	MGAT4B	-2.64514	0.00816576	-1.33952	-0.764337	-2.6306
100124650_TGI_at	GPI	-2.64427	0.00818665	-1.64237	-2.36526	-0.574483
100309723_TGI_at	ARNT	2.64377	0.00819874	2.45642	0.122868	1.73014
100135975_TGI_at	C1orf110	2.64376	0.00819909	2.43087	0.663162	1.21433
100134926_TGI_at	SBNO1	-2.64314	0.00821414	-1.28645	-1.54827	-1.90048
100157606_TGI_at	AMBRA1	-2.64305	0.00821622	-2.12995	-1.03279	-1.254
100308427_TGI_at	SESN1	-2.64241	0.00823195	-1.57518	0.0326464	-3.11083
100153400_TGI_at	CYGB	2.64225	0.00823577	3.78665	-0.942779	0.965685
100125489_TGI_at	SFTA2	2.64196	0.00824282	1.93794	0.793803	1.76251
100307401_TGI_at	CLU	-2.64067	0.0082743	-2.34267	-1.44002	-0.538089
100161476_TGI_at	MT1L	2.63969	0.00829824	2.66111	0.424927	1.12932
100306199_TGI_at	-	2.63875	0.00832118	1.58402	0.497681	2.55014
100137080_TGI_at	C10orf84	-2.63846	0.00832835	-2.17307	-0.663022	-1.56221
100124856_TGI_at	ACAP3	-2.63791	0.00834196	-2.79799	-1.15189	-0.193777
100130882_TGI_at	CFB	2.63787	0.00834274	1.58916	1.39212	1.62861
100143743_TGI_at	DNAJC14	2.6372	0.0083593	3.00382	0.313809	0.761443
100162518_TGI_at	MPP2	-2.63708	0.00836242	-1.84847	-1.16583	-1.49753
100136350_TGI_at	RERE	-2.63649	0.00837699	-1.20031	-0.93776	-2.62987
100135667_TGI_at	RRP15	2.63645	0.00837786	0.825231	1.97924	2.08842
100147307_TGI_at	SH2D4A	2.63631	0.00838123	1.23781	0.739755	2.77945
100155318_TGI_at	CLIC3	2.63611	0.00838624	3.50229	0.692802	-0.32019
100312197_TGI_at	MGEA5	-2.63602	0.00838837	-3.10969	-0.213194	-0.714627
100126974_TGI_at	SLC30A8	2.63588	0.00839199	2.02087	0.0401735	2.4041
100161976_TGI_at	SEMA4G	-2.63571	0.00839618	0.202449	-3.91347	-1.54162
100122154_TGI_at	MTIF3	-2.63492	0.00841565	-0.438791	-2.73244	-1.85392
100308447_TGI_at	RAB8B	2.63449	0.00842649	2.23758	-0.427031	2.57685
100149819_TGI_at	KIAA2018	2.63354	0.00845008	1.23728	1.55817	1.93959
100153568_TGI_at	-	-2.63299	0.00846361	-1.75164	1.2086	-4.04669
100149829_TGI_at	SERTAD4	2.63206	0.00848697	2.82891	1.18884	0.101448
100134190_TGI_at	-	-2.63201	0.00848825	-2.67526	-0.495454	-1.02238
100300306_TGI_at	HLA-DPB1	2.63198	0.00848895	1.26841	1.89802	1.54646
100149577_TGI_at	INPP5J	-2.63185	0.00849209	-2.76161	-0.336283	-1.06447
100122456_TGI_at	RAB15	-2.63182	0.00849281	-0.80858	-2.63121	-1.4371
100130476_TGI_at	DNMBP	-2.63155	0.00849965	-0.330628	-1.36516	-3.39261
100308264_TGI_at	CFB	2.63053	0.00852509	1.71844	1.45326	1.37193
100123811_TGI_at	-	-2.63021	0.00853319	-1.6811	-1.88553	-0.982117
100312837_TGI_at	CTNNA1	2.62979	0.00854369	2.30605	-0.145756	2.18534
100305216_TGI_at	PSMB7	2.62973	0.00854521	2.23876	-1.47933	3.63944
100128966_TGI_at	MTHFD2L	2.62972	0.00854544	1.80207	1.50865	1.19757
100162263_TGI_at	NUDT11	-2.62934	0.00855504	-1.31935	-2.41041	-0.947583
100157038_TGI_at	MYADM	-2.62884	0.00856772	-2.87122	-0.789663	-0.443535
100310066_TGI_at	IL32	2.62871	0.00857103	2.62555	1.23771	0.327541
100126373_TGI_at	ZNF227	2.62852	0.00857572	2.16775	1.14325	1.05979
100155357_TGI_at	FAIM2	-2.62802	0.00858824	-2.41314	-0.456083	-1.4189
100308936_TGI_at	ASMTL	-2.62802	0.00858833	-2.58672	-1.64441	0.0348334
100307743_TGI_at	HLCS	-2.62795	0.00859019	-1.57798	-1.12609	-1.8958
100161711_TGI_at	DCPS	-2.62781	0.00859369	-1.64761	-1.25278	-1.66949
100304400_TGI_at	JAM2	2.62693	0.00861597	2.59725	-0.530146	2.16714
100308961_TGI_at	PXN	2.62615	0.00863565	1.55241	1.70558	1.33649
100151245_TGI_at	CCDC150	2.62587	0.00864284	1.40152	0.461977	2.81454
100309799_TGI_at	CYCS	-2.62508	0.00866275	-2.48782	-1.4098	-0.336144
100157590_TGI_at	-	-2.62506	0.00866339	-2.43351	-0.820165	-1.0132
100137447_TGI_at	CAMTA1	2.62464	0.00867414	1.89317	1.06779	1.51066
100129555_TGI_at	TJP1	2.62453	0.00867691	1.84112	0.115878	2.55405
100301597_TGI_at	FAM107B	2.62366	0.00869912	2.65502	0.0835451	1.45416
100123723_TGI_at	GGCX	2.62351	0.00870291	0.1331	1.66267	3.34755
100126532_TGI_at	MRGPRD	2.62286	0.00871957	3.08622	0.185901	0.748853
100138481_TGI_at	CD59	2.6226	0.0087262	2.06711	0.66806	1.67271
100157482_TGI_at	TARS	-2.62208	0.00873937	-1.59209	-2.12186	-0.848491
100155400_TGI_at	UNQ2550	-2.62207	0.00873984	-2.2773	-0.966288	-1.07524
100301005_TGI_at	IL5RA	-2.62197	0.0087422	-1.34916	-1.39759	-1.92489
100311079_TGI_at	TRPM7	-2.62129	0.00875973	-1.48846	-0.998019	-2.13764
100312736_TGI_at	KLF13	-2.62101	0.00876694	-2.68167	-1.33208	-0.137911
100146969_TGI_at	-	-2.6207	0.00877503	-2.35759	-0.280227	-1.66094
100312159_TGI_at	USP53	2.62	0.00879294	1.89204	1.18495	1.38345
100133724_TGI_at	CCDC21	-2.61984	0.00879713	-1.44527	-1.20162	-1.98702
100125165_TGI_at	SNRPB2	-2.61928	0.00881163	-1.81454	-0.994631	-1.6839
100131063_TGI_at	MAGI1	-2.6192	0.00881359	-2.16748	-0.854675	-1.33603
100148265_TGI_at	LRCH4	-2.61873	0.00882578	-1.7578	-0.999054	-1.75715
100142869_TGI_at	ADAMTS2	2.61824	0.00883833	1.62462	0.119266	2.83896
100311132_TGI_at	STC1	-2.61773	0.0088516	-0.702244	-1.22065	-2.99606
100153366_TGI_at	-	2.61673	0.00887756	0.445231	1.42369	3.14408
100151612_TGI_at	TRMT2A	-2.61672	0.00887801	-1.72766	-1.46024	-1.32446
100312832_TGI_at	SLC25A33	-2.61652	0.00888306	-1.72897	-0.763661	-2.033
100312967_TGI_at	CACNA1C	2.61639	0.00888638	1.07442	1.95049	1.73146
100162747_TGI_at	ID1	2.61551	0.00890941	3.40426	-0.194467	0.680307
100309139_TGI_at	SUDS3	2.61395	0.00895018	2.23827	1.71173	0.352713
100303542_TGI_at	-	2.61345	0.0089632	2.14831	-0.566626	2.80144
100161877_TGI_at	HNRNPU	2.61218	0.00899667	0.935652	0.717963	3.17352
100147823_TGI_at	SYT13	-2.61182	0.00900623	-1.35462	-1.46732	-1.82591
100139222_TGI_at	RBP4	2.61163	0.00901119	2.18978	1.4097	0.72363
100144219_TGI_at	CUGBP2	2.61129	0.00902014	0.69214	2.1223	2.07726
100137204_TGI_at	DPP6	-2.61067	0.00903656	-2.37253	-0.0529009	-1.85214
100143297_TGI_at	AK7	2.60975	0.00906087	1.93272	-0.132022	2.65024
100122748_TGI_at	-	-2.6092	0.00907531	-1.68714	-2.51387	-0.290732
100134847_TGI_at	RHCG	-2.6092	0.00907543	-1.03939	-1.15704	-2.57539
100147306_TGI_at	-	2.6088	0.00908616	-0.106552	2.23869	3.06355
100149732_TGI_at	CXCR7	-2.60832	0.00909879	-2.28367	-0.929789	-1.07622
100127970_TGI_at	FAM161A	2.60763	0.00911722	1.70425	0.639724	2.17609
100160123_TGI_at	-	-2.60634	0.00915145	-2.2268	-0.44124	-1.64981
100306860_TGI_at	CCAR1	-2.6063	0.00915265	-2.84194	-2.00901	0.804857
100127787_TGI_at	TRMT5	2.60592	0.00916274	1.11445	1.65234	1.95917
100147132_TGI_at	EIF4G3	-2.60558	0.00917181	-1.94015	-1.66838	-0.794582
100148090_TGI_at	KIFAP3	2.60541	0.00917648	2.12274	0.814018	1.4122
100127501_TGI_at	MEST	2.60482	0.00919233	1.75042	-0.441363	3.2094
100136489_TGI_at	NEBL	2.60478	0.00919321	4.09566	-0.127913	-0.369878
100131404_TGI_at	SLC30A8	2.60465	0.00919678	2.762	0.343927	1.00192
100303468_TGI_at	RP13-36C9.6	-2.60422	0.00920829	-0.922825	-1.67705	-2.19688
100127363_TGI_at	-	2.60412	0.00921112	1.04003	2.57705	1.11548
100126172_TGI_at	IFT80	2.60355	0.0092263	1.83371	1.24516	1.37029
100131819_TGI_at	GIGYF1	-2.60276	0.00924758	-1.28299	-2.00981	-1.3539
100157057_TGI_at	AIM1	2.60203	0.00926747	1.60885	1.11446	1.81311
100162970_TGI_at	ITPR1	2.60196	0.00926918	1.86408	0.840349	1.73796
100310152_TGI_at	CEACAM6	2.5991	0.00934677	2.38945	0.95576	0.884348
100123126_TGI_at	-	2.5981	0.00937399	1.41954	2.31393	0.844518
100312910_TGI_at	ACAP2	-2.59793	0.00937865	-3.07025	0.754245	-1.68064
100131978_TGI_at	RPS6KB2	-2.59746	0.00939156	-2.1948	0.110074	-2.23911
100310215_TGI_at	BAP1	-2.59744	0.0093921	-1.07707	-2.3657	-1.26635
100143658_TGI_at	CMTM7	2.59698	0.00940478	0.795522	1.60702	2.43082
100153295_TGI_at	PA2G4	2.59663	0.0094143	1.4953	1.61726	1.44715
100139367_TGI_at	CTSS	2.5962	0.00942607	2.14327	2.52142	-0.376806
100148954_TGI_at	SCPEP1	2.59612	0.00942822	1.55496	1.53347	1.44871
100145032_TGI_at	-	2.59612	0.00942823	1.07688	2.26995	1.36168
100147922_TGI_at	THBD	2.59583	0.00943631	2.11214	0.64854	1.57669
100126232_TGI_at	VGLL3	2.59578	0.00943775	1.05086	0.879187	2.81621
100139045_TGI_at	-	2.59534	0.00944964	1.79163	0.294805	2.3821
100300393_TGI_at	VWF	2.59429	0.00947865	1.9848	0.039107	2.37243
100302864_TGI_at	RPA1	2.59321	0.00950843	1.80265	1.33301	1.3032
100135655_TGI_at	ZNF276	-2.59315	0.00951026	-1.38531	-2.44536	-0.74811
100131278_TGI_at	SFTA3	2.59313	0.00951058	2.40246	0.527941	1.29089
100300326_TGI_at	RBAK	-2.5928	0.00951989	-1.97925	-0.354676	-2.05517
100151075_TGI_at	ULK3	-2.59257	0.00952624	-0.124368	-2.41709	-2.52825
100142181_TGI_at	-	-2.59243	0.00953008	-2.89435	0.4276	-1.58084
100150420_TGI_at	PRKAA2	2.59159	0.00955348	1.52766	1.02473	1.99669
100124766_TGI_at	CSNK1G2	-2.59148	0.00955654	-1.86351	-0.807712	-1.75115
100306086_TGI_at	FRS2	2.5913	0.00956145	1.16652	1.82451	1.68198
100305997_TGI_at	ZCCHC11	2.59091	0.00957224	1.3095	1.06339	2.25909
100310027_TGI_at	ATAD1	2.59057	0.00958166	2.66005	0.605786	0.848366
100158214_TGI_at	RLBP1	-2.59045	0.00958505	-1.23104	-0.698097	-2.73995
100142834_TGI_at	TGFBI	-2.59042	0.00958586	-2.11661	-1.01636	-1.1844
100308034_TGI_at	DYNC1LI2	2.59037	0.00958721	3.05871	1.22815	-0.341113
100162235_TGI_at	CD109	2.58928	0.00961778	1.18925	1.22286	2.26024
100308805_TGI_at	NPL	2.5891	0.00962274	3.00832	0.33542	0.637273
100161838_TGI_at	-	-2.58881	0.00963079	-2.19171	-0.939377	-1.15536
100161146_TGI_at	-	-2.58865	0.00963542	-2.43901	0.00526508	-1.7752
100303596_TGI_at	ALDH1A1	2.5866	0.00969268	2.9112	-0.0602933	1.17103
100146825_TGI_at	TNFAIP8L1	2.58644	0.00969742	1.91129	0.696334	1.78834
100306799_TGI_at	TLE3	-2.58632	0.00970071	-1.24098	-2.46447	-0.915596
100307019_TGI_at	STEAP2	2.5862	0.00970419	0.190158	2.45826	2.38211
100154788_TGI_at	-	-2.5859	0.00971245	-0.892923	-1.42335	-2.46079
100146632_TGI_at	PSMD14	-2.58491	0.00974036	-1.87605	-0.723545	-1.80652
100160533_TGI_at	-	-2.58476	0.00974465	-1.6875	-1.37664	-1.40187
100132120_TGI_at	IPO5	2.58459	0.00974941	1.239	1.12721	2.27936
100302830_TGI_at	TNFRSF4	2.58427	0.00975859	2.77559	0.762288	0.515529
100131606_TGI_at	UNC13B	2.58413	0.00976247	3.12214	1.36581	-0.582169
100160333_TGI_at	CXorf59	2.58337	0.00978407	1.97478	0.517601	1.87636
100145767_TGI_at	C14orf26	-2.58307	0.00979247	-0.977	-1.80405	-1.94986
100310745_TGI_at	LIPA	2.58193	0.00982504	2.91652	0.76233	0.31496
100154614_TGI_at	-	2.5815	0.00983719	1.62638	1.41385	1.44236
100132270_TGI_at	RAB24	-2.58134	0.00984186	-1.63126	-1.20184	-1.65157
100145397_TGI_at	SSH1	2.58063	0.00986201	2.75665	-1.08422	2.41867
100145430_TGI_at	RNMT	-2.57993	0.00988198	-1.90538	-0.972378	-1.50193
100153321_TGI_at	-	2.57986	0.00988391	2.95704	-0.643561	1.68903
100129795_TGI_at	SLC5A1	-2.5798	0.00988587	-0.970363	-1.51095	-2.25161
100307120_TGI_at	BAALC	2.57977	0.00988657	1.3979	0.235428	2.95885
100129207_TGI_at	FMO2	2.57976	0.00988679	3.01381	1.30612	-0.379414
100148947_TGI_at	FOXD1	-2.57908	0.00990624	-1.54455	-1.80082	-1.15643
100152989_TGI_at	-	-2.57898	0.0099092	-2.27191	-2.02793	0.0863847
100145946_TGI_at	SESTD1	2.57878	0.0099149	2.02045	1.83985	0.454602
100154892_TGI_at	ADO	-2.5786	0.00992019	-1.74276	-0.941348	-1.75694
100159820_TGI_at	-	-2.57845	0.00992437	-1.64284	-1.49262	-1.33304
100312907_TGI_at	SNX33	2.57842	0.00992521	2.15341	-0.216449	2.36723
100300007_TGI_at	-	2.57829	0.00992896	2.20558	0.821445	1.23546
100160423_TGI_at	-	2.57826	0.00993002	0.682002	1.96444	2.18658
100134055_TGI_at	CYP27A1	2.57817	0.00993263	1.87331	2.14279	0.34876
100125010_TGI_at	CTSG	2.57751	0.00995151	2.25705	0.764169	1.2208
100121639_TGI_at	PRDM16	2.57744	0.00995345	1.9989	0.816674	1.52587
100302919_TGI_at	CEACAM6	2.57701	0.00996592	2.58602	0.541566	0.989739
100133785_TGI_at	-	2.57682	0.00997138	2.33853	0.541552	1.33334
100122607_TGI_at	ODF3L2	-2.57637	0.00998439	-2.68366	-1.12644	-0.255987
100134724_TGI_at	TMEM178	2.57571	0.0100035	2.48551	1.14731	0.508765
100160796_TGI_at	-	2.57458	0.0100362	1.83192	1.16957	1.39216
100131482_TGI_at	HS2ST1	-2.57422	0.0100467	-1.18509	-0.684231	-2.7856
100122367_TGI_at	ARHGEF19	-2.57394	0.0100548	-3.70658	-1.28839	1.33573
100148229_TGI_at	-	-2.57389	0.0100562	0.127625	-3.00163	-2.24481
100311274_TGI_at	TMEM49	2.5738	0.0100589	0.754024	1.98693	2.05465
100302180_TGI_at	-	-2.57377	0.0100598	-3.01595	-0.754741	-0.168263
100309426_TGI_at	CARM1	-2.57263	0.010093	-1.39066	-1.66536	-1.49565
100130631_TGI_at	CTF1	2.57235	0.0101011	3.0691	0.625485	0.223453
100303212_TGI_at	ZNF99	2.57222	0.0101048	2.02739	0.599303	1.69766
100309848_TGI_at	SNX22	2.57199	0.0101116	3.18888	2.12595	-1.47473
100312341_TGI_at	SOX10	-2.57144	0.0101275	-1.57236	-2.01237	-0.8867
100300588_TGI_at	TCF15	-2.57104	0.0101394	-1.00807	-2.53997	-1.1318
100152363_TGI_at	TMED10	-2.57104	0.0101394	-0.936506	-2.03833	-1.7431
100305675_TGI_at	STX12	2.57015	0.0101655	1.06773	1.58429	2.02222
100161578_TGI_at	FUSIP1	-2.56997	0.0101708	-2.69749	0.654109	-2.04078
100131693_TGI_at	-	-2.56985	0.0101742	0.0463853	-2.96865	-2.1575
100134526_TGI_at	ACVR1C	-2.56885	0.0102037	-1.42542	-1.37139	-1.73976
100135422_TGI_at	SPG7	-2.56877	0.010206	-1.81321	0.419308	-3.02778
100147570_TGI_at	FAM19A2	-2.56851	0.0102136	-2.12127	-2.3897	0.26702
100155778_TGI_at	EIF4EBP2	2.56775	0.010236	2.46467	-0.183382	1.87964
100160445_TGI_at	MT1G	2.56759	0.0102409	3.92328	-0.373147	0.0457758
100134086_TGI_at	-	-2.56703	0.0102573	-1.50441	-1.52317	-1.4715
100123837_TGI_at	CD59	2.56651	0.0102728	2.06071	0.203276	2.04405
100138419_TGI_at	-	2.56629	0.0102792	2.11068	1.53779	0.612507
100304359_TGI_at	SCARA5	-2.56599	0.0102883	-2.76698	-1.33416	0.0924361
100139147_TGI_at	-	-2.56475	0.0103251	-2.60347	0.85181	-2.36277
100301709_TGI_at	OGFOD2	-2.5641	0.0103443	-1.50186	-0.745094	-2.2631
100153891_TGI_at	-	-2.56339	0.0103655	-2.23424	-1.64944	-0.321089
100153344_TGI_at	OFCC1	2.56337	0.0103663	2.27015	1.52642	0.396646
100154439_TGI_at	ANO4	-2.56304	0.0103759	-2.14801	-0.924516	-1.17991
100149054_TGI_at	OR9A2	-2.56297	0.010378	-2.29285	-1.18091	-0.716852
100128932_TGI_at	-	2.56285	0.0103817	1.80328	2.02538	0.535362
100146276_TGI_at	KIAA0415	-2.56237	0.010396	-1.22008	-1.67408	-1.70338
100149208_TGI_at	SCRIB	-2.56208	0.0104047	-1.60531	-2.17771	-0.653538
100135621_TGI_at	FRK	2.56168	0.0104168	2.81881	0.518303	0.659386
100140642_TGI_at	DDX39	-2.56161	0.0104188	-1.48854	-1.66813	-1.33483
100312676_TGI_at	CREBBP	-2.5606	0.0104493	-1.85936	-0.982376	-1.51715
100154926_TGI_at	SFTA1P	2.56049	0.0104526	1.74192	0.0915173	2.58913
100302338_TGI_at	METTL5	-2.56037	0.0104561	-1.44626	-1.72606	-1.33201
100130934_TGI_at	FAM120A	-2.55997	0.010468	-2.27618	0.0194879	-1.95887
100139779_TGI_at	-	2.55932	0.0104877	1.0646	0.732498	2.87411
100312196_TGI_at	FXC1	2.55932	0.0104878	1.71271	2.10969	0.568166
100129170_TGI_at	-	2.5589	0.0105004	1.61396	0.915623	1.92294
100161630_TGI_at	BNIPL	2.55874	0.0105052	2.02519	0.808881	1.46001
100310851_TGI_at	ACTR1A	2.55786	0.0105318	1.2727	2.6556	0.619776
100306011_TGI_at	MYSM1	-2.55709	0.0105553	-2.51597	1.03744	-2.65851
100154095_TGI_at	-	-2.55702	0.0105572	-1.80198	-1.56914	-0.991075
100137872_TGI_at	ANKRD56	-2.55689	0.0105613	-0.886548	-1.1401	-2.70083
100122943_TGI_at	C11orf68	2.55652	0.0105725	1.58694	1.24395	1.62075
100136724_TGI_at	-	-2.55561	0.0106003	-2.02775	-1.21034	-1.04058
100131379_TGI_at	JAM2	2.55383	0.0106546	2.49848	-0.28793	1.91156
100160745_TGI_at	CEACAM6	2.55371	0.0106581	2.40056	0.863786	0.872287
100306250_TGI_at	-	2.55311	0.0106765	0.796146	2.64325	1.28522
100155819_TGI_at	SEMA3E	2.55298	0.0106807	1.70988	1.96376	0.708358
100127804_TGI_at	MFAP5	-2.55216	0.0107057	-2.30887	-1.34149	-0.509185
100302200_TGI_at	TANC2	2.55202	0.0107101	1.04472	1.01527	2.59866
100309183_TGI_at	CCND2	-2.55185	0.0107151	-3.02648	-0.625584	-0.241733
100301799_TGI_at	TEAD1	2.55178	0.0107173	2.17002	-0.383309	2.4613
100141433_TGI_at	RREB1	-2.55125	0.0107338	-2.13897	-1.21771	-0.869796
100149810_TGI_at	SFRS14	-2.55001	0.0107721	-2.47775	0.887196	-2.54422
100135522_TGI_at	PRKRIP1	-2.54988	0.0107761	-2.49174	0.617685	-2.24952
100137095_TGI_at	RCOR1	2.54955	0.0107861	0.67429	2.14539	1.95547
100304019_TGI_at	EPB41	-2.5486	0.0108155	-1.16632	-1.2262	-2.20764
100148110_TGI_at	FLRT3	2.54842	0.0108213	1.7858	0.609395	1.97568
100311834_TGI_at	-	-2.54802	0.0108335	-2.2416	-1.81055	-0.115838
100139646_TGI_at	HSPA5	-2.54801	0.0108341	-3.21666	-1.64215	1.0675
100310400_TGI_at	JAM2	2.54793	0.0108364	3.09402	-1.01713	1.81617
100307892_TGI_at	ZNF582	2.54785	0.0108389	2.519	0.563046	1.00285
100154970_TGI_at	RIF1	-2.54785	0.010839	-1.86495	-1.14432	-1.31874
100150149_TGI_at	FZD6	2.54736	0.0108543	1.92715	2.20411	0.149958
100137806_TGI_at	LRCH1	2.54665	0.0108761	2.2514	2.04552	-0.140255
100140637_TGI_at	NCAM2	2.54647	0.0108818	2.162	0.387416	1.67545
100127948_TGI_at	CYP4V2	2.54647	0.010882	1.522	1.53929	1.38961
100163112_TGI_at	-	-2.54582	0.0109023	-1.31418	-1.84707	-1.3631
100302862_TGI_at	SFRP2	-2.54563	0.0109081	-1.97655	-1.76723	-0.523631
100304113_TGI_at	CES4	2.54533	0.0109175	2.55605	-0.0241753	1.54549
100161055_TGI_at	FBXO34	2.54533	0.0109175	2.87164	1.43903	-0.38608
100131771_TGI_at	LRRC9	-2.54519	0.010922	-2.6847	-1.10328	-0.216034
100312027_TGI_at	ZNF382	2.54493	0.0109298	2.47722	0.768412	0.84556
100136757_TGI_at	PARD3	2.54484	0.0109328	1.9306	-0.0381665	2.42804
100157821_TGI_at	LAYN	2.54444	0.0109454	2.35911	1.11449	0.655598
100125972_TGI_at	ZNF682	-2.54439	0.0109469	-1.7004	-1.34998	-1.33069
100140352_TGI_at	HCK	-2.54427	0.0109506	-3.9423	0.0385129	0.368579
100152084_TGI_at	-	2.54421	0.0109525	1.40598	0.738137	2.36381
100153818_TGI_at	C10orf47	2.54346	0.010976	2.12818	-0.621532	2.74593
100125641_TGI_at	NPL	2.54288	0.0109944	2.51296	0.612464	0.950914
100124334_TGI_at	DSC2	-2.54188	0.0110258	-1.35254	0.0272032	-3.21434
100159513_TGI_at	-	-2.54148	0.0110384	-1.58879	-2.14055	-0.673359
100158900_TGI_at	TFPI	2.54139	0.0110414	1.53372	0.931173	1.98368
100157152_TGI_at	TMEM108	2.54136	0.0110423	1.16926	1.00672	2.41306
100128807_TGI_at	-	-2.54119	0.0110476	-1.25282	-1.4205	-1.8744
100311556_TGI_at	YARS	-2.54076	0.0110613	-2.10633	-1.50409	-0.602053
100128130_TGI_at	JMJD4	2.54041	0.0110721	0.921077	1.58612	2.16492
100132151_TGI_at	BPGM	2.53905	0.0111154	2.71149	-0.340689	1.63991
100133718_TGI_at	SGPP2	2.5376	0.0111615	2.2731	0.271091	1.62207
100142576_TGI_at	CABLES1	2.53753	0.0111639	1.79911	1.19553	1.33741
100155894_TGI_at	MDS2	-2.53742	0.0111674	-1.61552	-0.823806	-1.97163
100140926_TGI_at	-	2.53701	0.0111804	2.05029	-0.0757729	2.28446
100129445_TGI_at	C15orf59	-2.53696	0.011182	-1.80968	-1.57697	-0.9324
100155320_TGI_at	PEX13	2.53685	0.0111856	0.76397	2.12744	1.82382
100139632_TGI_at	-	-2.53562	0.0112248	-2.37127	-0.815766	-0.92593
100306867_TGI_at	PAK2	-2.53552	0.0112279	-1.7164	-1.78359	-0.84835
100142146_TGI_at	-	-2.53551	0.0112283	-1.80663	-0.447491	-2.0862
100133373_TGI_at	CCDC91	-2.53501	0.0112443	-3.3056	-2.25797	1.84535
100152394_TGI_at	TNRC6B	-2.53468	0.0112551	-2.53464	-0.0862877	-1.44131
100148354_TGI_at	FAM135A	2.53449	0.0112613	2.50636	1.71824	-0.184919
100159801_TGI_at	CES7	2.53437	0.011265	1.97496	1.20554	1.07652
100147463_TGI_at	-	-2.5343	0.0112671	-1.12726	-1.46257	-1.99225
100309363_TGI_at	CTSC	2.53411	0.0112733	1.67247	0.17538	2.54752
100142211_TGI_at	PTTG1	2.53355	0.0112914	1.52215	2.98012	-0.106495
100124961_TGI_at	FBXL11	-2.53345	0.0112947	-0.635427	-1.7655	-2.36499
100305268_TGI_at	CREBL2	2.53335	0.0112979	2.56236	1.07806	0.388195
100313219_TGI_at	DFFA	2.53305	0.0113075	2.6797	0.873797	0.432939
100156502_TGI_at	C18orf15	-2.53226	0.011333	-2.76651	-0.298422	-0.897801
100145992_TGI_at	FGA	2.53083	0.0113793	1.04825	0.913439	2.65543
100159243_TGI_at	CHST2	-2.53078	0.0113808	-1.72631	-0.866421	-1.76096
100151317_TGI_at	-	-2.53	0.0114064	-1.09691	-2.27345	-1.19846
100154451_TGI_at	RILPL1	-2.52999	0.0114064	-1.71332	-2.45631	-0.155207
100156964_TGI_at	SDCCAG10	-2.52943	0.0114247	-2.60085	-1.44099	0.0434187
100307118_TGI_at	NUTF2	2.52845	0.0114568	1.61996	0.780357	1.99192
100309935_TGI_at	SNAPC3	-2.52678	0.0115112	-0.867856	-2.96275	-0.807077
100306771_TGI_at	ELF2	2.52673	0.0115131	2.10013	0.144248	1.97021
100163090_TGI_at	PKHD1	-2.52646	0.0115218	-2.90135	-0.474878	-0.518791
100308904_TGI_at	PAK2	2.52645	0.011522	2.33802	0.91428	0.853346
100308762_TGI_at	-	-2.52645	0.0115222	-2.26272	-1.76507	-0.0898881
100158794_TGI_at	C1orf102	2.52586	0.0115415	1.22672	0.844789	2.46754
100313238_TGI_at	ARHGEF19	-2.5257	0.0115468	-2.81575	-0.810439	-0.293859
100150391_TGI_at	KHDRBS2	2.52557	0.0115512	3.03064	0.495276	0.316517
100145580_TGI_at	ZNF366	-2.52469	0.01158	-2.38892	-0.764198	-0.932229
100123980_TGI_at	-	-2.52464	0.0115817	-1.93426	-0.61777	-1.71342
100144676_TGI_at	-	-2.52439	0.0115899	-1.28566	-2.10344	-1.09844
100137783_TGI_at	-	-2.52432	0.0115923	-2.27863	-0.331041	-1.52674
100134606_TGI_at	EME2	-2.52409	0.0115999	-0.666403	-1.96412	-2.10063
100303809_TGI_at	HSPA9	-2.52362	0.0116154	-2.00213	-1.31925	-0.901313
100147087_TGI_at	-	-2.52354	0.0116179	-2.94547	1.00938	-1.9661
100138113_TGI_at	-	2.52289	0.0116394	1.91292	1.94863	0.381651
100309898_TGI_at	WDR52	2.52235	0.0116572	0.558596	2.74395	1.45131
100158215_TGI_at	PPP1R14A	2.52228	0.0116597	2.34047	1.1745	0.576104
100307206_TGI_at	-	2.5217	0.0116791	2.12454	-0.25087	2.3294
100160184_TGI_at	HGF	2.52146	0.011687	1.97744	0.598748	1.66646
100310734_TGI_at	AGBL5	2.52098	0.0117027	1.49278	0.625218	2.3121
100136492_TGI_at	-	2.52055	0.0117172	2.35147	-0.0129904	1.76901
100141397_TGI_at	NOS1AP	-2.52049	0.011719	-1.44076	-2.07406	-0.905099
100312793_TGI_at	KIFAP3	2.52032	0.0117247	1.99865	-0.0267365	2.27294
100143265_TGI_at	DUSP16	2.52004	0.0117341	1.93712	0.966583	1.34437
100148896_TGI_at	DMD	2.51956	0.0117501	1.5737	0.858489	1.95878
100154123_TGI_at	C3orf35	-2.51949	0.0117524	-1.21724	-0.734332	-2.58073
100139719_TGI_at	-	-2.51895	0.0117707	-1.79667	-0.996038	-1.50732
100151186_TGI_at	KIF2C	-2.51758	0.0118165	-1.4273	-1.16048	-1.85015
100159939_TGI_at	C20orf160	2.51725	0.0118274	1.13578	1.00272	2.41564
100149120_TGI_at	MARK2	-2.51675	0.0118444	-1.8392	-1.38991	-1.04194
100302896_TGI_at	MAPK10	2.51671	0.0118457	1.20746	1.09038	2.22548
100304155_TGI_at	GNA14	2.51654	0.0118514	3.33274	-1.5483	1.9638
100141695_TGI_at	-	2.51593	0.0118718	1.87382	0.502269	1.89791
100301853_TGI_at	PHF12	-2.5154	0.0118897	-1.50125	-0.360774	-2.55901
100302476_TGI_at	SERPINB3	2.51481	0.0119097	2.60083	0.959508	0.41874
100310369_TGI_at	TAZ	-2.51447	0.011921	-1.72581	-0.914667	-1.67992
100300346_TGI_at	NOTCH2	-2.51425	0.0119287	-1.39282	-1.58236	-1.46097
100309253_TGI_at	SNX14	2.51421	0.0119298	1.78972	1.69352	0.79588
100156520_TGI_at	ANKRD34B	-2.51412	0.011933	-2.35326	-1.52913	-0.180228
merck-VZV_OKA_ORF40_s_at	-	2.51382	0.011943	1.68222	-0.199131	2.87566
100130858_TGI_at	-	-2.51326	0.0119621	-0.954772	-1.59981	-2.04999
100136252_TGI_at	MYOM3	-2.51326	0.0119622	-2.21978	-0.90181	-1.0041
100136826_TGI_at	FAM176A	2.51307	0.0119687	2.18603	-0.621626	2.60504
100161914_TGI_at	OR10X1	-2.51269	0.0119813	-2.26289	-2.0642	0.242983
100163030_TGI_at	RAB7B	2.5125	0.0119878	2.17601	0.843006	1.12342
100151182_TGI_at	AGL	-2.51247	0.0119891	-2.7698	-0.376472	-0.774126
100121719_TGI_at	GPR126	2.51227	0.0119956	2.14093	0.427721	1.59546
100309124_TGI_at	PGK1	-2.51214	0.012	-3.09763	0.385065	-1.09491
100311887_TGI_at	-	-2.51109	0.0120361	-2.14049	-1.01619	-0.993251
100309332_TGI_at	PARD6B	2.51055	0.0120544	2.36916	0.328879	1.37568
100309137_TGI_at	OTUD5	-2.51052	0.0120554	-1.61267	-0.832805	-1.9128
100133877_TGI_at	CEPT1	2.51036	0.0120607	2.72343	0.328623	0.883208
100154914_TGI_at	CHSY3	-2.50978	0.0120807	-2.17232	-1.28443	-0.672718
100127929_TGI_at	HIST1H2BB	-2.5096	0.0120869	-1.74406	-2.47882	-0.0488619
100156618_TGI_at	CCDC88B	-2.50948	0.0120911	-1.92069	-0.863913	-1.4509
100152289_TGI_at	HMBS	-2.50946	0.0120917	-2.61904	1.13713	-2.52206
100133557_TGI_at	-	-2.50938	0.0120943	-1.66543	-0.844692	-1.82508
100160681_TGI_at	-	-2.50928	0.0120979	-2.0063	-0.573162	-1.62819
100160571_TGI_at	-	2.50919	0.0121009	1.35793	1.68173	1.398
100130570_TGI_at	PBRM1	2.50856	0.0121226	2.43424	0.71023	0.892155
100122217_TGI_at	TRABD	-2.50849	0.0121247	-1.657	-0.246853	-2.44503
100145816_TGI_at	PCGF5	2.50848	0.0121251	1.79516	1.80602	0.66211
100312992_TGI_at	PLXDC2	2.50721	0.0121689	1.06456	-0.237952	3.76049
100129645_TGI_at	LTBP2	2.506	0.0122105	2.91383	-0.0748961	1.02163
100306716_TGI_at	CDC2L5	-2.50528	0.0122354	-3.41937	-0.0749046	-0.164751
100300678_TGI_at	-	2.50319	0.0123079	1.1589	0.694909	2.66954
100130346_TGI_at	ADCY7	-2.50316	0.012309	-3.70922	0.7072	-0.555705
100140705_TGI_at	DMTF1	2.50273	0.012324	0.750934	2.98045	0.903576
100141764_TGI_at	NLRC5	-2.50257	0.0123295	-1.3769	-0.925805	-2.12973
100123337_TGI_at	TESC	-2.50256	0.0123298	-0.340874	-2.38177	-2.08399
100155141_TGI_at	-	-2.50249	0.0123323	-1.69643	-0.281375	-2.34304
100311574_TGI_at	C8orf42	2.50239	0.0123359	1.56036	1.6386	1.14711
100308210_TGI_at	SLC30A8	2.50183	0.0123555	2.40219	0.627066	1.00813
100139740_TGI_at	ZC3HAV1L	2.50168	0.0123604	3.15362	0.268176	0.32972
100122237_TGI_at	FGA	2.50116	0.0123786	1.49922	-0.106838	3.01058
merck2-HCV_revcomp_at	-	2.50112	0.0123803	2.13692	0.288766	1.72057
100311889_TGI_at	F11R	2.50093	0.0123867	1.62375	1.12453	1.58064
100130319_TGI_at	-	-2.50006	0.0124171	-4.20918	0.378843	0.480335
100301886_TGI_at	LPAR5	-2.49934	0.0124426	-0.740965	-1.74277	-2.17352
100306897_TGI_at	HIST1H2AC	-2.49881	0.0124612	-2.99099	0.304878	-1.13472
100303410_TGI_at	C20orf107	-2.49822	0.0124817	-1.76558	-0.0448213	-2.47979
100308887_TGI_at	ANKRD13B	-2.49822	0.0124819	-1.52614	-2.3157	-0.495492
100156680_TGI_at	EFHD1	2.49782	0.0124958	2.2284	0.884595	0.978922
100149337_TGI_at	EPB41L5	2.49782	0.012496	2.31407	0.827746	0.91785
100132792_TGI_at	TCF7L2	-2.49776	0.0124981	-2.0776	-1.54905	-0.5104
100154749_TGI_at	ZMYM6	2.49758	0.0125045	1.1305	0.0319395	3.37428
100122048_TGI_at	-	-2.49749	0.0125075	-0.207481	-2.54078	-2.09704
100125891_TGI_at	RAB3IP	2.49695	0.0125266	2.892	0.62197	0.322892
100144425_TGI_at	CHL1	2.49653	0.0125415	1.20082	0.471438	2.82602
100153416_TGI_at	ANP32B	2.49641	0.0125459	1.09898	1.80347	1.60819
100157406_TGI_at	-	-2.49543	0.0125803	-1.91472	-0.558775	-1.74255
100128705_TGI_at	PCSK1N	-2.49528	0.0125857	-2.61407	-0.0728205	-1.26615
100305264_TGI_at	-	2.49485	0.0126012	1.52519	0.601671	2.23897
100123194_TGI_at	DUSP18	2.49476	0.0126041	1.67386	1.58647	1.02737
100301339_TGI_at	PCSK6	-2.49462	0.0126093	-2.53696	-0.842084	-0.58708
100140872_TGI_at	SH3GL2	2.49434	0.0126191	2.38404	0.10748	1.54859
100122848_TGI_at	NFYC	-2.49379	0.0126389	-2.89425	0.114532	-1.06494
100131817_TGI_at	-	2.49367	0.0126431	1.86045	0.806564	1.56163
100128797_TGI_at	TLR4	2.49353	0.012648	1.63123	1.3596	1.31564
100151937_TGI_at	ALDH1L2	-2.49349	0.0126495	-2.29688	-1.11409	-0.640942
100141682_TGI_at	ADAMTSL5	-2.49348	0.0126498	-1.94044	-0.963936	-1.28951
100309422_TGI_at	STX12	2.49338	0.0126533	1.64515	1.16653	1.49299
100130045_TGI_at	-	2.4924	0.0126883	1.75337	1.42334	1.0786
100149620_TGI_at	MMP3	-2.49218	0.0126963	-2.46423	-1.05585	-0.465169
100122958_TGI_at	TNFRSF4	2.49216	0.012697	2.4607	0.411828	1.12716
100133756_TGI_at	-	-2.4916	0.0127168	-1.52395	-2.02162	-0.785399
100308022_TGI_at	CST3	-2.49118	0.0127321	-1.4064	-0.890162	-2.10239
100144212_TGI_at	BAZ1A	2.49038	0.0127608	2.8784	-0.768249	1.74718
100312908_TGI_at	NOVA2	-2.49022	0.0127663	-1.70591	-2.47245	-0.0697688
100123386_TGI_at	-	-2.48978	0.0127822	-1.38564	-1.87641	-1.12216
100148304_TGI_at	ZMAT4	-2.48938	0.0127965	-1.12803	-3.0769	-0.254476
100309301_TGI_at	-	2.48929	0.0128	1.40895	0.093138	2.90833
100125690_TGI_at	-	-2.48922	0.0128023	-2.19	-1.26528	-0.626709
100141669_TGI_at	WIF1	2.48909	0.012807	0.643463	1.77442	2.25631
100124737_TGI_at	VAMP2	-2.48825	0.0128375	-2.76491	-0.134499	-0.979553
100302860_TGI_at	SLC1A4	-2.48823	0.012838	-2.79191	-0.0938502	-0.983478
100151805_TGI_at	MATN4	-2.48769	0.0128574	-1.58155	-1.35025	-1.38259
100123790_TGI_at	RFX3	2.48768	0.012858	1.79533	1.78764	0.639166
100158436_TGI_at	-	-2.4875	0.0128645	-2.35555	-0.0606092	-1.62237
100306927_TGI_at	PSMD14	-2.48735	0.0128699	-1.93578	0.140138	-2.4103
100161512_TGI_at	UBTF	2.48707	0.0128799	0.862532	0.706904	3.03706
100157383_TGI_at	ZNF434	2.48673	0.0128923	2.66138	1.53386	-0.307415
100157661_TGI_at	PELO	-2.48577	0.0129272	-2.08846	-1.75224	-0.264093
100309471_TGI_at	NPL	2.48526	0.0129456	2.90574	0.224254	0.6863
100142130_TGI_at	-	2.485	0.0129551	2.32921	0.80332	0.896194
100132264_TGI_at	-	-2.4843	0.0129807	-1.39534	-1.45707	-1.52561
100124455_TGI_at	GNGT2	2.48411	0.0129877	2.32014	0.458798	1.25855
100133496_TGI_at	-	2.48298	0.0130288	2.11006	1.1269	0.86656
100129462_TGI_at	FBXW11	2.48276	0.0130369	1.81203	-0.221344	2.65599
100305687_TGI_at	ZNF148	-2.48252	0.0130456	-2.95531	0.0901011	-0.932688
merck-VZV_OKA_ORF43_s_at	-	2.4824	0.0130502	0.483547	2.22398	2.00651
100123813_TGI_at	NPEPL1	-2.48239	0.0130503	-0.872603	-1.81945	-1.87856
100142267_TGI_at	CTSC	2.48226	0.0130551	1.52604	0.394979	2.42362
100156092_TGI_at	-	-2.48216	0.0130588	-1.48569	-2.01959	-0.82183
100126458_TGI_at	SOX8	-2.48126	0.0130918	-1.14059	-0.885944	-2.45636
100130240_TGI_at	-	-2.48079	0.0131092	-1.45165	-1.2492	-1.65246
100160491_TGI_at	PLXDC2	2.47958	0.0131537	1.24982	-0.256463	3.46684
100130091_TGI_at	LGR5	-2.47952	0.0131558	-0.810892	-2.38423	-1.38233
100139824_TGI_at	MAP2K4	2.47937	0.0131616	1.62322	1.04415	1.6204
100301419_TGI_at	SCAMP1	-2.47912	0.0131707	-2.00113	-1.63443	-0.49241
100307476_TGI_at	IL6ST	2.4791	0.0131716	1.11115	1.97049	1.38635
100141179_TGI_at	-	2.47736	0.0132358	1.61986	1.18483	1.47753
100137404_TGI_at	ARHGAP24	2.47718	0.0132424	2.51656	0.777247	0.646829
100151938_TGI_at	TXNRD1	2.47694	0.0132513	1.97962	-0.163303	2.35226
100303120_TGI_at	AKT1S1	-2.47584	0.0132922	-2.27494	-0.261047	-1.50665
100153499_TGI_at	BCAP29	2.47564	0.0132996	1.80123	0.553647	1.86607
100141530_TGI_at	-	2.47541	0.0133085	3.1104	0.668274	-0.0708374
100307258_TGI_at	ETV1	2.47515	0.013318	1.96016	0.96689	1.22256
100147937_TGI_at	-	-2.47504	0.0133222	-2.44291	-1.63343	0.128679
100144343_TGI_at	POP1	2.47471	0.0133345	2.1312	1.64134	0.295801
100149850_TGI_at	AK7	2.47467	0.0133359	2.32683	0.298938	1.39355
100127738_TGI_at	-	2.47418	0.0133544	3.14819	1.26987	-0.739635
100160587_TGI_at	-	-2.47416	0.0133549	-2.89943	-0.140336	-0.75857
100148017_TGI_at	ANGPTL3	-2.4739	0.0133646	-1.98323	-1.25097	-0.898149
100133648_TGI_at	TDP1	2.47346	0.0133812	2.14604	0.874692	1.05493
100302565_TGI_at	MT2A	2.47264	0.0134118	2.7612	-0.462249	1.56249
100301538_TGI_at	FGFR1	-2.47243	0.0134198	-2.68174	-1.69444	0.528065
100161021_TGI_at	CSMD2	-2.47238	0.0134216	-1.77155	-1.91136	-0.515489
100155653_TGI_at	RRAD	2.47223	0.0134271	2.4073	0.489517	1.08239
100147323_TGI_at	-	2.4721	0.0134322	1.88825	0.272833	2.0246
100308161_TGI_at	-	2.47201	0.0134354	1.91711	1.02328	1.2186
100140779_TGI_at	C17orf28	-2.47122	0.0134654	-1.99402	-2.12278	0.0117343
100313315_TGI_at	ATPAF2	-2.47093	0.0134763	-2.80721	-0.693434	-0.315934
100152673_TGI_at	-	-2.47081	0.0134806	-2.14022	-1.11465	-0.812912
100133244_TGI_at	RAB35	-2.47076	0.0134828	-0.587826	-3.64319	-0.390314
100157101_TGI_at	-	2.4705	0.0134924	2.94891	-0.930493	1.77512
100137637_TGI_at	-	-2.47019	0.0135042	-1.52796	-1.30984	-1.46341
100138805_TGI_at	-	-2.47018	0.0135043	-1.35498	-2.07142	-0.926722
100155951_TGI_at	MAST4	2.47011	0.0135071	1.67994	1.60802	0.947792
100130846_TGI_at	-	2.4701	0.0135076	2.55881	-0.225424	1.59705
100156075_TGI_at	ARL4A	-2.46995	0.013513	-1.59208	-2.0677	-0.600544
100142018_TGI_at	S1PR1	2.46976	0.0135204	2.46708	-0.221629	1.72
100161196_TGI_at	TMEM86A	2.46938	0.0135348	2.28981	0.725428	0.999291
100309370_TGI_at	MYO1B	2.46937	0.013535	2.16058	-0.362989	2.28942
100130273_TGI_at	-	2.46916	0.013543	2.33675	-0.225698	1.90409
100304390_TGI_at	SH3D19	2.46889	0.0135534	4.21816	-1.42727	0.514791
100128367_TGI_at	-	2.46887	0.013554	1.38369	1.48038	1.48727
100142573_TGI_at	OTUD3	2.46873	0.0135594	2.49038	2.04123	-0.623334
100308930_TGI_at	-	2.46853	0.0135671	0.857982	2.21908	1.46349
100143048_TGI_at	-	-2.46848	0.013569	-3.31006	1.01096	-1.35126
100151475_TGI_at	ISOC2	-2.46764	0.0136007	-1.42907	-0.859255	-2.05551
100154297_TGI_at	-	2.46722	0.0136168	1.22538	0.708264	2.49182
100146834_TGI_at	WDR19	2.46706	0.0136227	1.52824	2.22363	0.524404
100125003_TGI_at	EAF1	-2.46664	0.0136388	-2.1367	-1.12114	-0.802847
100301031_TGI_at	CXorf59	2.46621	0.0136551	2.12312	-0.667232	2.64563
100160791_TGI_at	-	-2.4661	0.0136592	-2.2978	1.01241	-2.75483
100144107_TGI_at	RFPL3	2.46608	0.0136601	1.71827	1.04694	1.45897
100309294_TGI_at	XRRA1	2.4658	0.0136708	1.33333	1.83362	1.19072
100155823_TGI_at	PAX4	-2.46567	0.0136757	-2.67172	-1.64242	0.474521
100137795_TGI_at	-	-2.46555	0.0136804	-1.76997	-0.0315137	-2.42215
100153912_TGI_at	-	-2.46522	0.0136929	-0.91594	-2.05211	-1.54671
100155485_TGI_at	PRPF38A	2.46494	0.0137037	2.86864	1.04584	-0.140953
100132509_TGI_at	LBH	2.46474	0.0137111	1.55392	1.14089	1.58887
100313896_TGI_at	GRSF1	-2.4639	0.0137436	-1.8725	-0.855332	-1.43578
100303566_TGI_at	OXTR	2.46354	0.0137574	2.27686	-0.0513419	1.79821
100305427_TGI_at	SLC2A11	-2.46352	0.013758	-0.938429	-1.84609	-1.72228
100304829_TGI_at	-	2.46307	0.0137752	3.67934	0.392091	-0.604315
100311458_TGI_at	SFRS4	2.46266	0.013791	1.94827	1.39025	0.782215
100300610_TGI_at	TLN2	-2.46238	0.0138017	-2.15337	-0.508688	-1.39612
100150255_TGI_at	ARRB1	2.46235	0.0138029	1.21301	1.93097	1.25174
100150694_TGI_at	LMO7	2.46224	0.0138072	3.07702	0.29517	0.330008
100139129_TGI_at	-	-2.46095	0.0138568	-4.00636	1.77217	-1.14527
100136438_TGI_at	GPR110	2.46026	0.0138836	2.46317	-0.924566	2.42373
100162156_TGI_at	GREM2	-2.45997	0.0138951	-0.961786	-2.32971	-1.18928
100306107_TGI_at	HIST1H2BO	-2.45988	0.0138984	-1.95552	-1.0129	-1.15162
100152897_TGI_at	-	2.45973	0.0139043	1.26942	2.60571	0.47963
100142444_TGI_at	CSF2RB	-2.45951	0.0139126	-2.08916	-0.630577	-1.35526
100146463_TGI_at	-	-2.45939	0.0139175	-1.53089	-1.44062	-1.30436
100158020_TGI_at	ITGA8	2.4592	0.0139248	2.05005	1.33244	0.692858
100305620_TGI_at	-	2.45865	0.013946	1.01429	1.18915	2.27744
100155684_TGI_at	HSD11B1	2.45865	0.0139461	1.8751	-0.0433697	2.33869
100123021_TGI_at	UBE2J1	-2.45824	0.0139621	-2.80294	-0.198931	-0.801145
100138735_TGI_at	IFI16	2.45812	0.0139666	1.85644	0.243735	2.07063
100310374_TGI_at	SEC14L2	-2.45755	0.0139889	-1.88708	-0.257156	-2.01321
100133413_TGI_at	SCARA5	-2.45732	0.013998	-2.60801	-1.29786	0.05107
100124025_TGI_at	SNPH	-2.45707	0.0140074	0.0295622	-2.64119	-2.24346
100141367_TGI_at	SLC7A2	2.45692	0.0140136	1.62587	1.78851	0.812472
100136957_TGI_at	DNASE1	-2.45678	0.0140188	-2.76315	-0.769721	-0.271144
100159609_TGI_at	C2orf71	2.45673	0.0140207	2.42442	-0.22039	1.75205
100304439_TGI_at	PA2G4	2.45585	0.0140553	1.08958	1.98587	1.35429
100155978_TGI_at	ST6GAL2	2.45581	0.0140569	2.03162	1.69904	0.337641
100162874_TGI_at	PTPLAD2	2.45563	0.0140637	1.80189	1.22462	1.14065
100139004_TGI_at	RHBDF1	2.4551	0.0140847	2.3714	0.5225	1.06448
100140965_TGI_at	-	-2.45476	0.0140979	-2.09846	-0.969293	-0.987251
100145052_TGI_at	HLA-DPB1	2.45424	0.0141184	1.43473	1.58522	1.28019
100125715_TGI_at	SPINK1	-2.45403	0.0141266	-0.830197	-2.52956	-1.15641
100312384_TGI_at	-	-2.45396	0.0141294	-2.38478	-1.07515	-0.479726
100124269_TGI_at	UST	2.45389	0.0141322	1.86047	0.964908	1.32075
100313288_TGI_at	SLC2A1	-2.45386	0.0141331	0.150145	-2.84656	-2.1951
100303158_TGI_at	C11orf57	2.45372	0.0141388	2.66077	0.952172	0.221162
100310296_TGI_at	GLTSCR2	2.45356	0.014145	2.75859	-1.2024	2.2833
100154205_TGI_at	-	2.45341	0.014151	1.9487	1.31704	0.837871
100306204_TGI_at	NUDCD2	2.45339	0.0141515	2.15265	0.900464	0.979452
100141827_TGI_at	SYT13	-2.45333	0.0141541	-1.40583	-1.51072	-1.39457
100122228_TGI_at	-	-2.45332	0.0141546	-0.529175	-3.38541	-0.700089
merck2-VZV_OKA_O33_up_at	-	-2.45238	0.0141916	-2.82476	-0.790038	-0.156002
100147321_TGI_at	EXOC3L2	-2.45236	0.0141921	-0.679587	-2.13868	-1.76124
100155439_TGI_at	-	2.45213	0.0142013	1.80999	1.39917	0.944305
100303669_TGI_at	ADRB2	2.45203	0.0142053	1.49746	0.365757	2.43288
100124907_TGI_at	ZNF485	2.45156	0.014224	1.40864	0.982009	1.9266
100307047_TGI_at	GPM6B	2.45151	0.0142258	1.31837	1.04256	1.99018
100156532_TGI_at	-	-2.45127	0.0142352	-2.8657	0.45184	-1.36405
100146301_TGI_at	POLM	-2.45115	0.0142402	-0.410923	-1.84736	-2.42944
100313670_TGI_at	ARHGAP5	2.45112	0.0142413	2.07229	0.565679	1.42819
100312666_TGI_at	TSC22D3	-2.45102	0.0142454	-1.73895	-2.04986	-0.376893
100302802_TGI_at	SLC25A12	-2.45074	0.0142562	-1.90671	-0.836484	-1.38125
100128021_TGI_at	AGRN	-2.45042	0.0142691	-0.615523	-2.67596	-1.29819
100134142_TGI_at	EVI1	2.45027	0.014275	2.54949	0.33084	1.00291
100144705_TGI_at	TRAPPC10	-2.44982	0.0142928	-2.69105	0.810208	-1.96954
100150689_TGI_at	-	-2.44979	0.0142941	-2.7702	-0.61817	-0.402028
100146963_TGI_at	CTNNB1	-2.44934	0.0143116	-3.229	0.954439	-1.36811
100146735_TGI_at	HDAC9	-2.44916	0.0143189	-0.57823	-2.22682	-1.80578
100125096_TGI_at	GLYATL1	-2.449	0.0143253	-0.365501	-1.55362	-2.78801
100144329_TGI_at	-	2.44857	0.0143426	1.60612	-0.0915657	2.7416
100302038_TGI_at	-	-2.44809	0.0143614	-2.56326	-0.0948859	-1.22019
100145759_TGI_at	-	2.44767	0.0143784	1.73136	-0.188148	2.66429
100313160_TGI_at	VTA1	-2.44682	0.0144122	-2.9373	-0.705509	-0.0747787
100144969_TGI_at	TCF7L2	-2.44668	0.014418	-2.03825	-0.900538	-1.12498
100163111_TGI_at	C10orf104	2.44612	0.0144403	1.06988	0.98307	2.38549
100150184_TGI_at	CTTNBP2NL	2.44601	0.0144447	1.89938	2.32223	-0.133952
100134059_TGI_at	-	2.44495	0.0144873	1.99422	1.37501	0.698594
100133410_TGI_at	PLXNC1	2.44482	0.0144925	2.22538	1.0301	0.729001
100150005_TGI_at	FBXO15	2.44444	0.0145077	1.84274	1.16098	1.1265
100130811_TGI_at	-	2.44433	0.0145123	1.57926	0.375432	2.29398
100131027_TGI_at	-	2.4438	0.0145336	1.88965	1.14116	1.08025
100153814_TGI_at	RIMKLB	2.44342	0.0145487	1.75724	0.959651	1.44872
100123759_TGI_at	GARS	-2.44332	0.0145528	-1.51867	-1.99704	-0.721582
100144611_TGI_at	-	2.44303	0.0145646	1.44304	0.446364	2.40833
100303689_TGI_at	MAML1	-2.44293	0.0145685	-1.68767	-1.48857	-1.00475
100304465_TGI_at	GARS	-2.44285	0.0145719	-1.80568	-0.97709	-1.36246
100312365_TGI_at	-	2.44259	0.0145822	1.50343	2.08029	0.656375
100133336_TGI_at	ADAM9	2.4422	0.0145982	1.61328	1.30909	1.2898
100302920_TGI_at	MSR1	2.44212	0.0146014	2.54109	0.346796	0.982061
100305703_TGI_at	FGD4	2.44205	0.0146043	0.746822	1.34647	2.45556
100132760_TGI_at	-	2.44186	0.0146117	1.59822	0.784233	1.8456
100162614_TGI_at	RNASE1	2.44184	0.0146128	2.88447	-0.274376	1.13808
100301619_TGI_at	CLPB	-2.4418	0.0146143	-1.50557	-1.75898	-0.979672
100161743_TGI_at	KBTBD2	2.44178	0.0146152	2.19646	0.163623	1.64723
100145294_TGI_at	-	2.44167	0.0146194	1.23605	1.93642	1.17294
100306622_TGI_at	CTNNB1	2.44158	0.0146232	1.04415	1.0865	2.30666
100146914_TGI_at	-	-2.44116	0.0146402	-1.17271	-2.27132	-0.918229
100305905_TGI_at	C1orf21	-2.44082	0.0146541	-3.12771	-0.726639	0.223383
100306877_TGI_at	PROCR	-2.44031	0.0146746	-0.998136	-1.21427	-2.23772
100159189_TGI_at	CBFA2T2	-2.43994	0.0146895	-2.15153	-0.749726	-1.10801
100136618_TGI_at	-	-2.43896	0.0147297	-2.1495	-1.59057	-0.250917
100303874_TGI_at	FREM3	-2.43892	0.0147312	-1.77901	-1.46347	-0.895424
100161827_TGI_at	CAPN3	2.43782	0.0147762	1.0597	1.28512	2.0749
100126013_TGI_at	WDR52	2.43769	0.0147813	0.59685	2.39842	1.58197
100154864_TGI_at	MUTED	2.43765	0.0147829	1.34372	2.02575	0.92415
100123878_TGI_at	INPP5D	-2.43679	0.0148182	-3.33309	1.18671	-1.43543
100149788_TGI_at	-	-2.43627	0.0148395	-0.879026	-1.19605	-2.41379
100139855_TGI_at	GPR110	2.43546	0.0148731	2.37559	-0.300174	1.85892
100159887_TGI_at	RASSF2	-2.43544	0.0148737	-2.44344	0.0753665	-1.53521
100309178_TGI_at	ABHD2	2.43381	0.0149408	1.18984	2.03062	1.12537
100151220_TGI_at	WRB	2.43356	0.0149514	1.92519	1.11077	1.04145
100122730_TGI_at	DONSON	2.43271	0.0149863	2.34088	1.93497	-0.378931
100158442_TGI_at	C12orf24	-2.43259	0.0149913	-1.79319	-0.281597	-2.06901
100152214_TGI_at	DSC2	-2.43252	0.0149944	-0.846392	-0.930728	-2.72238
100161770_TGI_at	ADAMTS8	2.4325	0.014995	1.2336	1.31632	1.79077
100128798_TGI_at	PLA2G2F	-2.43247	0.0149961	-1.8824	-0.829605	-1.38565
100138127_TGI_at	DICER1	2.43207	0.015013	1.05338	1.59074	1.76037
100303069_TGI_at	ZNF836	2.43133	0.0150435	1.08078	1.85779	1.44834
100309328_TGI_at	ATG4A	2.43126	0.0150462	2.27148	0.183412	1.50183
100149164_TGI_at	MAOB	2.43125	0.0150467	1.04174	1.30067	2.0709
100313253_TGI_at	EME2	-2.43121	0.0150483	-0.508508	-1.11859	-2.99769
merck2-CMV_UL102_at	-	2.43088	0.0150621	1.78164	0.252645	2.1112
100301178_TGI_at	HGSNAT	2.43079	0.0150657	2.40706	0.52209	0.9669
100137288_TGI_at	ZMIZ1	-2.43037	0.0150833	-1.31398	-1.50359	-1.48374
100129431_TGI_at	PRDM6	2.43032	0.0150854	0.747826	1.31342	2.46452
100152769_TGI_at	C17orf76	-2.42872	0.0151524	-1.65349	-1.47858	-1.03411
100136134_TGI_at	C7orf27	-2.42853	0.0151602	-1.05845	-2.22847	-1.09557
100139356_TGI_at	FUT3	-2.42795	0.0151845	-2.02724	-1.52149	-0.469368
100146777_TGI_at	-	2.42791	0.0151861	1.6622	1.66396	0.831252
merck2-CMV_UL114_at	-	-2.42765	0.0151969	-1.78041	-0.987945	-1.35622
100154476_TGI_at	SLC48A1	-2.42765	0.0151971	-1.89939	-1.34878	-0.822679
100128253_TGI_at	GPX4	2.42694	0.0152269	2.91132	0.584652	0.194565
100146359_TGI_at	-	-2.42626	0.0152555	-2.90859	-1.35383	0.587829
100154824_TGI_at	-	-2.4262	0.0152579	-1.29073	-0.6155	-2.4139
100137560_TGI_at	NKX2-1	2.42608	0.0152631	2.57905	0.0589098	1.19107
100129408_TGI_at	ERCC5	-2.42532	0.0152947	-1.36356	-1.12778	-1.78823
merck2-VZV_OKA_O15_up_at	-	2.42531	0.0152955	2.02726	0.887932	1.11052
100300702_TGI_at	PWP1	-2.42516	0.0153018	-1.35469	-0.47361	-2.4677
100130525_TGI_at	C15orf57	2.42467	0.0153223	2.43058	1.01855	0.415455
100309318_TGI_at	HEATR5A	-2.42458	0.0153262	-2.00165	-0.986872	-1.04371
100160866_TGI_at	GRIK4	2.42428	0.0153389	2.32988	0.485129	1.0989
100311543_TGI_at	CAPRIN1	-2.42394	0.015353	-1.28633	-2.08407	-0.917066
100146187_TGI_at	C7orf58	2.42392	0.0153542	1.90194	1.21604	0.947129
100138003_TGI_at	GLT25D1	2.42352	0.015371	0.824713	1.24779	2.41106
100139225_TGI_at	-	2.42345	0.0153738	2.63308	0.139092	1.02894
100306175_TGI_at	SNORA71B	-2.42283	0.0154002	-1.51292	-0.728649	-1.98292
100140730_TGI_at	RASEF	-2.42196	0.015437	-1.06095	-1.66833	-1.65055
merck2-CMV_UL35_at	-	2.42171	0.0154478	3.11936	1.43622	-0.973885
100306068_TGI_at	CDC2L6	2.4211	0.0154737	1.69044	1.38372	1.06437
100132546_TGI_at	DSCC1	-2.42102	0.0154769	-2.0485	0.113042	-2.0938
100131224_TGI_at	SEPN1	-2.42098	0.0154788	-0.817073	-2.75211	-0.881696
100300841_TGI_at	NKPD1	-2.42045	0.0155013	-2.2227	-0.280298	-1.44921
100141736_TGI_at	H2AFZ	2.42032	0.0155069	1.84676	1.75445	0.467294
100310000_TGI_at	RHPN1	-2.42022	0.0155113	-2.08039	-0.492007	-1.43052
100159227_TGI_at	GAL3ST4	-2.4201	0.0155164	-2.03013	-1.26736	-0.709008
100310904_TGI_at	BRD9	2.42005	0.0155184	2.24917	0.331185	1.3597
100139701_TGI_at	ADD2	-2.41944	0.0155446	-2.2491	-0.616532	-1.06743
100304519_TGI_at	AKR1B1	2.41943	0.0155449	2.3832	0.685899	0.810262
100131994_TGI_at	-	-2.41897	0.0155647	-2.29028	-1.29977	-0.312133
100123253_TGI_at	-	-2.41793	0.015609	-1.29502	-1.98338	-0.995751
100139304_TGI_at	ULK2	2.41792	0.0156095	1.9585	1.06222	1.01353
100125795_TGI_at	ANKRD12	-2.41711	0.0156445	-2.1151	-1.71004	-0.133262
100134101_TGI_at	SLC17A4	-2.41684	0.0156558	-0.311954	-2.59978	-1.73089
100141935_TGI_at	PLA2G12A	-2.41683	0.0156564	-1.38272	-2.01502	-0.83938
100140680_TGI_at	VAMP8	2.41677	0.0156587	0.425077	3.34635	0.811783
100146967_TGI_at	SCIN	2.41665	0.0156639	1.42148	3.20305	-0.427039
100143823_TGI_at	TMED9	-2.41643	0.0156734	-2.79674	-0.586969	-0.330506
100151438_TGI_at	C11orf9	2.41635	0.0156771	2.98481	-0.599051	1.27911
100306510_TGI_at	SCN3A	2.41578	0.0157013	1.69027	0.837297	1.61156
100142657_TGI_at	DDX19A	2.41505	0.015733	1.60087	0.227061	2.35699
100154940_TGI_at	IGSF3	2.41503	0.015734	2.55945	0.0759208	1.17894
100127774_TGI_at	KIAA0100	-2.41486	0.0157414	-1.80859	-0.216691	-2.07849
100160861_TGI_at	ABHD2	2.41448	0.0157577	0.544784	2.70785	1.29233
100300633_TGI_at	LOX	2.41444	0.0157594	0.896835	1.41193	2.12526
100122015_TGI_at	MOCS1	2.41434	0.0157635	2.63749	-0.574539	1.73281
100147819_TGI_at	REEP1	-2.41375	0.0157894	-1.05671	-0.852825	-2.47217
100309691_TGI_at	TCP11L1	2.41356	0.0157974	1.85	0.515277	1.71371
100147162_TGI_at	CDH8	-2.4134	0.0158043	-2.38664	-1.20093	-0.267969
100303676_TGI_at	CREBL2	2.41338	0.0158055	2.43684	0.663655	0.746351
100144396_TGI_at	ESRRA	-2.41337	0.0158056	-0.786522	-2.56056	-1.10445
100308624_TGI_at	DOPEY2	-2.41317	0.0158145	-1.43326	-0.387343	-2.42263
100153754_TGI_at	RCC2	-2.41314	0.0158158	-1.0364	-1.27026	-2.07324
100311674_TGI_at	HHIP	2.41285	0.0158283	1.1024	0.990176	2.26673
100145048_TGI_at	MUC15	2.41246	0.0158453	2.43179	1.08985	0.316679
100131843_TGI_at	ABLIM2	-2.41245	0.0158458	-1.96924	-0.357354	-1.70689
100157364_TGI_at	-	2.41224	0.0158549	1.39228	1.55342	1.28794
100301136_TGI_at	PRSS33	-2.41212	0.01586	-1.21662	-1.03261	-2.06323
100161201_TGI_at	KCNMA1	2.4119	0.0158695	2.45569	-0.548533	1.95406
100162186_TGI_at	PAXIP1	2.41126	0.0158977	0.490958	2.58149	1.48964
100311629_TGI_at	-	-2.41125	0.0158978	-2.03034	-0.974344	-0.990055
100311328_TGI_at	-	-2.41117	0.0159014	-1.93084	-1.23505	-0.862171
100301716_TGI_at	CCDC132	-2.41113	0.015903	-2.42298	-0.0355979	-1.40198
100302631_TGI_at	MPP2	-2.41103	0.0159076	-2.10531	-0.236954	-1.63781
100136582_TGI_at	MIPOL1	2.41078	0.0159185	-0.265087	2.12899	3.00114
100132881_TGI_at	-	2.41051	0.0159301	0.568549	2.24724	1.72137
100311036_TGI_at	GPR116	2.41047	0.0159322	2.64148	-0.94957	2.10218
100310962_TGI_at	-	2.41045	0.0159328	1.36925	1.98902	0.871912
100134885_TGI_at	C9orf68	2.41038	0.0159358	1.82395	0.192138	2.07329
100133290_TGI_at	SULT4A1	-2.41012	0.0159474	-2.43074	-1.7738	0.384394
100132743_TGI_at	-	-2.4093	0.015983	-2.60804	0.130696	-1.3108
merck-VZV_OKA_ORF63_s_at	-	-2.40884	0.0160035	-1.52274	-2.14447	-0.496764
100153441_TGI_at	-	-2.4086	0.0160139	-2.89924	0.377798	-1.15683
100154183_TGI_at	TMEM75	-2.40813	0.0160344	-1.80308	0.117603	-2.41384
100145425_TGI_at	KIAA1967	2.40771	0.0160527	1.83795	1.14792	1.07328
100152902_TGI_at	MFAP5	-2.40739	0.016067	-1.72206	-1.36784	-1.0093
100312272_TGI_at	FUT8	2.40688	0.0160894	1.68535	0.0439662	2.41012
100122428_TGI_at	-	-2.40568	0.0161424	-0.495287	-1.83934	-2.22976
100159708_TGI_at	NUDT16L1	-2.40548	0.0161511	-3.07096	-0.559563	0.0444678
100137089_TGI_at	-	2.4051	0.0161679	0.945444	1.03706	2.42158
100301659_TGI_at	GPR110	2.40507	0.0161693	2.03447	0.77131	1.17916
100139058_TGI_at	DOCK4	2.40476	0.0161831	2.16923	0.57529	1.19126
100309014_TGI_at	ZNF138	-2.40473	0.0161844	-1.44198	-0.213758	-2.57081
100159802_TGI_at	-	-2.40451	0.0161943	-1.95029	-0.661578	-1.407
100307347_TGI_at	PLCE1	2.40417	0.0162094	2.59059	1.62862	-0.470283
100312458_TGI_at	CCBE1	2.40412	0.0162113	1.58323	0.741505	1.83481
100158922_TGI_at	-	2.40389	0.0162218	1.42984	0.664523	2.12606
100309412_TGI_at	SCEL	2.40388	0.0162223	2.50025	0.602813	0.701375
100155602_TGI_at	SLAIN2	2.40382	0.0162247	1.84206	-0.0108988	2.2422
100313792_TGI_at	INSR	2.40249	0.016284	2.21436	0.923729	0.76848
100146548_TGI_at	RABL5	2.40235	0.01629	2.62666	0.369199	0.761019
100153341_TGI_at	PLCE1	2.40233	0.0162909	2.06531	-0.16026	2.08137
100134414_TGI_at	MIRN325	-2.40144	0.0163306	-0.760807	-0.915912	-2.79451
100134867_TGI_at	-	2.4014	0.0163324	1.16313	2.02167	1.10703
100152055_TGI_at	CACNA2D2	2.40112	0.0163452	1.66575	0.628264	1.82967
100160332_TGI_at	C11orf91	2.40065	0.0163659	1.60138	1.61011	0.916394
100126380_TGI_at	C19orf33	2.40051	0.0163723	3.11414	0.347751	0.101737
100305437_TGI_at	MYH7	-2.3998	0.0164039	-1.91502	-0.876219	-1.22762
100301287_TGI_at	ANGPT1	2.39958	0.0164138	1.74569	0.652117	1.69119
100302745_TGI_at	CARTPT	2.39867	0.0164546	1.39362	0.901471	1.92425
100131524_TGI_at	IL6ST	2.39829	0.0164719	1.20823	1.64024	1.42733
100131398_TGI_at	C22:CTA-250D10.9	-2.39819	0.0164761	-2.51181	-0.59821	-0.67868
100134486_TGI_at	-	-2.39795	0.0164873	-1.31662	-2.34409	-0.557845
100160828_TGI_at	-	2.39769	0.016499	2.13835	1.61726	0.156912
100128501_TGI_at	SMARCE1	2.39715	0.016523	0.271393	2.46379	1.88678
100141272_TGI_at	EBP	-2.39584	0.0165825	-1.18882	-0.731437	-2.37671
100155945_TGI_at	MEFV	-2.39569	0.016589	-2.71117	-0.486936	-0.51016
100309164_TGI_at	EIF4G3	-2.39567	0.0165901	-1.98296	-1.56926	-0.417826
100159127_TGI_at	MS4A4A	2.39536	0.0166041	2.27758	1.17626	0.408743
100139784_TGI_at	-	2.39522	0.0166104	1.15017	0.878731	2.27891
merck2-EBV_LMP2_at	-	-2.39451	0.0166426	-0.761807	-2.44121	-1.22297
100131761_TGI_at	-	-2.3944	0.0166476	-2.36045	-0.861904	-0.612407
100150747_TGI_at	-	-2.39435	0.0166498	-1.77907	-1.35592	-0.916242
100153864_TGI_at	-	-2.3942	0.0166568	-1.88665	-1.56291	-0.555223
100131015_TGI_at	LNPEP	2.39405	0.0166637	1.38129	2.55506	0.244942
100137890_TGI_at	SLC27A6	-2.39385	0.0166724	0.400979	-3.17596	-2.088
100131571_TGI_at	-	-2.39375	0.0166772	-1.83445	-0.488289	-1.72336
100306380_TGI_at	NUP153	2.39365	0.0166815	2.43999	0.949183	0.411324
100160007_TGI_at	VGLL2	-2.39356	0.0166856	-0.947879	-1.60641	-1.81426
100307208_TGI_at	CREBL2	2.39355	0.0166861	2.31842	1.70125	-0.187288
100131781_TGI_at	-	-2.39354	0.0166865	-1.00287	-1.03545	-2.32038
100305697_TGI_at	-	-2.39321	0.0167018	-2.6949	0.0311216	-1.05641
100130737_TGI_at	-	2.39294	0.016714	2.56861	0.523784	0.665204
100147204_TGI_at	ZNF573	-2.3928	0.0167205	-1.26848	-2.38383	-0.573942
100142288_TGI_at	GSK3A	-2.39237	0.0167402	-1.77684	-1.03541	-1.24241
100129845_TGI_at	-	2.39152	0.0167789	2.14142	0.518516	1.26145
100128569_TGI_at	LNPEP	-2.39127	0.0167901	-1.84733	-1.17527	-0.999565
100156620_TGI_at	HACE1	2.39115	0.0167959	1.14935	2.1569	0.967751
100147147_TGI_at	NEK5	2.39109	0.0167987	2.05203	0.0347597	1.87842
100309980_TGI_at	KLF7	-2.39083	0.0168104	-2.64219	-0.734793	-0.343431
100156822_TGI_at	LRRC51	2.39064	0.016819	2.28181	0.0833577	1.5086
100313824_TGI_at	UIMC1	2.3898	0.0168574	1.76599	0.769718	1.52348
100125111_TGI_at	HNF1A	-2.38976	0.0168594	-1.95546	-0.462049	-1.574
100155172_TGI_at	GNA14	2.38969	0.0168628	3.23403	-1.39418	1.6909
100162793_TGI_at	MTFR1	-2.38968	0.0168629	-1.54707	-0.41037	-2.19415
100305464_TGI_at	ABHD2	2.38942	0.0168749	1.80473	1.44591	0.77894
100134021_TGI_at	-	2.38925	0.0168828	1.31192	0.888868	2.03187
100312864_TGI_at	ASB9	-2.38901	0.0168939	-0.379436	-0.551113	-3.67197
100135117_TGI_at	-	2.38887	0.0169004	2.70051	0.65871	0.336105
100153571_TGI_at	-	2.38884	0.0169018	2.46523	-0.845848	2.19819
100132765_TGI_at	THOC1	2.38868	0.0169089	1.40569	1.81015	0.960405
100157042_TGI_at	SVEP1	2.38832	0.0169254	2.11919	0.952793	0.842868
100160539_TGI_at	LEPREL1	2.38816	0.0169331	1.3223	0.878823	2.02551
100152123_TGI_at	CD276	-2.3881	0.0169357	-1.77907	-1.07728	-1.1881
100148525_TGI_at	IBSP	-2.38809	0.016936	-1.59093	-1.96458	-0.544201
100123740_TGI_at	-	2.38806	0.0169377	1.10889	1.06022	2.13682
100312463_TGI_at	TMEM49	2.38805	0.0169381	1.14882	1.30818	1.82831
100151556_TGI_at	ZNF518B	-2.388	0.0169405	-1.1554	-1.13605	-1.9947
100159796_TGI_at	-	2.38749	0.0169637	1.51453	-0.0718684	2.72706
100313510_TGI_at	AGER	2.38731	0.0169723	2.78766	0.632804	0.238308
100306234_TGI_at	C10orf118	-2.38718	0.0169782	-2.14282	0.0832737	-1.86489
100162227_TGI_at	-	2.387	0.0169864	1.0544	1.70792	1.54957
100310724_TGI_at	WIF1	2.38645	0.0170118	0.546412	1.74848	2.21309
100129840_TGI_at	ARL4C	2.38625	0.0170211	2.86056	-0.364948	1.15293
100156453_TGI_at	SLC4A1	-2.38601	0.0170321	-1.873	-0.653773	-1.48551
100147776_TGI_at	KIAA0040	2.38587	0.0170385	1.3342	1.49988	1.37073
100301466_TGI_at	MLXIPL	-2.38526	0.0170671	-0.70444	-2.30262	-1.42567
100301090_TGI_at	RC3H1	2.38522	0.017069	1.61599	2.56286	-0.106805
100126726_TGI_at	MKS1	2.38504	0.0170773	2.57018	0.937309	0.225346
100310748_TGI_at	ADCY7	-2.38503	0.0170778	-1.77267	-0.508867	-1.77084
100146456_TGI_at	-	2.38486	0.0170854	1.22181	0.462772	2.58313
100162111_TGI_at	KLHL22	-2.38459	0.017098	-0.24108	-1.682	-2.70156
100305830_TGI_at	NDP	-2.38433	0.0171102	-1.71008	-0.901735	-1.45558
100162022_TGI_at	MAP1LC3C	2.38423	0.0171148	2.04911	0.0920151	1.8104
100302401_TGI_at	MYST4	-2.38322	0.0171619	-2.24099	-0.671669	-0.950256
100143535_TGI_at	LPAR5	-2.38319	0.0171634	-0.951493	-1.69561	-1.69755
100124072_TGI_at	PCDHB19P	2.38303	0.0171707	1.45367	1.26567	1.43801
100131969_TGI_at	ERF	-2.38289	0.0171771	-0.81894	-2.08326	-1.48566
100138897_TGI_at	-	2.3826	0.017191	2.03225	0.558315	1.35478
100150506_TGI_at	-	-2.38201	0.0172186	-1.1149	-0.317812	-2.87392
100139899_TGI_at	-	-2.38193	0.0172222	-2.24542	-0.743225	-0.868521
100128099_TGI_at	TIFA	2.38162	0.0172367	1.60887	1.99721	0.473085
100304686_TGI_at	-	-2.38161	0.0172371	-2.94679	0.656395	-1.32122
100309579_TGI_at	TTC7A	-2.38129	0.0172522	-2.10863	-1.22189	-0.56894
100139474_TGI_at	-	-2.38065	0.017282	-1.342	-1.33604	-1.51666
100154650_TGI_at	ADD2	-2.38063	0.0172831	-2.41908	-0.403355	-0.971359
100304682_TGI_at	EIF4E	2.37982	0.0173209	-0.202082	2.17126	2.80875
100159431_TGI_at	ANKZF1	-2.37932	0.0173444	-1.47291	-0.68197	-1.99946
100147465_TGI_at	GNB4	2.37917	0.0173518	1.00542	1.64965	1.66148
100300285_TGI_at	SPON1	2.37909	0.0173556	0.358837	1.4456	2.76813
100130967_TGI_at	CCDC13	2.37852	0.0173824	1.08624	2.46133	0.719674
100156166_TGI_at	PTGES2	-2.37784	0.0174144	-2.19594	-0.859868	-0.810123
100303841_TGI_at	DPYS	2.37748	0.0174312	1.29049	0.866246	2.06128
merck2-NM_004103-360.B_at	-	-2.37625	0.0174895	-1.67715	-0.607197	-1.78577
100312453_TGI_at	2012-09-02	-2.37568	0.0175166	-1.85538	-2.76798	0.66781
100138776_TGI_at	-	-2.37563	0.0175189	-1.51389	-1.71276	-0.883385
100146724_TGI_at	-	-2.37532	0.0175335	-1.43821	-0.685656	-2.03595
100307372_TGI_at	-	2.37505	0.0175466	1.28518	1.97108	0.936506
100152699_TGI_at	-	2.3747	0.017563	2.19814	1.50506	0.142497
100302655_TGI_at	SLCO1A2	2.37444	0.0175754	1.08733	2.06405	1.11541
100312427_TGI_at	-	-2.37401	0.0175959	-1.27041	-1.04758	-1.89726
100139182_TGI_at	-	2.3739	0.0176013	2.18594	-0.679786	2.38714
100131353_TGI_at	-	-2.37383	0.0176044	-2.26048	-1.6435	0.0871272
100128131_TGI_at	HIST1H2BK	-2.37378	0.0176073	-2.87883	-0.342661	-0.380672
100140048_TGI_at	KIF26A	-2.37371	0.0176106	-1.50635	-1.42357	-1.1851
100126057_TGI_at	CDH24	-2.37329	0.0176305	-0.858086	-1.55998	-1.94602
100148299_TGI_at	GLT8D3	2.37314	0.0176376	1.84335	1.05302	1.0937
100148618_TGI_at	SFRS18	2.37275	0.017656	1.5953	1.09347	1.39639
100301771_TGI_at	C1orf149	2.37272	0.0176578	1.19877	0.827602	2.21868
100156358_TGI_at	-	2.37253	0.0176668	2.43095	1.11288	0.214764
100301956_TGI_at	-	-2.37199	0.0176925	-1.76073	-1.0609	-1.19819
100310273_TGI_at	CAV1	2.37193	0.0176954	2.69783	0.506668	0.461211
100139318_TGI_at	PSG4	2.37126	0.0177276	1.30589	1.24383	1.64221
100154071_TGI_at	BMP2	2.37102	0.017739	0.746038	1.13788	2.52791
100144580_TGI_at	ZNF699	2.37099	0.0177403	2.81512	0.760473	0.0373647
100123778_TGI_at	-	2.37075	0.0177522	1.13588	2.22682	0.87448
100158380_TGI_at	VASN	2.37066	0.0177564	2.09816	-0.784514	2.60954
100155822_TGI_at	TBC1D8	2.37043	0.0177674	2.58719	2.02139	-0.93356
100159501_TGI_at	-	2.37031	0.0177732	2.27729	1.24939	0.284599
100311405_TGI_at	COL1A2	-2.37023	0.0177771	-1.02274	-0.540494	-2.75131
100304057_TGI_at	BMP5	2.36931	0.0178214	2.08042	0.877596	0.935576
100156419_TGI_at	DPRX	-2.3683	0.0178699	-1.20376	-0.850307	-2.17979
100309740_TGI_at	IPO7	2.368	0.0178847	1.73841	-0.309754	2.61979
100136034_TGI_at	CLIC5	2.36787	0.0178911	2.77126	1.40599	-0.566563
100301866_TGI_at	ANKFY1	-2.36754	0.0179066	-2.68752	0.575457	-1.57092
100309349_TGI_at	ZFP161	-2.36736	0.0179155	0.479398	-2.39905	-2.93689
100138556_TGI_at	WDR57	2.36686	0.0179398	2.66134	1.0183	-0.0202334
100131894_TGI_at	UGCGL1	-2.36666	0.0179496	-2.13506	-0.130981	-1.61614
100152027_TGI_at	C6orf140	2.36606	0.0179785	1.68023	0.447925	1.92369
100138575_TGI_at	IDH3G	-2.3659	0.0179863	-0.955037	-0.894296	-2.47578
100132594_TGI_at	CDC42EP4	2.36584	0.0179892	3.38213	-1.37931	1.42238
100311004_TGI_at	C6orf151	2.36575	0.0179937	2.23075	2.57704	-1.01446
100155988_TGI_at	GPD1L	2.3653	0.0180155	1.36152	0.832573	1.97264
100144034_TGI_at	HGF	2.36513	0.0180239	0.722519	1.92516	1.74556
100157734_TGI_at	CADM3	-2.36438	0.0180604	-2.04962	-1.21295	-0.626373
100135401_TGI_at	-	-2.3638	0.0180887	-0.629661	-1.97096	-1.82523
100124628_TGI_at	-	2.3637	0.0180936	2.11503	-0.0245149	1.79675
100160095_TGI_at	SVEP1	2.36347	0.0181045	2.04456	0.802165	1.05074
100144757_TGI_at	RBM33	2.36305	0.0181253	0.739518	0.535331	3.13589
100148742_TGI_at	C10orf118	-2.36255	0.0181496	-0.766545	-2.30989	-1.28668
100147535_TGI_at	NAB1	-2.36229	0.0181623	-1.00164	-1.02345	-2.27205
100303610_TGI_at	IL6R	2.36227	0.0181633	2.10811	0.965788	0.793075
100160942_TGI_at	-	-2.36212	0.0181709	-1.86244	-0.946888	-1.15348
100129541_TGI_at	COL6A2	-2.36179	0.0181868	-1.78614	-1.23436	-0.965565
100158955_TGI_at	RTN4IP1	-2.36117	0.0182174	-1.99124	-0.659186	-1.26615
100160628_TGI_at	PROM2	-2.36113	0.0182193	-1.60348	-0.0332012	-2.44369
100152291_TGI_at	MAZ	-2.36089	0.0182313	-1.47559	-0.0886559	-2.56436
100306948_TGI_at	-	2.36066	0.0182427	1.37897	1.12834	1.63734
100304607_TGI_at	POLR2A	-2.36044	0.0182535	-2.80206	-0.498431	-0.301847
100152206_TGI_at	-	-2.36008	0.0182709	-1.9092	-0.979997	-1.05066
100161604_TGI_at	-	2.35978	0.0182856	1.93562	0.27806	1.72956
100139685_TGI_at	NDFIP2	2.35966	0.0182916	3.02009	0.944556	-0.457913
100122593_TGI_at	MYOT	-2.35914	0.0183174	-0.388575	-2.52995	-1.58064
100306696_TGI_at	-	2.35875	0.0183368	2.4164	-0.831537	2.19148
100133123_TGI_at	IFNB1	2.35854	0.0183468	0.534525	3.17791	0.715476
100140915_TGI_at	REEP3	2.35844	0.018352	0.479316	2.89405	1.08163
100139684_TGI_at	SUPT16H	2.35829	0.0183594	2.21941	1.10867	0.484674
100309388_TGI_at	CUGBP2	2.35816	0.0183656	0.156376	2.5773	1.85309
100143283_TGI_at	-	2.35816	0.0183659	2.35268	-0.520797	1.96181
100122162_TGI_at	SFRS16	-2.35788	0.0183799	-1.14426	-2.10976	-0.956616
100310335_TGI_at	ANGPTL1	-2.35767	0.0183901	-2.23442	-0.31477	-1.27263
100133861_TGI_at	LARP5	2.35719	0.0184136	1.97478	0.675411	1.26455
100162409_TGI_at	-	-2.35707	0.0184199	-2.3917	-0.0392768	-1.33393
100150929_TGI_at	-	2.35704	0.0184213	0.976046	2.18337	1.11363
100121732_TGI_at	-	-2.35702	0.0184224	-1.95782	-1.16369	-0.789551
100308866_TGI_at	ERAP1	2.357	0.0184233	0.642804	2.78458	0.96324
100153948_TGI_at	C20orf194	2.35681	0.0184324	2.40309	-0.0675054	1.42656
100155646_TGI_at	IMPA2	2.35673	0.0184367	2.54533	-0.454548	1.62362
100146878_TGI_at	ADAMTSL3	-2.3566	0.0184432	-1.24856	-1.45961	-1.47249
100156783_TGI_at	-	-2.35656	0.0184453	-1.82361	-1.87522	-0.249157
100303460_TGI_at	TDG	-2.35637	0.0184547	-1.66016	-1.17872	-1.18659
100141324_TGI_at	-	2.35579	0.0184834	2.54459	1.94552	-0.82612
100300981_TGI_at	DYNLRB1	-2.35565	0.0184904	-1.31565	-0.403901	-2.45454
100140097_TGI_at	UMODL1	2.35547	0.0184993	1.27125	2.25674	0.625372
100313192_TGI_at	-	-2.35535	0.0185054	-2.32313	-1.24591	-0.194627
100137855_TGI_at	-	-2.3553	0.0185076	-0.777884	-0.338107	-3.26837
[truncated: 50,380 more rows]
